# Supplementary material for: Perturbation theory model of reactivity and enantioselectivity of palladium-catalyzed Heck–Heck cascade reactions
Source: Royal Society of Chemistry journal article supplement (doi:10.1039/c6ra08751e), 2016-01-01
Supplement: c6ra08751e1.pdf [file c6ra08751e1.pdf]

# Electronic Supplementary Information

## (ESI)

### Perturbation Theory Model of Reactivity and Enantioselectivity of palladium-catalyzed Heck-Heck cascade reactions

C. Blázquez-Barbadillo, E. Aranzamendi, E. Coya, E. Lete, N. Sotomayor and

H. González-Díaz

#### Contents:

|                                                                                                                                                       |     |
|-------------------------------------------------------------------------------------------------------------------------------------------------------|-----|
| 1. Dataset: experimental conditions.....                                                                                                              | S2  |
| 2. Dataset: Input variables and model results.....                                                                                                    | S14 |
| 3. Molecule codes.....                                                                                                                                | S26 |
| 4. Experimental procedure for the synthesis of ( <i>R</i> )-9,10-dimethoxy-11b-methyl-7,11b-dihydro-1H-pyrrolo[3,2,1- <i>de</i> ]phenanthridine ..... | S29 |
| 5. Copies of HPLC chromatograms.....                                                                                                                  | S30 |

## 1. Dataset: experimental conditions

Solvents: 1 = DMF, 2 = Acetonitrile, 3 = Ethanol, 4 = THF, 5 = Dioxane, 6 = Toluene, 7 = Chloroform, 8 = DMA, 9 = NMP, 10 = Nitrobenzene and propanol.a) Coya, E.; Sotomayor, N.; Lete, E. *Adv. Synth. Catal.* **2015**, *357*, 3206. b) Maddafor, S. P.; Andersen, N. G.; Cristofoli, W. A.; Keay, *Am. Chem. Soc.* **1996**, *118*, 10766. c) Lau, S. Y. W.; Keay, B. A. *Synlett* **1999**, *5*, 605. d) Rankic, D. A.; Lucciola, D.; Keay, B. A. *Tetrahedron Lett* **51**, 5724. e) Lucciola, D.; Keay, B. A. *Synlett* **2011**, *11*, 1618.

**Table S1.** Dataset of the enantioselective cascade Heck-Heck reactions .

| n  | p     | $P_{\epsilon_{ij}}(\%)$ | Codes |                      |      | Base                | Sol. | Pr. | Config |     | $\langle \epsilon_i \rangle$ | Pd (%) | L  | B (eq.) | T ( $^{\circ}\text{C}$ ) | t (h) | Ref |
|----|-------|-------------------------|-------|----------------------|------|---------------------|------|-----|--------|-----|------------------------------|--------|----|---------|--------------------------|-------|-----|
|    |       |                         | Sub.  | Cat.                 | L.   |                     |      |     | L.     | Pr. |                              |        |    |         |                          |       |     |
| 1  | ee(%) | 56                      | S01   | Pd(OAc) <sub>2</sub> | L01A | Et <sub>3</sub> N   | 1    | P01 | R      | R   | 46                           | 5      | 14 | 2       | 80                       | 72    | a   |
| 2  | ee(%) | 63                      | S01   | Pd(OAc) <sub>2</sub> | L01A | Et <sub>3</sub> N   | 1    | P01 | R      | R   | 46                           | 10     | 28 | 2       | 80                       | 72    | a   |
| 3  | ee(%) | 0                       | S01   | Pd(OAc) <sub>2</sub> | L01A | PMP                 | 1    | P01 | R      | R   | 46                           | 10     | 28 | 2       | 80                       | 72    | a   |
| 4  | ee(%) | 29                      | S01   | Pd(OAc) <sub>2</sub> | L01A | Et <sub>3</sub> N   | 1    | P01 | R      | R   | 46                           | 10     | 28 | 2       | 110                      | 72    | a   |
| 5  | ee(%) | 30                      | S01   | Pd(OAc) <sub>2</sub> | L01A | Cy <sub>2</sub> NMe | 1    | P01 | R      | R   | 46                           | 10     | 28 | 2       | 80                       | 72    | a   |
| 6  | ee(%) | 0                       | S01   | Pd(OAc) <sub>2</sub> | L01A | Et <sub>3</sub> N   | 1    | P01 | R      | R   | 46                           | 10     | 28 | 2       | 80                       | 72    | a   |
| 7  | ee(%) | 67                      | S01   | Pd(OAc) <sub>2</sub> | L01A | Et <sub>3</sub> N   | 2    | P01 | R      | R   | 46                           | 10     | 28 | 2       | 80                       | 72    | a   |
| 8  | ee(%) | 65                      | S01   | Pd(OAc) <sub>2</sub> | L01A | PMP                 | 2    | P01 | R      | R   | 46                           | 10     | 28 | 2       | 80                       | 24    | a   |
| 9  | ee(%) | 66                      | S01   | Pd(OAc) <sub>2</sub> | L01A | PMP                 | 2    | P01 | R      | R   | 46                           | 10     | 28 | 2       | 80                       | 24    | a   |
| 10 | ee(%) | 66                      | S01   | Pd(dba) <sub>2</sub> | L01A | PMP                 | 2    | P01 | R      | R   | 70                           | 10     | 28 | 2       | 80                       | 24    | a   |
| 11 | ee(%) | 70                      | S01   | Pd(dba) <sub>2</sub> | L01A | PMP                 | 3    | P01 | R      | R   | 70                           | 10     | 28 | 2       | 80                       | 24    | a   |
| 12 | ee(%) | 68                      | S01   | Pd(OAc) <sub>2</sub> | L01A | PMP                 | 3    | P01 | R      | R   | 46                           | 10     | 28 | 2       | 80                       | 48    | a   |
| 13 | ee(%) | 0                       | S01   | Pd(OAc) <sub>2</sub> | L01A | PMP                 | 2    | P01 | R      | R   | 46                           | 10     | 28 | 2       | 40                       | 72    | a   |
| 14 | ee(%) | 63                      | S01   | Pd(OAc) <sub>2</sub> | L01A | Cy <sub>2</sub> NMe | 2    | P01 | R      | R   | 46                           | 10     | 28 | 2       | 80                       | 30    | a   |
| 15 | ee(%) | 63                      | S01   | Pd(OAc) <sub>2</sub> | L01A | PMP                 | 2    | P01 | R      | R   | 46                           | 10     | 28 | 1       | 80                       | 48    | a   |
| 16 | ee(%) | 63                      | S01   | Pd(OAc) <sub>2</sub> | L01A | PMP                 | 2    | P01 | R      | R   | 46                           | 10     | 28 | 3       | 80                       | 48    | a   |
| 17 | ee(%) | 58                      | S01   | Pd(OAc) <sub>2</sub> | L01A | PMP                 | 2    | P01 | R      | R   | 46                           | 10     | 28 | 2       | 80                       | 24    | a   |
| 18 | ee(%) | 0                       | S01   | Pd(OAc) <sub>2</sub> | L01A | Et <sub>3</sub> N   | 4    | P01 | R      | R   | 46                           | 10     | 28 | 2       | 80                       | 72    | a   |
| 19 | ee(%) | 62                      | S01   | Pd(OAc) <sub>2</sub> | L01A | Et <sub>3</sub> N   | 5    | P01 | R      | R   | 46                           | 10     | 28 | 2       | 80                       | 72    | a   |
| 20 | ee(%) | 49                      | S01   | Pd(OAc) <sub>2</sub> | L01A | PMP                 | 2    | P01 | R      | R   | 46                           | 10     | 28 | 2       | 80                       | 31    | a   |
| 21 | ee(%) | 40                      | S01   | Pd(OAc) <sub>2</sub> | L01A | PMP                 | 6    | P01 | R      | R   | 46                           | 10     | 28 | 2       | 80                       | 24    | a   |
| 22 | ee(%) | 57                      | S01   | Pd(OAc) <sub>2</sub> | L01A | PMP                 | 3    | P01 | R      | R   | 46                           | 10     | 28 | 2       | 80                       | 24    | a   |
| 23 | ee(%) | 55                      | S01   | Pd(OAc) <sub>2</sub> | L03A | PMP                 | 2    | P01 | R      | R   | 46                           | 10     | 28 | 2       | 80                       | 31    | a   |
| 24 | ee(%) | 11                      | S01   | Pd(OAc) <sub>2</sub> | L04A | PMP                 | 2    | P01 | R      | R   | 46                           | 10     | 28 | 2       | 80                       | 24    | a   |
| 25 | ee(%) | 34                      | S01   | Pd(OAc) <sub>2</sub> | L05A | PMP                 | 2    | P01 | RR     | R   | 43                           | 10     | 28 | 2       | 80                       | 31    | a   |
| 26 | ee(%) | 41                      | S01   | Pd(OAc) <sub>2</sub> | L06A | PMP                 | 1    | P01 | RR     | R   | 43                           | 10     | 28 | 2       | 80                       | 48    | a   |
| 27 | ee(%) | 53                      | S01   | Pd(OAc) <sub>2</sub> | L06A | Et <sub>3</sub> N   | 1    | P01 | RR     | R   | 43                           | 10     | 28 | 2       | 40                       | 72    | a   |
| 28 | ee(%) | 28                      | S01   | Pd(OAc) <sub>2</sub> | L06A | Et <sub>3</sub> N   | 2    | P01 | RR     | R   | 43                           | 10     | 28 | 2       | 80                       | 24    | a   |
| 29 | ee(%) | 57                      | S01   | Pd(OAc) <sub>2</sub> | L06A | Et <sub>3</sub> N   | 4    | P01 | RR     | R   | 43                           | 10     | 28 | 2       | 80                       | 72    | a   |
| 30 | ee(%) | 55                      | S01   | Pd(OAc) <sub>2</sub> | L06A | Et <sub>3</sub> N   | 4    | P01 | RR     | R   | 43                           | 10     | 28 | 2       | 80                       | 72    | a   |
| 31 | ee(%) | 46                      | S01   | Pd(OAc) <sub>2</sub> | L06A | PMP                 | 4    | P01 | RR     | R   | 43                           | 10     | 28 | 2       | 40                       | 72    | a   |
| 32 | ee(%) | 56                      | S01   | Pd(OAc) <sub>2</sub> | L06A | Et <sub>3</sub> N   | 5    | P01 | RR     | R   | 43                           | 10     | 28 | 2       | 80                       | 72    | a   |
| 33 | ee(%) | 54                      | S01   | Pd(OAc) <sub>2</sub> | L06A | Et <sub>3</sub> N   | 5    | P01 | RR     | R   | 43                           | 10     | 20 | 3       | 80                       | 72    | a   |
| 34 | ee(%) | 30                      | S01   | Pd(OAc) <sub>2</sub> | L06A | Cy <sub>2</sub> NMe | 1    | P01 | RR     | R   | 43                           | 10     | 20 | 3       | 80                       | 48    | a   |
| 35 | ee(%) | 37                      | S01   | Pd(OAc) <sub>2</sub> | L06A | Cy <sub>2</sub> NMe | 1    | P01 | RR     | R   | 43                           | 10     | 20 | 2       | 80                       | 9     | a   |

|    |       |     |     |                                    |      |                                |   |     |    |   |     |     |    |   |     |    |   |
|----|-------|-----|-----|------------------------------------|------|--------------------------------|---|-----|----|---|-----|-----|----|---|-----|----|---|
| 36 | ee(%) | 53  | S01 | Pd(OAc) <sub>2</sub>               | L06A | Cy <sub>2</sub> NMe            | 2 | P01 | RR | R | 43  | 10  | 20 | 2 | 80  | 24 | a |
| 37 | ee(%) | 10  | S01 | Pd(OAc) <sub>2</sub>               | L07A | Et <sub>3</sub> N              | 1 | P01 | RR | R | 43  | 10  | 28 | 2 | 80  | 72 | a |
| 38 | ee(%) | 50  | S01 | Pd(OAc) <sub>2</sub>               | L01A | Et <sub>3</sub> N              | 1 | P01 | R  | R | 70  | 5   | 14 | 2 | 80  | 72 | a |
| 39 | ee(%) | 71  | S12 | Pd(OAc) <sub>2</sub>               | L01A | PMP                            | 2 | P12 | R  | R | 46  | 10  | 28 | 2 | 80  | 48 | a |
| 40 | ee(%) | -69 | S12 | Pd(OAc) <sub>2</sub>               | L01B | PMP                            | 2 | P12 | S  | S | -69 | 10  | 28 | 2 | 80  | 48 | a |
| 41 | ee(%) | 61  | S12 | Pd(OAc) <sub>2</sub>               | L01A | PMP                            | 2 | P12 | R  | R | 46  | 10  | 14 | 2 | 80  | 48 | a |
| 42 | ee(%) | 63  | S02 | Pd(OAc) <sub>2</sub>               | L01A | PMP                            | 2 | P02 | R  | R | 46  | 10  | 28 | 2 | 80  | 48 | a |
| 43 | ee(%) | 72  | S03 | Pd(OAc) <sub>2</sub>               | L01A | PMP                            | 2 | P03 | R  | R | 46  | 10  | 28 | 2 | 80  | 48 | a |
| 44 | ee(%) | 67  | S04 | Pd(OAc) <sub>2</sub>               | L01A | PMP                            | 2 | P04 | R  | R | 46  | 10  | 28 | 2 | 80  | 48 | a |
| 45 | ee(%) | 69  | S05 | Pd(OAc) <sub>2</sub>               | L01A | PMP                            | 2 | P05 | R  | R | 46  | 10  | 28 | 2 | 80  | 48 | a |
| 46 | ee(%) | 7   | S06 | Pd(OAc) <sub>2</sub>               | L01A | PMP                            | 2 | P06 | R  | R | 46  | 10  | 28 | 2 | 80  | 48 | a |
| 47 | ee(%) | 63  | S07 | Pd(OAc) <sub>2</sub>               | L01A | PMP                            | 2 | P07 | R  | R | 46  | 10  | 28 | 2 | 80  | 48 | a |
| 48 | ee(%) | 30  | S08 | Pd(OAc) <sub>2</sub>               | L01A | PMP                            | 2 | P08 | R  | R | 46  | 10  | 28 | 2 | 80  | 48 | a |
| 49 | ee(%) | 71  | S09 | Pd(OAc) <sub>2</sub>               | L01A | PMP                            | 2 | P09 | R  | R | 46  | 10  | 28 | 2 | 80  | 48 | a |
| 50 | ee(%) | 66  | S10 | Pd(OAc) <sub>2</sub>               | L01A | PMP                            | 2 | P10 | R  | R | 46  | 10  | 28 | 2 | 80  | 48 | a |
| 51 | ee(%) | 61  | S11 | Pd(OAc) <sub>2</sub>               | L01A | PMP                            | 2 | P11 | R  | R | 46  | 10  | 28 | 2 | 80  | 48 | a |
| 52 | ee(%) | 61  | S12 | Pd(OAc) <sub>2</sub>               | L01A | PMP                            | 2 | P12 | R  | R | 46  | 10  | 28 | 2 | 80  | 48 | a |
| 53 | ee(%) | 28  | S13 | Pd(OAc) <sub>2</sub>               | L01A | PMP                            | 2 | P13 | R  | R | 46  | 10  | 28 | 2 | 80  | 48 | a |
| 54 | ee(%) | 64  | S14 | Pd(OAc) <sub>2</sub>               | L01A | PMP                            | 2 | P14 | R  | R | 46  | 10  | 28 | 2 | 80  | 48 | a |
| 55 | ee(%) | 0   | S15 | Pd(OAc) <sub>2</sub>               | L01A | PMP                            | 2 | P15 | R  | R | 46  | 10  | 28 | 2 | 80  | 48 | a |
| 56 | ee(%) | 99  | S16 | Pd(OAc) <sub>2</sub>               | L01A | PMP                            | 2 | P16 | R  | R | 46  | 10  | 28 | 2 | 80  | 48 | a |
| 57 | ee(%) | 64  | S17 | Pd(OAc) <sub>2</sub>               | L01A | PMP                            | 2 | P17 | R  | R | 46  | 10  | 28 | 2 | 80  | 48 | a |
| 58 | ee(%) | 0   | S18 | Pd(OAc) <sub>2</sub>               | L01A | PMP                            | 2 | P18 | R  | R | 46  | 10  | 28 | 2 | 80  | 48 | a |
| 59 | ee(%) | 0   | S19 | Pd(OAc) <sub>2</sub>               | L01A | PMP                            | 2 | P19 | R  | R | 46  | 10  | 28 | 2 | 80  | 48 | a |
| 60 | ee(%) | 0   | S20 | Pd(OAc) <sub>2</sub>               | L01A | PMP                            | 2 | P20 | R  | R | 46  | 10  | 28 | 2 | 80  | 48 | a |
| 61 | ee(%) | -68 | S21 | Pd <sub>2</sub> (dba) <sub>3</sub> | L01B | PMP                            | 6 | P22 | S  | S | -68 | 2,5 | 10 | 8 | 110 | 12 | b |
| 62 | ee(%) | 90  | S23 | Pd <sub>2</sub> (dba) <sub>3</sub> | L01A | PMP                            | 6 | P24 | R  | R | 70  | 5   | 10 | 5 | 110 | 48 | c |
| 63 | ee(%) | 71  | S24 | Pd <sub>2</sub> (dba) <sub>3</sub> | L01A | PMP                            | 6 | P25 | R  | R | 70  | 5   | 10 | 5 | 110 | 48 | c |
| 65 | ee(%) | 96  | S26 | Pd <sub>2</sub> (dba) <sub>3</sub> | L01A | PMP                            | 6 | P27 | R  | R | 70  | 5   | 10 | 5 | 110 | 72 | c |
| 66 | ee(%) | 71  | S27 | Pd <sub>2</sub> (dba) <sub>3</sub> | L01A | PMP                            | 6 | P28 | R  | R | 70  | 5   | 10 | 5 | 110 | 72 | c |
| 67 | ee(%) | 16  | S24 | Pd <sub>2</sub> (dba) <sub>3</sub> | L01A | PMP                            | 6 | P25 | R  | R | 70  | 5   | 10 | 5 | 110 | 48 | c |
| 68 | ee(%) | 60  | S24 | Pd <sub>2</sub> (dba) <sub>3</sub> | L01A | PMP                            | 6 | P25 | R  | R | 70  | 5   | 10 | 5 | 60  | 48 | c |
| 69 | ee(%) | 7   | S24 | Pd <sub>2</sub> (dba) <sub>3</sub> | L01A | PMP                            | 6 | P25 | R  | R | 70  | 5   | 10 | 5 | 60  | 48 | c |
| 70 | ee(%) | 69  | S24 | Pd <sub>2</sub> (dba) <sub>3</sub> | L01A | K <sub>2</sub> CO <sub>3</sub> | 6 | P25 | R  | R | 70  | 5   | 10 | 5 | 110 | 72 | c |
| 71 | ee(%) | -24 | S23 | Pd <sub>2</sub> (dba) <sub>3</sub> | L05A | PMP                            | 6 | P30 | RR | S | -51 | 5   | 10 | 5 | 110 | 72 | c |
| 72 | ee(%) | -77 | S25 | Pd <sub>2</sub> (dba) <sub>3</sub> | L05A | PMP                            | 6 | P31 | RR | S | -51 | 5   | 10 | 5 | 110 | 96 | c |
| 73 | ee(%) | 0   | S25 | Pd <sub>2</sub> (dba) <sub>3</sub> | L01A | K <sub>2</sub> CO <sub>3</sub> | 6 | P26 | R  | R | 70  | 5   | 10 | 5 | 110 | 96 | c |
| 74 | ee(%) | -72 | S24 | Pd <sub>2</sub> (dba) <sub>3</sub> | L01B | PMP                            | 6 | P29 | S  | S | -68 | 5   | 20 | 5 | 110 | 48 | d |
| 75 | ee(%) | 0   | S24 | Pd <sub>2</sub> (dba) <sub>3</sub> | L08B | PMP                            | 6 | P25 | S  | R | 42  | 5   | 20 | 5 | 110 | 48 | d |
| 76 | ee(%) | 74  | S24 | Pd <sub>2</sub> (dba) <sub>3</sub> | L09B | PMP                            | 6 | P25 | S  | R | 42  | 5   | 20 | 5 | 110 | 48 | d |
| 77 | ee(%) | 46  | S24 | Pd <sub>2</sub> (dba) <sub>3</sub> | L10B | PMP                            | 6 | P25 | S  | R | 42  | 5   | 20 | 5 | 110 | 48 | d |
| 78 | ee(%) | 14  | S24 | Pd <sub>2</sub> (dba) <sub>3</sub> | L11B | PMP                            | 6 | P25 | S  | R | 42  | 5   | 20 | 5 | 110 | 48 | d |
| 79 | ee(%) | 28  | S24 | Pd <sub>2</sub> (dba) <sub>3</sub> | L03A | PMP                            | 6 | P25 | R  | R | 70  | 5   | 20 | 5 | 110 | 48 | d |
| 80 | ee(%) | -29 | S24 | Pd <sub>2</sub> (dba) <sub>3</sub> | L12A | PMP                            | 6 | P29 | R  | S | -35 | 5   | 20 | 5 | 110 | 48 | d |
| 81 | ee(%) | 47  | S24 | Pd <sub>2</sub> (dba) <sub>3</sub> | L12B | PMP                            | 6 | P25 | S  | R | 42  | 5   | 20 | 5 | 110 | 48 | d |
| 82 | ee(%) | -40 | S24 | Pd <sub>2</sub> (dba) <sub>3</sub> | L13A | PMP                            | 6 | P29 | R  | S | -35 | 5   | 20 | 5 | 110 | 48 | d |

|     |       |     |     |                                    |      |     |    |     |   |   |     |   |    |   |     |     |   |
|-----|-------|-----|-----|------------------------------------|------|-----|----|-----|---|---|-----|---|----|---|-----|-----|---|
| 83  | ee(%) | 28  | S24 | Pd <sub>2</sub> (dba) <sub>3</sub> | L03A | PMP | 6  | P25 | R | R | 70  | 5 | 20 | 5 | 110 | 44  | e |
| 84  | ee(%) | -65 | S24 | Pd <sub>2</sub> (dba) <sub>3</sub> | L14B | PMP | 6  | P29 | S | S | -68 | 5 | 20 | 5 | 110 | 44  | e |
| 85  | ee(%) | 85  | S24 | Pd <sub>2</sub> (dba) <sub>3</sub> | L02A | PMP | 6  | P25 | R | R | 70  | 5 | 20 | 5 | 110 | 44  | e |
| 86  | ee(%) | 70  | S24 | Pd <sub>2</sub> (dba) <sub>3</sub> | L01A | PMP | 6  | P25 | R | R | 70  | 5 | 20 | 5 | 110 | 44  | e |
| 87  | ee(%) | 71  | S24 | Pd <sub>2</sub> (dba) <sub>3</sub> | L15A | PMP | 6  | P25 | R | R | 70  | 5 | 20 | 5 | 110 | 44  | e |
| 88  | ee(%) | 81  | S24 | Pd <sub>2</sub> (dba) <sub>3</sub> | L19A | PMP | 6  | P25 | R | R | 70  | 5 | 20 | 5 | 110 | 44  | e |
| 89  | ee(%) | 94  | S24 | Pd <sub>2</sub> (dba) <sub>3</sub> | L16A | PMP | 6  | P25 | R | R | 70  | 5 | 20 | 5 | 110 | 44  | e |
| 90  | ee(%) | 74  | S24 | Pd <sub>2</sub> (dba) <sub>3</sub> | L17A | PMP | 6  | P25 | R | R | 70  | 5 | 20 | 5 | 110 | 44  | e |
| 91  | ee(%) | 82  | S24 | Pd <sub>2</sub> (dba) <sub>3</sub> | L18A | PMP | 6  | P25 | R | R | 70  | 5 | 20 | 5 | 110 | 44  | e |
| 92  | ee(%) | 62  | S24 | Pd <sub>2</sub> (dba) <sub>3</sub> | L03A | PMP | 3  | P25 | R | R | 70  | 5 | 20 | 5 | 110 | 1,5 | e |
| 93  | ee(%) | 68  | S24 | Pd <sub>2</sub> (dba) <sub>3</sub> | L14B | PMP | 3  | P25 | S | R | 42  | 5 | 20 | 5 | 110 | 1,5 | e |
| 94  | ee(%) | 90  | S24 | Pd <sub>2</sub> (dba) <sub>3</sub> | L02A | PMP | 3  | P25 | R | R | 70  | 5 | 20 | 5 | 110 | 1,5 | e |
| 95  | ee(%) | 71  | S24 | Pd <sub>2</sub> (dba) <sub>3</sub> | L01A | PMP | 3  | P25 | R | R | 70  | 5 | 20 | 5 | 110 | 1,5 | e |
| 96  | ee(%) | 81  | S24 | Pd <sub>2</sub> (dba) <sub>3</sub> | L15A | PMP | 3  | P25 | R | R | 70  | 5 | 20 | 5 | 110 | 1,5 | e |
| 97  | ee(%) | 86  | S24 | Pd <sub>2</sub> (dba) <sub>3</sub> | L19A | PMP | 3  | P25 | R | R | 70  | 5 | 20 | 5 | 110 | 1,5 | e |
| 98  | ee(%) | 97  | S24 | Pd <sub>2</sub> (dba) <sub>3</sub> | L16A | PMP | 3  | P25 | R | R | 70  | 5 | 20 | 5 | 110 | 1,5 | e |
| 99  | ee(%) | 93  | S24 | Pd <sub>2</sub> (dba) <sub>3</sub> | L17A | PMP | 3  | P25 | R | R | 70  | 5 | 20 | 5 | 110 | 1,5 | e |
| 100 | ee(%) | 84  | S24 | Pd <sub>2</sub> (dba) <sub>3</sub> | L18A | PMP | 3  | P25 | R | R | 70  | 5 | 20 | 5 | 110 | 1,5 | e |
| 101 | ee(%) | 0   | S24 | Pd <sub>2</sub> (dba) <sub>3</sub> | L01A | PMP | 9  | P25 | R | R | 70  | 5 | 20 | 5 | 110 | 1,5 | e |
| 102 | ee(%) | 72  | S24 | Pd <sub>2</sub> (dba) <sub>3</sub> | L01A | PMP | 10 | P25 | R | R | 70  | 5 | 20 | 5 | 110 | 1,5 | e |
| 103 | ee(%) | 61  | S24 | Pd <sub>2</sub> (dba) <sub>3</sub> | L01A | PMP | 1  | P25 | R | R | 70  | 5 | 20 | 5 | 110 | 1,5 | e |
| 104 | ee(%) | 70  | S24 | Pd <sub>2</sub> (dba) <sub>3</sub> | L01A | PMP | 6  | P25 | R | R | 70  | 5 | 20 | 5 | 110 | 1,5 | e |
| 105 | ee(%) | 71  | S24 | Pd <sub>2</sub> (dba) <sub>3</sub> | L01A | PMP | 3  | P25 | R | R | 70  | 5 | 20 | 5 | 110 | 1,5 | e |
| 106 | ee(%) | 68  | S24 | Pd <sub>2</sub> (dba) <sub>3</sub> | L01A | PMP | 11 | P25 | R | R | 70  | 5 | 20 | 5 | 110 | 1,5 | e |
| 107 | ee(%) | 27  | S24 | Pd <sub>2</sub> (dba) <sub>3</sub> | L03A | PMP | 6  | P25 | R | R | 70  | 5 | 20 | 5 | 110 | 44  | e |
| 108 | ee(%) | 85  | S24 | Pd <sub>2</sub> (dba) <sub>3</sub> | L02A | PMP | 6  | P25 | R | R | 70  | 5 | 20 | 5 | 110 | 44  | e |
| 109 | ee(%) | 70  | S24 | Pd <sub>2</sub> (dba) <sub>3</sub> | L01A | PMP | 6  | P25 | R | R | 70  | 5 | 20 | 5 | 110 | 44  | e |
| 110 | ee(%) | 71  | S24 | Pd <sub>2</sub> (dba) <sub>3</sub> | L15A | PMP | 6  | P25 | R | R | 70  | 5 | 20 | 5 | 110 | 44  | e |
| 111 | ee(%) | 94  | S24 | Pd <sub>2</sub> (dba) <sub>3</sub> | L16A | PMP | 6  | P25 | R | R | 70  | 5 | 20 | 5 | 110 | 44  | e |
| 112 | ee(%) | 74  | S24 | Pd <sub>2</sub> (dba) <sub>3</sub> | L17A | PMP | 6  | P25 | R | R | 70  | 5 | 20 | 5 | 110 | 44  | e |
| 113 | ee(%) | 23  | S24 | Pd <sub>2</sub> (dba) <sub>3</sub> | L03A | PMP | 6  | P25 | R | R | 70  | 5 | 20 | 5 | 110 | 44  | e |
| 114 | ee(%) | 78  | S24 | Pd <sub>2</sub> (dba) <sub>3</sub> | L02A | PMP | 6  | P25 | R | R | 70  | 5 | 20 | 5 | 110 | 44  | e |
| 115 | ee(%) | 70  | S24 | Pd <sub>2</sub> (dba) <sub>3</sub> | L01A | PMP | 6  | P25 | R | R | 70  | 5 | 20 | 5 | 110 | 44  | e |
| 116 | ee(%) | 65  | S24 | Pd <sub>2</sub> (dba) <sub>3</sub> | L15A | PMP | 6  | P25 | R | R | 70  | 5 | 20 | 5 | 110 | 44  | e |
| 117 | ee(%) | 94  | S24 | Pd <sub>2</sub> (dba) <sub>3</sub> | L16A | PMP | 6  | P25 | R | R | 70  | 5 | 20 | 5 | 110 | 44  | e |
| 118 | ee(%) | 83  | S24 | Pd <sub>2</sub> (dba) <sub>3</sub> | L17A | PMP | 6  | P25 | R | R | 70  | 5 | 20 | 5 | 110 | 44  | e |
| 119 | ee(%) | 63  | S24 | Pd <sub>2</sub> (dba) <sub>3</sub> | L03A | PMP | 3  | P25 | R | R | 70  | 5 | 20 | 5 | 110 | 1,5 | e |
| 120 | ee(%) | 92  | S24 | Pd <sub>2</sub> (dba) <sub>3</sub> | L02A | PMP | 3  | P25 | R | R | 70  | 5 | 20 | 5 | 110 | 1,5 | e |
| 121 | ee(%) | 74  | S24 | Pd <sub>2</sub> (dba) <sub>3</sub> | L01A | PMP | 3  | P25 | R | R | 70  | 5 | 20 | 5 | 110 | 1,5 | e |
| 122 | ee(%) | 85  | S24 | Pd <sub>2</sub> (dba) <sub>3</sub> | L15A | PMP | 3  | P25 | R | R | 70  | 5 | 20 | 5 | 110 | 1,5 | e |
| 123 | ee(%) | 99  | S24 | Pd <sub>2</sub> (dba) <sub>3</sub> | L16A | PMP | 3  | P25 | R | R | 70  | 5 | 20 | 5 | 110 | 1,5 | e |
| 124 | ee(%) | 95  | S24 | Pd <sub>2</sub> (dba) <sub>3</sub> | L17A | PMP | 3  | P25 | R | R | 70  | 5 | 20 | 5 | 110 | 1,5 | e |
| 125 | ee(%) | 62  | S24 | Pd <sub>2</sub> (dba) <sub>3</sub> | L03A | PMP | 3  | P25 | R | R | 70  | 5 | 20 | 5 | 110 | 1,5 | e |
| 126 | ee(%) | 90  | S24 | Pd <sub>2</sub> (dba) <sub>3</sub> | L02A | PMP | 3  | P25 | R | R | 70  | 5 | 20 | 5 | 110 | 1,5 | e |
| 127 | ee(%) | 71  | S24 | Pd <sub>2</sub> (dba) <sub>3</sub> | L01A | PMP | 3  | P25 | R | R | 70  | 5 | 20 | 5 | 110 | 1,5 | e |
| 128 | ee(%) | 81  | S24 | Pd <sub>2</sub> (dba) <sub>3</sub> | L15A | PMP | 3  | P25 | R | R | 70  | 5 | 20 | 5 | 110 | 1,5 | e |
| 129 | ee(%) | 97  | S24 | Pd <sub>2</sub> (dba) <sub>3</sub> | L16A | PMP | 3  | P25 | R | R | 70  | 5 | 20 | 5 | 110 | 1,5 | e |

|     |       |     |     |                                    |      |                     |    |     |   |   |     |    |    |   |     |     |   |
|-----|-------|-----|-----|------------------------------------|------|---------------------|----|-----|---|---|-----|----|----|---|-----|-----|---|
| 130 | ee(%) | 93  | S24 | Pd <sub>2</sub> (dba) <sub>3</sub> | L17A | PMP                 | 3  | P25 | R | R | 70  | 5  | 20 | 5 | 110 | 1,5 | e |
| 131 | ee(%) | -28 | S24 | Pd <sub>2</sub> (dba) <sub>3</sub> | L03B | PMP                 | 6  | P29 | S | S | -69 | 5  | 20 | 5 | 110 | 44  | e |
| 132 | ee(%) | 65  | S24 | Pd <sub>2</sub> (dba) <sub>3</sub> | L14A | PMP                 | 6  | P25 | R | R | 68  | 5  | 20 | 5 | 110 | 44  | e |
| 133 | ee(%) | -85 | S24 | Pd <sub>2</sub> (dba) <sub>3</sub> | L02B | PMP                 | 6  | P29 | S | S | -69 | 5  | 20 | 5 | 110 | 44  | e |
| 134 | ee(%) | -70 | S24 | Pd <sub>2</sub> (dba) <sub>3</sub> | L01B | PMP                 | 6  | P29 | S | S | -69 | 5  | 20 | 5 | 110 | 44  | e |
| 135 | ee(%) | -71 | S24 | Pd <sub>2</sub> (dba) <sub>3</sub> | L15B | PMP                 | 6  | P29 | S | S | -69 | 5  | 20 | 5 | 110 | 44  | e |
| 136 | ee(%) | -81 | S24 | Pd <sub>2</sub> (dba) <sub>3</sub> | L19B | PMP                 | 6  | P29 | S | S | -69 | 5  | 20 | 5 | 110 | 44  | e |
| 137 | ee(%) | -94 | S24 | Pd <sub>2</sub> (dba) <sub>3</sub> | L16B | PMP                 | 6  | P29 | S | S | -69 | 5  | 20 | 5 | 110 | 44  | e |
| 138 | ee(%) | -74 | S24 | Pd <sub>2</sub> (dba) <sub>3</sub> | L17B | PMP                 | 6  | P29 | S | S | -69 | 5  | 20 | 5 | 110 | 44  | e |
| 139 | ee(%) | -82 | S24 | Pd <sub>2</sub> (dba) <sub>3</sub> | L18B | PMP                 | 6  | P29 | S | S | -69 | 5  | 20 | 5 | 110 | 44  | e |
| 140 | ee(%) | -30 | S01 | Pd <sub>2</sub> (dba) <sub>3</sub> | L01B | Cy <sub>2</sub> NMe | 1  | P01 | S | S | -48 | 10 | 28 | 2 | 80  | 72  | a |
| 141 | ee(%) | -62 | S24 | Pd <sub>2</sub> (dba) <sub>3</sub> | L03B | PMP                 | 3  | P29 | S | S | -69 | 5  | 20 | 5 | 110 | 1,5 | e |
| 142 | ee(%) | -68 | S24 | Pd <sub>2</sub> (dba) <sub>3</sub> | L14A | PMP                 | 3  | P29 | R | S | -49 | 5  | 20 | 5 | 110 | 1,5 | e |
| 143 | ee(%) | -90 | S24 | Pd <sub>2</sub> (dba) <sub>3</sub> | L02B | PMP                 | 3  | P29 | S | S | -69 | 5  | 20 | 5 | 110 | 1,5 | e |
| 144 | ee(%) | -71 | S24 | Pd <sub>2</sub> (dba) <sub>3</sub> | L01B | PMP                 | 3  | P29 | S | S | -69 | 5  | 20 | 5 | 110 | 1,5 | e |
| 145 | ee(%) | -81 | S24 | Pd <sub>2</sub> (dba) <sub>3</sub> | L15B | PMP                 | 3  | P29 | S | S | -69 | 5  | 20 | 5 | 110 | 1,5 | e |
| 146 | ee(%) | -86 | S24 | Pd <sub>2</sub> (dba) <sub>3</sub> | L19B | PMP                 | 3  | P29 | S | S | -69 | 5  | 20 | 5 | 110 | 1,5 | e |
| 147 | ee(%) | -97 | S24 | Pd <sub>2</sub> (dba) <sub>3</sub> | L16B | PMP                 | 3  | P29 | S | S | -69 | 5  | 20 | 5 | 110 | 1,5 | e |
| 148 | ee(%) | -93 | S24 | Pd <sub>2</sub> (dba) <sub>3</sub> | L17B | PMP                 | 3  | P29 | S | S | -69 | 5  | 20 | 5 | 110 | 1,5 | e |
| 149 | ee(%) | -84 | S24 | Pd <sub>2</sub> (dba) <sub>3</sub> | L18B | PMP                 | 3  | P29 | S | S | -69 | 5  | 20 | 5 | 110 | 1,5 | e |
| 150 | ee(%) | 0   | S01 | Pd(dba) <sub>2</sub>               | L01B | Et3N                | 1  | P01 | S | S | -48 | 10 | 28 | 2 | 80  | 72  | a |
| 151 | ee(%) | 0   | S24 | Pd <sub>2</sub> (dba) <sub>3</sub> | L01B | PMP                 | 9  | P29 | S | S | -69 | 5  | 20 | 5 | 110 | 1,5 | e |
| 152 | ee(%) | -72 | S24 | Pd <sub>2</sub> (dba) <sub>3</sub> | L01B | PMP                 | 10 | P29 | S | S | -69 | 5  | 20 | 5 | 110 | 1,5 | e |
| 153 | ee(%) | -61 | S24 | Pd <sub>2</sub> (dba) <sub>3</sub> | L01B | PMP                 | 1  | P29 | S | S | -69 | 5  | 20 | 5 | 110 | 1,5 | e |
| 154 | ee(%) | -70 | S24 | Pd <sub>2</sub> (dba) <sub>3</sub> | L01B | PMP                 | 6  | P29 | S | S | -69 | 5  | 20 | 5 | 110 | 1,5 | e |
| 155 | ee(%) | -71 | S24 | Pd <sub>2</sub> (dba) <sub>3</sub> | L01B | PMP                 | 3  | P29 | S | S | -69 | 5  | 20 | 5 | 110 | 1,5 | e |
| 156 | ee(%) | -68 | S24 | Pd <sub>2</sub> (dba) <sub>3</sub> | L01B | PMP                 | 11 | P29 | S | S | -69 | 5  | 20 | 5 | 110 | 1,5 | e |
| 157 | ee(%) | -27 | S24 | Pd <sub>2</sub> (dba) <sub>3</sub> | L03B | PMP                 | 6  | P29 | S | S | -69 | 5  | 20 | 5 | 110 | 44  | e |
| 158 | ee(%) | -85 | S24 | Pd <sub>2</sub> (dba) <sub>3</sub> | L02B | PMP                 | 6  | P29 | S | S | -69 | 5  | 20 | 5 | 110 | 44  | e |
| 159 | ee(%) | -70 | S24 | Pd <sub>2</sub> (dba) <sub>3</sub> | L01B | PMP                 | 6  | P29 | S | S | -69 | 5  | 20 | 5 | 110 | 44  | e |
| 160 | ee(%) | -71 | S24 | Pd <sub>2</sub> (dba) <sub>3</sub> | L15B | PMP                 | 6  | P29 | S | S | -69 | 5  | 20 | 5 | 110 | 44  | e |
| 161 | ee(%) | -67 | S01 | Pd(OAc) <sub>2</sub>               | L01B | Et3N                | 2  | P01 | S | S | -48 | 10 | 28 | 2 | 80  | 72  | a |
| 162 | ee(%) | -94 | S24 | Pd <sub>2</sub> (dba) <sub>3</sub> | L16B | PMP                 | 6  | P29 | S | S | -69 | 5  | 20 | 5 | 110 | 44  | e |
| 163 | ee(%) | -74 | S24 | Pd <sub>2</sub> (dba) <sub>3</sub> | L17B | PMP                 | 6  | P29 | S | S | -69 | 5  | 20 | 5 | 110 | 44  | e |
| 164 | ee(%) | -23 | S24 | Pd <sub>2</sub> (dba) <sub>3</sub> | L03B | PMP                 | 6  | P29 | S | S | -69 | 5  | 20 | 5 | 110 | 44  | e |
| 165 | ee(%) | -78 | S24 | Pd <sub>2</sub> (dba) <sub>3</sub> | L02B | PMP                 | 6  | P29 | S | S | -69 | 5  | 20 | 5 | 110 | 44  | e |
| 166 | ee(%) | -70 | S24 | Pd <sub>2</sub> (dba) <sub>3</sub> | L01B | PMP                 | 6  | P29 | S | S | -69 | 5  | 20 | 5 | 110 | 44  | e |
| 167 | ee(%) | -65 | S24 | Pd <sub>2</sub> (dba) <sub>3</sub> | L15B | PMP                 | 6  | P29 | S | S | -69 | 5  | 20 | 5 | 110 | 44  | e |
| 168 | ee(%) | -94 | S24 | Pd <sub>2</sub> (dba) <sub>3</sub> | L16B | PMP                 | 6  | P29 | S | S | -69 | 5  | 20 | 5 | 110 | 44  | e |
| 169 | ee(%) | -83 | S24 | Pd <sub>2</sub> (dba) <sub>3</sub> | L17B | PMP                 | 6  | P29 | S | S | -69 | 5  | 20 | 5 | 110 | 44  | e |
| 170 | ee(%) | -63 | S24 | Pd <sub>2</sub> (dba) <sub>3</sub> | L03B | PMP                 | 3  | P29 | S | S | -69 | 5  | 20 | 5 | 110 | 1,5 | e |
| 171 | ee(%) | -92 | S24 | Pd <sub>2</sub> (dba) <sub>3</sub> | L02B | PMP                 | 3  | P29 | S | S | -69 | 5  | 20 | 5 | 110 | 1,5 | e |
| 172 | ee(%) | -65 | S01 | Pd(OAc) <sub>2</sub>               | L01B | PMP                 | 2  | P01 | S | S | -48 | 10 | 28 | 2 | 80  | 24  | a |
| 173 | ee(%) | -74 | S24 | Pd <sub>2</sub> (dba) <sub>3</sub> | L01B | PMP                 | 3  | P29 | S | S | -69 | 5  | 20 | 5 | 110 | 1,5 | e |
| 174 | ee(%) | -85 | S24 | Pd <sub>2</sub> (dba) <sub>3</sub> | L15B | PMP                 | 3  | P29 | S | S | -69 | 5  | 20 | 5 | 110 | 1,5 | e |
| 175 | ee(%) | -99 | S24 | Pd <sub>2</sub> (dba) <sub>3</sub> | L16B | PMP                 | 3  | P29 | S | S | -69 | 5  | 20 | 5 | 110 | 1,5 | e |
| 176 | ee(%) | -95 | S24 | Pd <sub>2</sub> (dba) <sub>3</sub> | L17B | PMP                 | 3  | P29 | R | S | -49 | 5  | 20 | 5 | 110 | 1,5 | e |

|     |       |     |     |                                    |      |                     |   |      |    |   |     |    |    |   |     |     |   |
|-----|-------|-----|-----|------------------------------------|------|---------------------|---|------|----|---|-----|----|----|---|-----|-----|---|
| 177 | ee(%) | -62 | S24 | Pd <sub>2</sub> (dba) <sub>3</sub> | L03B | PMP                 | 3 | P29  | S  | S | -69 | 5  | 20 | 5 | 110 | 1,5 | e |
| 178 | ee(%) | -90 | S24 | Pd <sub>2</sub> (dba) <sub>3</sub> | L02B | PMP                 | 3 | P29  | S  | S | -69 | 5  | 20 | 5 | 110 | 1,5 | e |
| 179 | ee(%) | -71 | S24 | Pd <sub>2</sub> (dba) <sub>3</sub> | L01B | PMP                 | 3 | P29  | S  | S | -69 | 5  | 20 | 5 | 110 | 1,5 | e |
| 180 | ee(%) | -81 | S24 | Pd <sub>2</sub> (dba) <sub>3</sub> | L15B | PMP                 | 3 | P29  | S  | S | -69 | 5  | 20 | 5 | 110 | 1,5 | e |
| 181 | ee(%) | -97 | S24 | Pd <sub>2</sub> (dba) <sub>3</sub> | L16B | PMP                 | 3 | P29  | S  | S | -69 | 5  | 20 | 5 | 110 | 1,5 | e |
| 182 | ee(%) | -93 | S24 | Pd <sub>2</sub> (dba) <sub>3</sub> | L17B | PMP                 | 3 | P29  | S  | S | -69 | 5  | 20 | 5 | 110 | 1,5 | e |
| 183 | ee(%) | -66 | S01 | Pd(OAc) <sub>2</sub>               | L01B | PMP                 | 2 | P01  | S  | S | -48 | 10 | 28 | 2 | 80  | 24  | a |
| 184 | ee(%) | -66 | S01 | Pd(dba) <sub>2</sub>               | L01B | PMP                 | 2 | P01  | S  | S | -69 | 10 | 28 | 2 | 80  | 24  | a |
| 185 | ee(%) | -70 | S01 | Pd(dba) <sub>2</sub>               | L01B | PMP                 | 3 | P01  | S  | S | -69 | 10 | 28 | 2 | 80  | 24  | a |
| 186 | ee(%) | -68 | S01 | Pd(OAc) <sub>2</sub>               | L01B | PMP                 | 3 | P01  | S  | S | -48 | 10 | 28 | 2 | 80  | 48  | a |
| 188 | ee(%) | -63 | S01 | Pd(OAc) <sub>2</sub>               | L01B | Cy <sub>2</sub> NMe | 2 | P01  | S  | S | -48 | 10 | 28 | 2 | 80  | 30  | a |
| 189 | ee(%) | -63 | S01 | Pd(OAc) <sub>2</sub>               | L01B | PMP                 | 2 | P01  | S  | S | -48 | 10 | 28 | 1 | 80  | 48  | a |
| 190 | ee(%) | -63 | S01 | Pd(OAc) <sub>2</sub>               | L01B | PMP                 | 2 | P01  | S  | S | -48 | 10 | 28 | 3 | 80  | 48  | a |
| 191 | ee(%) | -58 | S01 | Pd(OAc) <sub>2</sub>               | L01B | PMP                 | 2 | P01  | S  | S | -48 | 10 | 28 | 2 | 80  | 24  | a |
| 193 | ee(%) | -62 | S01 | Pd(OAc) <sub>2</sub>               | L01B | Et <sub>3</sub> N   | 5 | P01  | S  | S | -48 | 10 | 28 | 2 | 80  | 72  | a |
| 194 | ee(%) | -49 | S01 | Pd(OAc) <sub>2</sub>               | L01B | PMP                 | 2 | P01  | S  | S | -48 | 10 | 28 | 2 | 80  | 31  | a |
| 195 | ee(%) | -40 | S01 | Pd(OAc) <sub>2</sub>               | L01B | PMP                 | 6 | P01  | S  | S | -48 | 10 | 28 | 2 | 80  | 24  | a |
| 196 | ee(%) | -57 | S01 | Pd(OAc) <sub>2</sub>               | L01B | PMP                 | 3 | P01  | S  | S | -48 | 10 | 28 | 2 | 80  | 24  | a |
| 197 | ee(%) | -55 | S01 | Pd(OAc) <sub>2</sub>               | L03B | PMP                 | 2 | P01  | S  | S | -48 | 10 | 28 | 2 | 80  | 31  | a |
| 198 | ee(%) | -11 | S01 | Pd(OAc) <sub>2</sub>               | L04B | PMP                 | 2 | P01  | S  | S | -48 | 10 | 28 | 2 | 80  | 24  | a |
| 199 | ee(%) | -34 | S01 | Pd(OAc) <sub>2</sub>               | L05B | PMP                 | 2 | P01  | SS | S | -43 | 10 | 28 | 2 | 80  | 31  | a |
| 200 | ee(%) | -41 | S01 | Pd(OAc) <sub>2</sub>               | L06B | PMP                 | 1 | P01  | SS | S | -43 | 10 | 28 | 2 | 80  | 48  | a |
| 201 | ee(%) | -53 | S01 | Pd(OAc) <sub>2</sub>               | L06B | Et <sub>3</sub> N   | 1 | P01  | SS | S | -43 | 10 | 28 | 2 | 40  | 72  | a |
| 202 | ee(%) | -28 | S01 | Pd(OAc) <sub>2</sub>               | L06B | Et <sub>3</sub> N   | 2 | P01  | SS | S | -43 | 10 | 28 | 2 | 80  | 24  | a |
| 203 | ee(%) | -57 | S01 | Pd(OAc) <sub>2</sub>               | L06B | Et <sub>3</sub> N   | 4 | P01  | SS | S | -43 | 10 | 28 | 2 | 80  | 72  | a |
| 204 | ee(%) | -55 | S01 | Pd(OAc) <sub>2</sub>               | L06B | Et <sub>3</sub> N   | 4 | P01  | SS | S | -43 | 10 | 28 | 2 | 80  | 72  | a |
| 205 | ee(%) | -46 | S01 | Pd(OAc) <sub>2</sub>               | L06B | PMP                 | 4 | P01  | SS | S | -43 | 10 | 28 | 2 | 40  | 72  | a |
| 206 | ee(%) | -56 | S01 | Pd(OAc) <sub>2</sub>               | L06B | Et <sub>3</sub> N   | 5 | P01  | SS | S | -43 | 10 | 28 | 2 | 80  | 72  | a |
| 207 | ee(%) | -54 | S01 | Pd(OAc) <sub>2</sub>               | L06B | Et <sub>3</sub> N   | 5 | P01  | SS | S | -43 | 10 | 20 | 3 | 80  | 72  | a |
| 208 | ee(%) | -30 | S01 | Pd(OAc) <sub>2</sub>               | L06B | Cy <sub>2</sub> NMe | 1 | P01  | SS | S | -43 | 10 | 20 | 3 | 80  | 48  | a |
| 209 | ee(%) | -37 | S01 | Pd(OAc) <sub>2</sub>               | L06B | Cy <sub>2</sub> NMe | 1 | P01  | SS | S | -43 | 10 | 20 | 2 | 80  | 9   | a |
| 210 | ee(%) | -53 | S01 | Pd(OAc) <sub>2</sub>               | L06B | Cy <sub>2</sub> NMe | 2 | P01  | SS | S | -43 | 10 | 20 | 2 | 80  | 24  | a |
| 211 | ee(%) | -10 | S01 | Pd(OAc) <sub>2</sub>               | L07B | Et <sub>3</sub> N   | 1 | P01  | SS | S | -43 | 10 | 28 | 2 | 80  | 72  | a |
| 212 | ee(%) | -50 | S01 | Pd <sub>2</sub> (dba) <sub>3</sub> | L01B | Et <sub>3</sub> N   | 1 | P01  | S  | S | -69 | 5  | 14 | 2 | 80  | 72  | a |
| 213 | ee(%) | -71 | S12 | Pd(OAc) <sub>2</sub>               | L01B | PMP                 | 2 | P12C | S  | S | -48 | 10 | 28 | 2 | 80  | 48  | a |
| 214 | ee(%) | 69  | S12 | Pd(OAc) <sub>2</sub>               | L01A | PMP                 | 2 | P12C | R  | R | 69  | 10 | 28 | 2 | 80  | 48  | a |
| 215 | ee(%) | -61 | S12 | Pd(OAc) <sub>2</sub>               | L01B | PMP                 | 2 | P12C | S  | S | -48 | 10 | 14 | 2 | 80  | 48  | a |
| 216 | ee(%) | -63 | S02 | Pd(OAc) <sub>2</sub>               | L01B | PMP                 | 2 | P02  | S  | S | -48 | 10 | 28 | 2 | 80  | 48  | a |
| 217 | ee(%) | -72 | S03 | Pd(OAc) <sub>2</sub>               | L01B | PMP                 | 2 | P03  | S  | S | -48 | 10 | 28 | 2 | 80  | 48  | a |
| 218 | ee(%) | -67 | S04 | Pd(OAc) <sub>2</sub>               | L01B | PMP                 | 2 | P04  | S  | S | -48 | 10 | 28 | 2 | 80  | 48  | a |
| 219 | ee(%) | -69 | S05 | Pd(OAc) <sub>2</sub>               | L01B | PMP                 | 2 | P05  | S  | S | -48 | 10 | 28 | 2 | 80  | 48  | a |
| 220 | ee(%) | -7  | S06 | Pd(OAc) <sub>2</sub>               | L01B | PMP                 | 2 | P06  | S  | S | -48 | 10 | 28 | 2 | 80  | 48  | a |
| 221 | ee(%) | -63 | S07 | Pd(OAc) <sub>2</sub>               | L01B | PMP                 | 2 | P07C | S  | S | -48 | 10 | 28 | 2 | 80  | 48  | a |
| 222 | ee(%) | -30 | S08 | Pd(OAc) <sub>2</sub>               | L01B | PMP                 | 2 | P08C | S  | S | -48 | 10 | 28 | 2 | 80  | 48  | a |
| 223 | ee(%) | -71 | S09 | Pd(OAc) <sub>2</sub>               | L01B | PMP                 | 2 | P09C | S  | S | -48 | 10 | 28 | 2 | 80  | 48  | a |
| 224 | ee(%) | -66 | S10 | Pd(OAc) <sub>2</sub>               | L01B | PMP                 | 2 | P10C | S  | S | -48 | 10 | 28 | 2 | 80  | 48  | a |

|     |        |     |     |                                    |      |                                |   |      |    |   |     |     |    |   |     |    |   |
|-----|--------|-----|-----|------------------------------------|------|--------------------------------|---|------|----|---|-----|-----|----|---|-----|----|---|
| 225 | ee(%)  | -61 | S11 | Pd(OAc) <sub>2</sub>               | L01B | PMP                            | 2 | P11C | S  | S | -48 | 10  | 28 | 2 | 80  | 48 | a |
| 226 | ee(%)  | -61 | S12 | Pd(OAc) <sub>2</sub>               | L01B | PMP                            | 2 | P12C | S  | S | -48 | 10  | 28 | 2 | 80  | 48 | a |
| 227 | ee(%)  | -28 | S13 | Pd(OAc) <sub>2</sub>               | L01B | PMP                            | 2 | P13C | S  | S | -48 | 10  | 28 | 2 | 80  | 48 | a |
| 228 | ee(%)  | -64 | S14 | Pd(OAc) <sub>2</sub>               | L01B | PMP                            | 2 | P14C | S  | S | -48 | 10  | 28 | 2 | 80  | 48 | a |
| 229 | ee(%)  | 0   | S15 | Pd(OAc) <sub>2</sub>               | L01B | PMP                            | 2 | P15C | S  | S | -48 | 10  | 28 | 2 | 80  | 48 | a |
| 230 | ee(%)  | -99 | S16 | Pd(OAc) <sub>2</sub>               | L01B | PMP                            | 2 | P16C | S  | S | -48 | 10  | 28 | 2 | 80  | 48 | a |
| 231 | ee(%)  | -64 | S17 | Pd(OAc) <sub>2</sub>               | L01B | PMP                            | 2 | P17C | S  | S | -48 | 10  | 28 | 2 | 80  | 48 | a |
| 232 | ee(%)  | 0   | S18 | Pd(OAc) <sub>2</sub>               | L01B | PMP                            | 2 | P18C | S  | S | -48 | 10  | 28 | 2 | 80  | 48 | a |
| 233 | ee(%)  | 0   | S19 | Pd(OAc) <sub>2</sub>               | L01B | PMP                            | 2 | P19C | S  | S | -48 | 10  | 28 | 2 | 80  | 48 | a |
| 234 | ee(%)  | 0   | S20 | Pd(OAc) <sub>2</sub>               | L01B | PMP                            | 2 | P20C | S  | S | -48 | 10  | 28 | 2 | 80  | 48 | a |
| 235 | ee(%)  | -56 | S01 | Pd(OAc) <sub>2</sub>               | L01B | Et <sub>3</sub> N              | 1 | P01  | S  | S | -48 | 5   | 14 | 2 | 80  | 72 | a |
| 236 | ee(%)  | 68  | S21 | Pd <sub>2</sub> (dba) <sub>3</sub> | L01A | PMP                            | 6 | P21  | R  | R | 68  | 2,5 | 10 | 8 | 110 | 12 | b |
| 237 | ee(%)  | 68  | S22 | Pd <sub>2</sub> (dba) <sub>3</sub> | L01A | PMP                            | 6 | P23C | R  | R | 68  | 5   | 10 | 5 | 110 | 48 | c |
| 238 | ee(%)  | -90 | S23 | Pd <sub>2</sub> (dba) <sub>3</sub> | L01B | PMP                            | 6 | P30  | S  | S | -69 | 5   | 10 | 5 | 110 | 48 | c |
| 239 | ee(%)  | -63 | S01 | Pd(OAc) <sub>2</sub>               | L01B | Et <sub>3</sub> N              | 1 | P01  | S  | S | -48 | 10  | 28 | 2 | 80  | 72 | a |
| 241 | ee(%)  | -96 | S26 | Pd <sub>2</sub> (dba) <sub>3</sub> | L01B | PMP                            | 6 | P27C | S  | S | -69 | 5   | 10 | 5 | 110 | 72 | c |
| 242 | ee(%)  | -71 | S27 | Pd <sub>2</sub> (dba) <sub>3</sub> | L01B | PMP                            | 6 | P28C | S  | S | -69 | 5   | 10 | 5 | 110 | 72 | c |
| 243 | ee(%)  | -16 | S24 | Pd <sub>2</sub> (dba) <sub>3</sub> | L01B | PMP                            | 6 | P29  | S  | S | -69 | 5   | 10 | 5 | 110 | 48 | c |
| 244 | ee(%)  | -60 | S24 | Pd <sub>2</sub> (dba) <sub>3</sub> | L01B | PMP                            | 6 | P29  | S  | S | -69 | 5   | 10 | 5 | 60  | 48 | c |
| 245 | ee(%)  | -7  | S24 | Pd <sub>2</sub> (dba) <sub>3</sub> | L01B | PMP                            | 6 | P29  | S  | S | -69 | 5   | 10 | 5 | 60  | 48 | c |
| 246 | ee(%)  | -69 | S24 | Pd <sub>2</sub> (dba) <sub>3</sub> | L01B | K <sub>2</sub> CO <sub>3</sub> | 6 | P29  | S  | S | -69 | 5   | 10 | 5 | 110 | 72 | c |
| 247 | ee(%)  | 24  | S23 | Pd <sub>2</sub> (dba) <sub>3</sub> | L05B | PMP                            | 6 | P24  | SS | R | 51  | 5   | 10 | 5 | 110 | 72 | c |
| 248 | ee(%)  | 77  | S25 | Pd <sub>2</sub> (dba) <sub>3</sub> | L05B | PMP                            | 6 | P26  | SS | R | 51  | 5   | 10 | 5 | 110 | 96 | c |
| 249 | ee(%)  | 0   | S01 | Pd(OAc) <sub>2</sub>               | L01B | PMP                            | 1 | P01  | S  | S | -48 | 10  | 28 | 2 | 80  | 72 | a |
| 250 | ee(%)  | 0   | S25 | Pd <sub>2</sub> (dba) <sub>3</sub> | L01B | K <sub>2</sub> CO <sub>3</sub> | 6 | P31  | S  | S | -69 | 5   | 10 | 5 | 110 | 96 | c |
| 251 | ee(%)  | 72  | S24 | Pd <sub>2</sub> (dba) <sub>3</sub> | L01A | PMP                            | 6 | P25  | R  | R | 68  | 5   | 20 | 5 | 110 | 48 | d |
| 252 | ee(%)  | 0   | S24 | Pd <sub>2</sub> (dba) <sub>3</sub> | L08A | PMP                            | 6 | P29  | R  | S | -49 | 5   | 20 | 5 | 110 | 48 | d |
| 253 | ee(%)  | -74 | S24 | Pd <sub>2</sub> (dba) <sub>3</sub> | L09A | PMP                            | 6 | P29  | R  | S | -49 | 5   | 20 | 5 | 110 | 48 | d |
| 254 | ee(%)  | -46 | S24 | Pd <sub>2</sub> (dba) <sub>3</sub> | L10A | PMP                            | 6 | P29  | R  | S | -49 | 5   | 20 | 5 | 110 | 48 | d |
| 255 | ee(%)  | -14 | S24 | Pd <sub>2</sub> (dba) <sub>3</sub> | L11A | PMP                            | 6 | P29  | R  | S | -49 | 5   | 20 | 5 | 110 | 48 | d |
| 256 | ee(%)  | -28 | S24 | Pd <sub>2</sub> (dba) <sub>3</sub> | L03B | PMP                            | 6 | P29  | S  | S | -69 | 5   | 20 | 5 | 110 | 48 | d |
| 257 | ee(%)  | 29  | S24 | Pd <sub>2</sub> (dba) <sub>3</sub> | L12B | PMP                            | 6 | P25  | S  | R | 35  | 5   | 20 | 5 | 110 | 48 | d |
| 258 | ee(%)  | -47 | S24 | Pd <sub>2</sub> (dba) <sub>3</sub> | L12A | PMP                            | 6 | P29  | R  | S | -49 | 5   | 20 | 5 | 110 | 48 | d |
| 259 | ee(%)  | 40  | S24 | Pd <sub>2</sub> (dba) <sub>3</sub> | L13B | PMP                            | 6 | P25  | S  | R | 35  | 5   | 20 | 5 | 110 | 44 | d |
| 260 | ee(%)  | -29 | S01 | Pd(OAc) <sub>2</sub>               | L01B | Et <sub>3</sub> N              | 1 | P01  | S  | S | -48 | 10  | 28 | 2 | 110 | 72 | a |
| 381 | Yld(%) | 5   | S01 | Pd(OAc) <sub>2</sub>               | L01A | Et <sub>3</sub> N              | 1 | P01  | R  | R | 36  | 5   | 14 | 2 | 80  | 72 | a |
| 382 | Yld(%) | 17  | S01 | Pd(OAc) <sub>2</sub>               | L01A | Et <sub>3</sub> N              | 1 | P01  | R  | R | 36  | 10  | 28 | 2 | 80  | 72 | a |
| 383 | Yld(%) | 7   | S01 | Pd(OAc) <sub>2</sub>               | L01A | PMP                            | 1 | P01  | R  | R | 36  | 10  | 28 | 2 | 80  | 72 | a |
| 384 | Yld(%) | 3   | S01 | Pd(OAc) <sub>2</sub>               | L01A | Et <sub>3</sub> N              | 1 | P01  | R  | R | 36  | 10  | 28 | 2 | 110 | 72 | a |
| 385 | Yld(%) | 8   | S01 | Pd(OAc) <sub>2</sub>               | L01A | Cy <sub>2</sub> NMe            | 1 | P01  | R  | R | 36  | 10  | 28 | 2 | 80  | 72 | a |
| 386 | Yld(%) | 0   | S01 | Pd(OAc) <sub>2</sub>               | L01A | Et <sub>3</sub> N              | 1 | P01  | R  | R | 36  | 10  | 28 | 2 | 80  | 72 | a |
| 387 | Yld(%) | 33  | S01 | Pd(OAc) <sub>2</sub>               | L01A | Et <sub>3</sub> N              | 2 | P01  | R  | R | 36  | 10  | 28 | 2 | 80  | 72 | a |
| 388 | Yld(%) | 70  | S01 | Pd(OAc) <sub>2</sub>               | L01A | PMP                            | 2 | P01  | R  | R | 36  | 10  | 28 | 2 | 80  | 24 | a |
| 389 | Yld(%) | 72  | S01 | Pd(OAc) <sub>2</sub>               | L01A | PMP                            | 2 | P01  | R  | R | 36  | 10  | 28 | 2 | 80  | 24 | a |
| 390 | Yld(%) | 82  | S01 | Pd <sub>2</sub> (dba) <sub>3</sub> | L01A | PMP                            | 2 | P01  | R  | R | 48  | 10  | 28 | 2 | 80  | 24 | a |
| 391 | Yld(%) | 66  | S01 | Pd(dba) <sub>2</sub>               | L01A | PMP                            | 3 | P01  | R  | R | 48  | 10  | 28 | 2 | 80  | 24 | a |

|     |        |    |     |                                    |      |                     |   |     |    |   |    |    |    |   |    |    |   |
|-----|--------|----|-----|------------------------------------|------|---------------------|---|-----|----|---|----|----|----|---|----|----|---|
| 392 | Yld(%) | 11 | S01 | Pd(OAc) <sub>2</sub>               | L01A | PMP                 | 3 | P01 | R  | R | 36 | 10 | 28 | 2 | 80 | 48 | a |
| 393 | Yld(%) | 10 | S01 | Pd(OAc) <sub>2</sub>               | L01A | PMP                 | 2 | P01 | R  | R | 36 | 10 | 28 | 2 | 40 | 72 | a |
| 394 | Yld(%) | 65 | S01 | Pd(OAc) <sub>2</sub>               | L01A | Cy <sub>2</sub> NMe | 2 | P01 | R  | R | 36 | 10 | 28 | 2 | 80 | 30 | a |
| 395 | Yld(%) | 76 | S01 | Pd(OAc) <sub>2</sub>               | L01A | PMP                 | 2 | P01 | R  | R | 36 | 10 | 28 | 1 | 80 | 48 | a |
| 396 | Yld(%) | 43 | S01 | Pd(OAc) <sub>2</sub>               | L01A | PMP                 | 2 | P01 | R  | R | 36 | 10 | 28 | 3 | 80 | 48 | a |
| 397 | Yld(%) | 46 | S01 | Pd(OAc) <sub>2</sub>               | L01A | PMP                 | 2 | P01 | R  | R | 36 | 10 | 28 | 2 | 80 | 24 | a |
| 398 | Yld(%) | 13 | S01 | Pd(OAc) <sub>2</sub>               | L01A | Et <sub>3</sub> N   | 4 | P01 | R  | R | 36 | 10 | 28 | 2 | 80 | 72 | a |
| 399 | Yld(%) | 19 | S01 | Pd(OAc) <sub>2</sub>               | L01A | Et <sub>3</sub> N   | 5 | P01 | R  | R | 36 | 10 | 28 | 2 | 80 | 72 | a |
| 400 | Yld(%) | 75 | S01 | Pd(OAc) <sub>2</sub>               | L01A | PMP                 | 2 | P01 | R  | R | 36 | 10 | 28 | 2 | 80 | 31 | a |
| 401 | Yld(%) | 5  | S01 | Pd(OAc) <sub>2</sub>               | L01A | PMP                 | 6 | P01 | R  | R | 36 | 10 | 28 | 2 | 80 | 24 | a |
| 402 | Yld(%) | 33 | S01 | Pd(OAc) <sub>2</sub>               | L01A | PMP                 | 3 | P01 | R  | R | 36 | 10 | 28 | 2 | 80 | 24 | a |
| 403 | Yld(%) | 54 | S01 | Pd(OAc) <sub>2</sub>               | L03A | PMP                 | 2 | P01 | R  | R | 36 | 10 | 28 | 2 | 80 | 31 | a |
| 404 | Yld(%) | 70 | S01 | Pd(OAc) <sub>2</sub>               | L04A | PMP                 | 2 | P01 | R  | R | 36 | 10 | 28 | 2 | 80 | 24 | a |
| 405 | Yld(%) | 18 | S01 | Pd(OAc) <sub>2</sub>               | L05A | PMP                 | 2 | P01 | RR | R | 37 | 10 | 28 | 2 | 80 | 31 | a |
| 406 | Yld(%) | 73 | S01 | Pd(OAc) <sub>2</sub>               | L06A | PMP                 | 1 | P01 | RR | R | 37 | 10 | 28 | 2 | 80 | 48 | a |
| 407 | Yld(%) | 59 | S01 | Pd(OAc) <sub>2</sub>               | L06A | Et <sub>3</sub> N   | 1 | P01 | RR | R | 37 | 10 | 28 | 2 | 40 | 72 | a |
| 408 | Yld(%) | 44 | S01 | Pd(OAc) <sub>2</sub>               | L06A | Et <sub>3</sub> N   | 2 | P01 | RR | R | 37 | 10 | 28 | 2 | 80 | 24 | a |
| 409 | Yld(%) | 69 | S01 | Pd(OAc) <sub>2</sub>               | L06A | Et <sub>3</sub> N   | 4 | P01 | RR | R | 37 | 10 | 28 | 2 | 80 | 72 | a |
| 410 | Yld(%) | 43 | S01 | Pd(OAc) <sub>2</sub>               | L06A | Et <sub>3</sub> N   | 4 | P01 | RR | R | 37 | 10 | 28 | 2 | 80 | 72 | a |
| 411 | Yld(%) | 24 | S01 | Pd(OAc) <sub>2</sub>               | L06A | PMP                 | 4 | P01 | RR | R | 37 | 10 | 28 | 2 | 40 | 72 | a |
| 412 | Yld(%) | 18 | S01 | Pd(OAc) <sub>2</sub>               | L06A | Et <sub>3</sub> N   | 5 | P01 | RR | R | 37 | 10 | 28 | 2 | 80 | 72 | a |
| 413 | Yld(%) | 8  | S01 | Pd(OAc) <sub>2</sub>               | L06A | Et <sub>3</sub> N   | 5 | P01 | RR | R | 37 | 10 | 20 | 3 | 80 | 72 | a |
| 414 | Yld(%) | 75 | S01 | Pd(OAc) <sub>2</sub>               | L06A | Cy <sub>2</sub> NMe | 1 | P01 | RR | R | 37 | 10 | 20 | 3 | 80 | 48 | a |
| 415 | Yld(%) | 34 | S01 | Pd(OAc) <sub>2</sub>               | L06A | Cy <sub>2</sub> NMe | 1 | P01 | RR | R | 37 | 10 | 20 | 2 | 80 | 9  | a |
| 416 | Yld(%) | 8  | S01 | Pd(OAc) <sub>2</sub>               | L06A | Cy <sub>2</sub> NMe | 2 | P01 | RR | R | 37 | 10 | 20 | 2 | 80 | 24 | a |
| 417 | Yld(%) | 9  | S01 | Pd(OAc) <sub>2</sub>               | L07A | Et <sub>3</sub> N   | 1 | P01 | RR | R | 37 | 10 | 28 | 2 | 80 | 72 | a |
| 418 | Yld(%) | 4  | S01 | Pd <sub>2</sub> (dba) <sub>3</sub> | L01A | Et <sub>3</sub> N   | 1 | P01 | R  | R | 48 | 5  | 14 | 2 | 80 | 72 | a |
| 419 | Yld(%) | 66 | S12 | Pd(OAc) <sub>2</sub>               | L01A | PMP                 | 2 | P12 | R  | R | 36 | 10 | 28 | 2 | 80 | 48 | a |
| 420 | Yld(%) | 51 | S12 | Pd(OAc) <sub>2</sub>               | L01B | PMP                 | 2 | P12 | S  | S | 51 | 10 | 28 | 2 | 80 | 48 | a |
| 421 | Yld(%) | 54 | S12 | Pd(OAc) <sub>2</sub>               | L01A | PMP                 | 2 | P12 | R  | R | 36 | 10 | 14 | 2 | 80 | 48 | a |
| 422 | Yld(%) | 58 | S02 | Pd(OAc) <sub>2</sub>               | L01A | PMP                 | 2 | P02 | R  | R | 36 | 10 | 28 | 2 | 80 | 48 | a |
| 423 | Yld(%) | 38 | S03 | Pd(OAc) <sub>2</sub>               | L01A | PMP                 | 2 | P03 | R  | R | 36 | 10 | 28 | 2 | 80 | 48 | a |
| 424 | Yld(%) | 60 | S04 | Pd(OAc) <sub>2</sub>               | L01A | PMP                 | 2 | P04 | R  | R | 36 | 10 | 28 | 2 | 80 | 48 | a |
| 425 | Yld(%) | 60 | S05 | Pd(OAc) <sub>2</sub>               | L01A | PMP                 | 2 | P05 | R  | R | 36 | 10 | 28 | 2 | 80 | 48 | a |
| 426 | Yld(%) | 55 | S06 | Pd(OAc) <sub>2</sub>               | L01A | PMP                 | 2 | P06 | R  | R | 36 | 10 | 28 | 2 | 80 | 48 | a |
| 427 | Yld(%) | 51 | S07 | Pd(OAc) <sub>2</sub>               | L01A | PMP                 | 2 | P07 | R  | R | 36 | 10 | 28 | 2 | 80 | 48 | a |
| 428 | Yld(%) | 13 | S08 | Pd(OAc) <sub>2</sub>               | L01A | PMP                 | 2 | P08 | R  | R | 36 | 10 | 28 | 2 | 80 | 48 | a |
| 429 | Yld(%) | 66 | S09 | Pd(OAc) <sub>2</sub>               | L01A | PMP                 | 2 | P09 | R  | R | 36 | 10 | 28 | 2 | 80 | 48 | a |
| 430 | Yld(%) | 46 | S10 | Pd(OAc) <sub>2</sub>               | L01A | PMP                 | 2 | P10 | R  | R | 36 | 10 | 28 | 2 | 80 | 48 | a |
| 431 | Yld(%) | 54 | S11 | Pd(OAc) <sub>2</sub>               | L01A | PMP                 | 2 | P11 | R  | R | 36 | 10 | 28 | 2 | 80 | 48 | a |
| 432 | Yld(%) | 68 | S12 | Pd(OAc) <sub>2</sub>               | L01A | PMP                 | 2 | P12 | R  | R | 36 | 10 | 28 | 2 | 80 | 48 | a |
| 433 | Yld(%) | 10 | S13 | Pd(OAc) <sub>2</sub>               | L01A | PMP                 | 2 | P13 | R  | R | 36 | 10 | 28 | 2 | 80 | 48 | a |
| 434 | Yld(%) | 49 | S14 | Pd(OAc) <sub>2</sub>               | L01A | PMP                 | 2 | P14 | R  | R | 36 | 10 | 28 | 2 | 80 | 48 | a |
| 435 | Yld(%) | 0  | S15 | Pd(OAc) <sub>2</sub>               | L01A | PMP                 | 2 | P15 | R  | R | 36 | 10 | 28 | 2 | 80 | 48 | a |
| 436 | Yld(%) | 11 | S16 | Pd(OAc) <sub>2</sub>               | L01A | PMP                 | 2 | P16 | R  | R | 36 | 10 | 28 | 2 | 80 | 48 | a |
| 437 | Yld(%) | 45 | S17 | Pd(OAc) <sub>2</sub>               | L01A | PMP                 | 2 | P17 | R  | R | 36 | 10 | 28 | 2 | 80 | 48 | a |



|     |        |    |     |                                    |      |                                |    |     |    |   |    |     |    |   |     |     |   |
|-----|--------|----|-----|------------------------------------|------|--------------------------------|----|-----|----|---|----|-----|----|---|-----|-----|---|
| 438 | Yld(%) | 0  | S18 | Pd(OAc) <sub>2</sub>               | L01A | PMP                            | 2  | P18 | R  | R | 36 | 10  | 28 | 2 | 80  | 48  | a |
| 439 | Yld(%) | 0  | S19 | Pd(OAc) <sub>2</sub>               | L01A | PMP                            | 2  | P19 | R  | R | 36 | 10  | 28 | 2 | 80  | 48  | a |
| 440 | Yld(%) | 0  | S20 | Pd(OAc) <sub>2</sub>               | L01A | PMP                            | 2  | P20 | R  | R | 36 | 10  | 28 | 2 | 80  | 48  | a |
| 441 | Yld(%) | 82 | S21 | Pd <sub>2</sub> (dba) <sub>3</sub> | L01B | PMP                            | 6  | P22 | S  | S | 71 | 2,5 | 10 | 8 | 110 | 12  | b |
| 442 | Yld(%) | 78 | S23 | Pd <sub>2</sub> (dba) <sub>3</sub> | L01A | PMP                            | 6  | P24 | R  | R | 48 | 5   | 10 | 5 | 110 | 48  | c |
| 443 | Yld(%) | 83 | S24 | Pd <sub>2</sub> (dba) <sub>3</sub> | L01A | PMP                            | 6  | P25 | R  | R | 48 | 5   | 10 | 5 | 110 | 48  | c |
| 444 | Yld(%) | 7  | S25 | Pd <sub>2</sub> (dba) <sub>3</sub> | L01A | PMP                            | 6  | P26 | R  | R | 48 | 5   | 10 | 5 | 110 | 72  | c |
| 445 | Yld(%) | 71 | S26 | Pd <sub>2</sub> (dba) <sub>3</sub> | L01A | PMP                            | 6  | P27 | R  | R | 48 | 5   | 10 | 5 | 110 | 72  | c |
| 446 | Yld(%) | 68 | S27 | Pd <sub>2</sub> (dba) <sub>3</sub> | L01A | PMP                            | 6  | P28 | R  | R | 48 | 5   | 10 | 5 | 110 | 72  | c |
| 447 | Yld(%) | 63 | S24 | Pd <sub>2</sub> (dba) <sub>3</sub> | L01A | PMP                            | 6  | P25 | R  | R | 48 | 5   | 10 | 5 | 110 | 48  | c |
| 448 | Yld(%) | 60 | S24 | Pd <sub>2</sub> (dba) <sub>3</sub> | L01A | PMP                            | 6  | P25 | R  | R | 48 | 5   | 10 | 5 | 60  | 48  | c |
| 449 | Yld(%) | 54 | S24 | Pd <sub>2</sub> (dba) <sub>3</sub> | L01A | PMP                            | 6  | P25 | R  | R | 48 | 5   | 10 | 5 | 60  | 48  | c |
| 450 | Yld(%) | 74 | S24 | Pd <sub>2</sub> (dba) <sub>3</sub> | L01A | K <sub>2</sub> CO <sub>3</sub> | 6  | P25 | R  | R | 48 | 5   | 10 | 5 | 110 | 72  | c |
| 451 | Yld(%) | 61 | S23 | Pd <sub>2</sub> (dba) <sub>3</sub> | L05A | PMP                            | 6  | P30 | RR | S | 64 | 5   | 10 | 5 | 110 | 72  | c |
| 452 | Yld(%) | 66 | S25 | Pd <sub>2</sub> (dba) <sub>3</sub> | L05A | PMP                            | 6  | P31 | RR | S | 64 | 5   | 10 | 5 | 110 | 96  | c |
| 453 | Yld(%) | 0  | S25 | Pd <sub>2</sub> (dba) <sub>3</sub> | L01A | K <sub>2</sub> CO <sub>3</sub> | 6  | P26 | R  | R | 48 | 5   | 10 | 5 | 110 | 96  | c |
| 454 | Yld(%) | 88 | S24 | Pd <sub>2</sub> (dba) <sub>3</sub> | L01B | PMP                            | 6  | P29 | S  | S | 71 | 5   | 20 | 5 | 110 | 48  | d |
| 455 | Yld(%) | 0  | S24 | Pd <sub>2</sub> (dba) <sub>3</sub> | L08B | PMP                            | 6  | P25 | S  | R | 68 | 5   | 20 | 5 | 110 | 48  | d |
| 456 | Yld(%) | 93 | S24 | Pd <sub>2</sub> (dba) <sub>3</sub> | L09B | PMP                            | 6  | P25 | S  | R | 68 | 5   | 20 | 5 | 110 | 48  | d |
| 457 | Yld(%) | 84 | S24 | Pd <sub>2</sub> (dba) <sub>3</sub> | L10B | PMP                            | 6  | P25 | S  | R | 68 | 5   | 20 | 5 | 110 | 48  | d |
| 458 | Yld(%) | 73 | S24 | Pd <sub>2</sub> (dba) <sub>3</sub> | L11B | PMP                            | 6  | P25 | S  | R | 68 | 5   | 20 | 5 | 110 | 48  | d |
| 459 | Yld(%) | 42 | S24 | Pd <sub>2</sub> (dba) <sub>3</sub> | L03A | PMP                            | 6  | P25 | R  | R | 48 | 5   | 20 | 5 | 110 | 48  | d |
| 460 | Yld(%) | 90 | S24 | Pd <sub>2</sub> (dba) <sub>3</sub> | L12A | PMP                            | 6  | P29 | R  | S | 89 | 5   | 20 | 5 | 110 | 48  | d |
| 461 | Yld(%) | 77 | S24 | Pd <sub>2</sub> (dba) <sub>3</sub> | L12B | PMP                            | 6  | P25 | S  | R | 68 | 5   | 20 | 5 | 110 | 48  | d |
| 462 | Yld(%) | 88 | S24 | Pd <sub>2</sub> (dba) <sub>3</sub> | L13A | PMP                            | 6  | P29 | R  | S | 89 | 5   | 20 | 5 | 110 | 48  | d |
| 463 | Yld(%) | 98 | S24 | Pd <sub>2</sub> (dba) <sub>3</sub> | L03A | PMP                            | 6  | P25 | R  | R | 48 | 5   | 20 | 5 | 110 | 44  | e |
| 464 | Yld(%) | 42 | S24 | Pd <sub>2</sub> (dba) <sub>3</sub> | L14B | PMP                            | 6  | P29 | S  | S | 71 | 5   | 20 | 5 | 110 | 44  | e |
| 465 | Yld(%) | 53 | S24 | Pd <sub>2</sub> (dba) <sub>3</sub> | L02A | PMP                            | 6  | P25 | R  | R | 48 | 5   | 20 | 5 | 110 | 44  | e |
| 466 | Yld(%) | 91 | S24 | Pd <sub>2</sub> (dba) <sub>3</sub> | L01A | PMP                            | 6  | P25 | R  | R | 48 | 5   | 20 | 5 | 110 | 44  | e |
| 467 | Yld(%) | 93 | S24 | Pd <sub>2</sub> (dba) <sub>3</sub> | L15A | PMP                            | 6  | P25 | R  | R | 48 | 5   | 20 | 5 | 110 | 44  | e |
| 468 | Yld(%) | 54 | S24 | Pd <sub>2</sub> (dba) <sub>3</sub> | L19A | PMP                            | 6  | P25 | R  | R | 48 | 5   | 20 | 5 | 110 | 44  | e |
| 469 | Yld(%) | 76 | S24 | Pd <sub>2</sub> (dba) <sub>3</sub> | L16A | PMP                            | 6  | P25 | R  | R | 48 | 5   | 20 | 5 | 110 | 44  | e |
| 470 | Yld(%) | 59 | S24 | Pd <sub>2</sub> (dba) <sub>3</sub> | L17A | PMP                            | 6  | P25 | R  | R | 48 | 5   | 20 | 5 | 110 | 44  | e |
| 471 | Yld(%) | 18 | S24 | Pd <sub>2</sub> (dba) <sub>3</sub> | L18A | PMP                            | 6  | P25 | R  | R | 48 | 5   | 20 | 5 | 110 | 44  | e |
| 472 | Yld(%) | 55 | S24 | Pd <sub>2</sub> (dba) <sub>3</sub> | L03A | PMP                            | 3  | P25 | R  | R | 48 | 5   | 20 | 5 | 110 | 1,5 | e |
| 473 | Yld(%) | 80 | S24 | Pd <sub>2</sub> (dba) <sub>3</sub> | L14B | PMP                            | 3  | P25 | S  | R | 68 | 5   | 20 | 5 | 110 | 1,5 | e |
| 474 | Yld(%) | 35 | S24 | Pd <sub>2</sub> (dba) <sub>3</sub> | L02A | PMP                            | 3  | P25 | R  | R | 48 | 5   | 20 | 5 | 110 | 1,5 | e |
| 475 | Yld(%) | 35 | S24 | Pd <sub>2</sub> (dba) <sub>3</sub> | L01A | PMP                            | 3  | P25 | R  | R | 48 | 5   | 20 | 5 | 110 | 1,5 | e |
| 476 | Yld(%) | 56 | S24 | Pd <sub>2</sub> (dba) <sub>3</sub> | L15A | PMP                            | 3  | P25 | R  | R | 48 | 5   | 20 | 5 | 110 | 1,5 | e |
| 477 | Yld(%) | 56 | S24 | Pd <sub>2</sub> (dba) <sub>3</sub> | L19A | PMP                            | 3  | P25 | R  | R | 48 | 5   | 20 | 5 | 110 | 1,5 | e |
| 478 | Yld(%) | 6  | S24 | Pd <sub>2</sub> (dba) <sub>3</sub> | L16A | PMP                            | 3  | P25 | R  | R | 48 | 5   | 20 | 5 | 110 | 1,5 | e |
| 479 | Yld(%) | 19 | S24 | Pd <sub>2</sub> (dba) <sub>3</sub> | L17A | PMP                            | 3  | P25 | R  | R | 48 | 5   | 20 | 5 | 110 | 1,5 | e |
| 480 | Yld(%) | 18 | S24 | Pd <sub>2</sub> (dba) <sub>3</sub> | L18A | PMP                            | 3  | P25 | R  | R | 48 | 5   | 20 | 5 | 110 | 1,5 | e |
| 481 | Yld(%) | 0  | S24 | Pd <sub>2</sub> (dba) <sub>3</sub> | L01A | PMP                            | 9  | P25 | R  | R | 48 | 5   | 20 | 5 | 110 | 1,5 | e |
| 482 | Yld(%) | 9  | S24 | Pd <sub>2</sub> (dba) <sub>3</sub> | L01A | PMP                            | 10 | P25 | R  | R | 48 | 5   | 20 | 5 | 110 | 1,5 | e |
| 483 | Yld(%) | 24 | S24 | Pd <sub>2</sub> (dba) <sub>3</sub> | L01A | PMP                            | 1  | P25 | R  | R | 48 | 5   | 20 | 5 | 110 | 1,5 | e |
| 484 | Yld(%) | 71 | S24 | Pd <sub>2</sub> (dba) <sub>3</sub> | L01A | PMP                            | 6  | P25 | R  | R | 48 | 5   | 20 | 5 | 110 | 1,5 | e |

|     |        |     |     |                                    |      |                     |    |     |   |   |    |    |    |   |     |     |   |
|-----|--------|-----|-----|------------------------------------|------|---------------------|----|-----|---|---|----|----|----|---|-----|-----|---|
| 485 | Yld(%) | 46  | S24 | Pd <sub>2</sub> (dba) <sub>3</sub> | L01A | PMP                 | 3  | P25 | R | R | 48 | 5  | 20 | 5 | 110 | 1,5 | e |
| 486 | Yld(%) | 57  | S24 | Pd <sub>2</sub> (dba) <sub>3</sub> | L01A | PMP                 | 11 | P25 | R | R | 48 | 5  | 20 | 5 | 110 | 1,5 | e |
| 487 | Yld(%) | 96  | S24 | Pd <sub>2</sub> (dba) <sub>3</sub> | L03A | PMP                 | 6  | P25 | R | R | 48 | 5  | 20 | 5 | 110 | 44  | e |
| 488 | Yld(%) | 50  | S24 | Pd <sub>2</sub> (dba) <sub>3</sub> | L02A | PMP                 | 6  | P25 | R | R | 48 | 5  | 20 | 5 | 110 | 44  | e |
| 489 | Yld(%) | 87  | S24 | Pd <sub>2</sub> (dba) <sub>3</sub> | L01A | PMP                 | 6  | P25 | R | R | 48 | 5  | 20 | 5 | 110 | 44  | e |
| 490 | Yld(%) | 91  | S24 | Pd <sub>2</sub> (dba) <sub>3</sub> | L15A | PMP                 | 6  | P25 | R | R | 48 | 5  | 20 | 5 | 110 | 44  | e |
| 491 | Yld(%) | 58  | S24 | Pd <sub>2</sub> (dba) <sub>3</sub> | L16A | PMP                 | 6  | P25 | R | R | 48 | 5  | 20 | 5 | 110 | 44  | e |
| 492 | Yld(%) | 58  | S24 | Pd <sub>2</sub> (dba) <sub>3</sub> | L17A | PMP                 | 6  | P25 | R | R | 48 | 5  | 20 | 5 | 110 | 44  | e |
| 493 | Yld(%) | 96  | S24 | Pd <sub>2</sub> (dba) <sub>3</sub> | L03A | PMP                 | 6  | P25 | R | R | 48 | 5  | 20 | 5 | 110 | 44  | e |
| 494 | Yld(%) | 39  | S24 | Pd <sub>2</sub> (dba) <sub>3</sub> | L02A | PMP                 | 6  | P25 | R | R | 48 | 5  | 20 | 5 | 110 | 44  | e |
| 495 | Yld(%) | 54  | S24 | Pd <sub>2</sub> (dba) <sub>3</sub> | L01A | PMP                 | 6  | P25 | R | R | 48 | 5  | 20 | 5 | 110 | 44  | e |
| 496 | Yld(%) | 70  | S24 | Pd <sub>2</sub> (dba) <sub>3</sub> | L15A | PMP                 | 6  | P25 | R | R | 48 | 5  | 20 | 5 | 110 | 44  | e |
| 497 | Yld(%) | 16  | S24 | Pd <sub>2</sub> (dba) <sub>3</sub> | L16A | PMP                 | 6  | P25 | R | R | 48 | 5  | 20 | 5 | 110 | 44  | e |
| 498 | Yld(%) | 3   | S24 | Pd <sub>2</sub> (dba) <sub>3</sub> | L17A | PMP                 | 6  | P25 | R | R | 48 | 5  | 20 | 5 | 110 | 44  | e |
| 499 | Yld(%) | 45  | S24 | Pd <sub>2</sub> (dba) <sub>3</sub> | L03A | PMP                 | 3  | P25 | R | R | 48 | 5  | 20 | 5 | 110 | 1,5 | e |
| 500 | Yld(%) | 31  | S24 | Pd <sub>2</sub> (dba) <sub>3</sub> | L02A | PMP                 | 3  | P25 | R | R | 48 | 5  | 20 | 5 | 110 | 1,5 | e |
| 501 | Yld(%) | 52  | S24 | Pd <sub>2</sub> (dba) <sub>3</sub> | L01A | PMP                 | 3  | P25 | R | R | 48 | 5  | 20 | 5 | 110 | 1,5 | e |
| 502 | Yld(%) | 63  | S24 | Pd <sub>2</sub> (dba) <sub>3</sub> | L15A | PMP                 | 3  | P25 | R | R | 48 | 5  | 20 | 5 | 110 | 1,5 | e |
| 503 | Yld(%) | 3   | S24 | Pd <sub>2</sub> (dba) <sub>3</sub> | L16A | PMP                 | 3  | P25 | R | R | 48 | 5  | 20 | 5 | 110 | 1,5 | e |
| 504 | Yld(%) | 9   | S24 | Pd <sub>2</sub> (dba) <sub>3</sub> | L17A | PMP                 | 3  | P25 | R | R | 48 | 5  | 20 | 5 | 110 | 1,5 | e |
| 505 | Yld(%) | 51  | S24 | Pd <sub>2</sub> (dba) <sub>3</sub> | L03A | PMP                 | 3  | P25 | R | R | 48 | 5  | 20 | 5 | 110 | 1,5 | e |
| 506 | Yld(%) | 16  | S24 | Pd <sub>2</sub> (dba) <sub>3</sub> | L02A | PMP                 | 3  | P25 | R | R | 48 | 5  | 20 | 5 | 110 | 1,5 | e |
| 507 | Yld(%) | 33  | S24 | Pd <sub>2</sub> (dba) <sub>3</sub> | L01A | PMP                 | 3  | P25 | R | R | 48 | 5  | 20 | 5 | 110 | 1,5 | e |
| 508 | Yld(%) | 47  | S24 | Pd <sub>2</sub> (dba) <sub>3</sub> | L15A | PMP                 | 3  | P25 | R | R | 48 | 5  | 20 | 5 | 110 | 1,5 | e |
| 509 | Yld(%) | 0,4 | S24 | Pd <sub>2</sub> (dba) <sub>3</sub> | L16A | PMP                 | 3  | P25 | R | R | 48 | 5  | 20 | 5 | 110 | 1,5 | e |
| 510 | Yld(%) | 4   | S24 | Pd <sub>2</sub> (dba) <sub>3</sub> | L17A | PMP                 | 3  | P25 | R | R | 48 | 5  | 20 | 5 | 110 | 1,5 | e |
| 511 | Yld(%) | 98  | S24 | Pd <sub>2</sub> (dba) <sub>3</sub> | L03B | PMP                 | 6  | P29 | S | S | 48 | 5  | 20 | 5 | 110 | 44  | e |
| 512 | Yld(%) | 42  | S24 | Pd <sub>2</sub> (dba) <sub>3</sub> | L14A | PMP                 | 6  | P25 | R | R | 71 | 5  | 20 | 5 | 110 | 44  | e |
| 513 | Yld(%) | 53  | S24 | Pd <sub>2</sub> (dba) <sub>3</sub> | L02B | PMP                 | 6  | P29 | S | S | 48 | 5  | 20 | 5 | 110 | 44  | e |
| 514 | Yld(%) | 91  | S24 | Pd <sub>2</sub> (dba) <sub>3</sub> | L01B | PMP                 | 6  | P29 | S | S | 48 | 5  | 20 | 5 | 110 | 44  | e |
| 515 | Yld(%) | 93  | S24 | Pd <sub>2</sub> (dba) <sub>3</sub> | L15B | PMP                 | 6  | P29 | S | S | 48 | 5  | 20 | 5 | 110 | 44  | e |
| 516 | Yld(%) | 54  | S24 | Pd <sub>2</sub> (dba) <sub>3</sub> | L19B | PMP                 | 6  | P29 | S | S | 48 | 5  | 20 | 5 | 110 | 44  | e |
| 517 | Yld(%) | 76  | S24 | Pd <sub>2</sub> (dba) <sub>3</sub> | L16B | PMP                 | 6  | P29 | S | S | 48 | 5  | 20 | 5 | 110 | 44  | e |
| 518 | Yld(%) | 59  | S24 | Pd <sub>2</sub> (dba) <sub>3</sub> | L17B | PMP                 | 6  | P29 | S | S | 48 | 5  | 20 | 5 | 110 | 44  | e |
| 519 | Yld(%) | 18  | S24 | Pd <sub>2</sub> (dba) <sub>3</sub> | L18B | PMP                 | 6  | P29 | S | S | 48 | 5  | 20 | 5 | 110 | 44  | e |
| 520 | Yld(%) | 8   | S01 | Pd <sub>2</sub> (dba) <sub>3</sub> | L01B | Cy <sub>2</sub> NMe | 1  | P01 | S | S | 36 | 10 | 28 | 2 | 80  | 72  | a |
| 521 | Yld(%) | 55  | S24 | Pd <sub>2</sub> (dba) <sub>3</sub> | L03B | PMP                 | 3  | P29 | S | S | 48 | 5  | 20 | 5 | 110 | 1,5 | e |
| 522 | Yld(%) | 80  | S24 | Pd <sub>2</sub> (dba) <sub>3</sub> | L14A | PMP                 | 3  | P29 | R | S | 59 | 5  | 20 | 5 | 110 | 1,5 | e |
| 523 | Yld(%) | 35  | S24 | Pd <sub>2</sub> (dba) <sub>3</sub> | L02B | PMP                 | 3  | P29 | S | S | 48 | 5  | 20 | 5 | 110 | 1,5 | e |
| 524 | Yld(%) | 35  | S24 | Pd <sub>2</sub> (dba) <sub>3</sub> | L01B | PMP                 | 3  | P29 | S | S | 48 | 5  | 20 | 5 | 110 | 1,5 | e |
| 525 | Yld(%) | 56  | S24 | Pd <sub>2</sub> (dba) <sub>3</sub> | L15B | PMP                 | 3  | P29 | S | S | 48 | 5  | 20 | 5 | 110 | 1,5 | e |
| 526 | Yld(%) | 56  | S24 | Pd <sub>2</sub> (dba) <sub>3</sub> | L19B | PMP                 | 3  | P29 | S | S | 48 | 5  | 20 | 5 | 110 | 1,5 | e |
| 527 | Yld(%) | 6   | S24 | Pd <sub>2</sub> (dba) <sub>3</sub> | L16B | PMP                 | 3  | P29 | S | S | 48 | 5  | 20 | 5 | 110 | 1,5 | e |
| 528 | Yld(%) | 19  | S24 | Pd <sub>2</sub> (dba) <sub>3</sub> | L17B | PMP                 | 3  | P29 | S | S | 48 | 5  | 20 | 5 | 110 | 1,5 | e |
| 529 | Yld(%) | 18  | S24 | Pd <sub>2</sub> (dba) <sub>3</sub> | L18B | PMP                 | 3  | P29 | S | S | 48 | 5  | 20 | 5 | 110 | 1,5 | e |
| 530 | Yld(%) | 0   | S01 | Pd <sub>2</sub> (dba) <sub>3</sub> | L01B | Et <sub>3</sub> N   | 1  | P01 | S | S | 36 | 10 | 28 | 2 | 80  | 72  | a |
| 531 | Yld(%) | 0   | S24 | Pd <sub>2</sub> (dba) <sub>3</sub> | L01B | PMP                 | 9  | P29 | S | S | 48 | 5  | 20 | 5 | 110 | 1,5 | e |

|     |        |     |     |                                    |      |                     |    |     |   |   |    |    |    |   |     |     |   |
|-----|--------|-----|-----|------------------------------------|------|---------------------|----|-----|---|---|----|----|----|---|-----|-----|---|
| 532 | Yld(%) | 9   | S24 | Pd <sub>2</sub> (dba) <sub>3</sub> | L01B | PMP                 | 10 | P29 | S | S | 48 | 5  | 20 | 5 | 110 | 1,5 | e |
| 533 | Yld(%) | 24  | S24 | Pd <sub>2</sub> (dba) <sub>3</sub> | L01B | PMP                 | 1  | P29 | S | S | 48 | 5  | 20 | 5 | 110 | 1,5 | e |
| 534 | Yld(%) | 71  | S24 | Pd <sub>2</sub> (dba) <sub>3</sub> | L01B | PMP                 | 6  | P29 | S | S | 48 | 5  | 20 | 5 | 110 | 1,5 | e |
| 535 | Yld(%) | 46  | S24 | Pd <sub>2</sub> (dba) <sub>3</sub> | L01B | PMP                 | 3  | P29 | S | S | 48 | 5  | 20 | 5 | 110 | 1,5 | e |
| 536 | Yld(%) | 57  | S24 | Pd <sub>2</sub> (dba) <sub>3</sub> | L01B | PMP                 | 11 | P29 | S | S | 48 | 5  | 20 | 5 | 110 | 1,5 | e |
| 537 | Yld(%) | 96  | S24 | Pd <sub>2</sub> (dba) <sub>3</sub> | L03B | PMP                 | 6  | P29 | S | S | 48 | 5  | 20 | 5 | 110 | 44  | e |
| 538 | Yld(%) | 50  | S24 | Pd <sub>2</sub> (dba) <sub>3</sub> | L02B | PMP                 | 6  | P29 | S | S | 48 | 5  | 20 | 5 | 110 | 44  | e |
| 539 | Yld(%) | 87  | S24 | Pd <sub>2</sub> (dba) <sub>3</sub> | L01B | PMP                 | 6  | P29 | S | S | 48 | 5  | 20 | 5 | 110 | 44  | e |
| 540 | Yld(%) | 91  | S24 | Pd <sub>2</sub> (dba) <sub>3</sub> | L15B | PMP                 | 6  | P29 | S | S | 48 | 5  | 20 | 5 | 110 | 44  | e |
| 541 | Yld(%) | 33  | S01 | Pd(dba) <sub>2</sub>               | L01B | Et <sub>3</sub> N   | 2  | P01 | S | S | 36 | 10 | 28 | 2 | 80  | 72  | a |
| 542 | Yld(%) | 58  | S24 | Pd <sub>2</sub> (dba) <sub>3</sub> | L16B | PMP                 | 6  | P29 | S | S | 48 | 5  | 20 | 5 | 110 | 44  | e |
| 543 | Yld(%) | 58  | S24 | Pd <sub>2</sub> (dba) <sub>3</sub> | L17B | PMP                 | 6  | P29 | S | S | 48 | 5  | 20 | 5 | 110 | 44  | e |
| 544 | Yld(%) | 96  | S24 | Pd <sub>2</sub> (dba) <sub>3</sub> | L03B | PMP                 | 6  | P29 | S | S | 48 | 5  | 20 | 5 | 110 | 44  | e |
| 545 | Yld(%) | 39  | S24 | Pd <sub>2</sub> (dba) <sub>3</sub> | L02B | PMP                 | 6  | P29 | S | S | 48 | 5  | 20 | 5 | 110 | 44  | e |
| 546 | Yld(%) | 54  | S24 | Pd <sub>2</sub> (dba) <sub>3</sub> | L01B | PMP                 | 6  | P29 | S | S | 48 | 5  | 20 | 5 | 110 | 44  | e |
| 547 | Yld(%) | 70  | S24 | Pd <sub>2</sub> (dba) <sub>3</sub> | L15B | PMP                 | 6  | P29 | S | S | 48 | 5  | 20 | 5 | 110 | 44  | e |
| 548 | Yld(%) | 16  | S24 | Pd <sub>2</sub> (dba) <sub>3</sub> | L16B | PMP                 | 6  | P29 | S | S | 48 | 5  | 20 | 5 | 110 | 44  | e |
| 549 | Yld(%) | 3   | S24 | Pd <sub>2</sub> (dba) <sub>3</sub> | L17B | PMP                 | 6  | P29 | S | S | 48 | 5  | 20 | 5 | 110 | 44  | e |
| 550 | Yld(%) | 45  | S24 | Pd <sub>2</sub> (dba) <sub>3</sub> | L03B | PMP                 | 3  | P29 | S | S | 48 | 5  | 20 | 5 | 110 | 1,5 | e |
| 551 | Yld(%) | 31  | S24 | Pd <sub>2</sub> (dba) <sub>3</sub> | L02B | PMP                 | 3  | P29 | S | S | 48 | 5  | 20 | 5 | 110 | 1,5 | e |
| 552 | Yld(%) | 70  | S01 | Pd(OAc) <sub>2</sub>               | L01B | PMP                 | 2  | P01 | S | S | 36 | 10 | 28 | 2 | 80  | 24  | a |
| 553 | Yld(%) | 52  | S24 | Pd <sub>2</sub> (dba) <sub>3</sub> | L01B | PMP                 | 3  | P29 | S | S | 48 | 5  | 20 | 5 | 110 | 1,5 | e |
| 554 | Yld(%) | 63  | S24 | Pd <sub>2</sub> (dba) <sub>3</sub> | L15B | PMP                 | 3  | P29 | S | S | 48 | 5  | 20 | 5 | 110 | 1,5 | e |
| 555 | Yld(%) | 3   | S24 | Pd <sub>2</sub> (dba) <sub>3</sub> | L16B | PMP                 | 3  | P29 | S | S | 48 | 5  | 20 | 5 | 110 | 1,5 | e |
| 556 | Yld(%) | 9   | S24 | Pd <sub>2</sub> (dba) <sub>3</sub> | L17B | PMP                 | 3  | P29 | R | S | 59 | 5  | 20 | 5 | 110 | 1,5 | e |
| 557 | Yld(%) | 51  | S24 | Pd <sub>2</sub> (dba) <sub>3</sub> | L03B | PMP                 | 3  | P29 | S | S | 48 | 5  | 20 | 5 | 110 | 1,5 | e |
| 558 | Yld(%) | 16  | S24 | Pd <sub>2</sub> (dba) <sub>3</sub> | L02B | PMP                 | 3  | P29 | S | S | 48 | 5  | 20 | 5 | 110 | 1,5 | e |
| 559 | Yld(%) | 33  | S24 | Pd <sub>2</sub> (dba) <sub>3</sub> | L01B | PMP                 | 3  | P29 | S | S | 48 | 5  | 20 | 5 | 110 | 1,5 | e |
| 560 | Yld(%) | 47  | S24 | Pd <sub>2</sub> (dba) <sub>3</sub> | L15B | PMP                 | 3  | P29 | S | S | 48 | 5  | 20 | 5 | 110 | 1,5 | e |
| 561 | Yld(%) | 0,4 | S24 | Pd <sub>2</sub> (dba) <sub>3</sub> | L16B | PMP                 | 3  | P29 | S | S | 48 | 5  | 20 | 5 | 110 | 1,5 | e |
| 562 | Yld(%) | 4   | S24 | Pd <sub>2</sub> (dba) <sub>3</sub> | L17B | PMP                 | 3  | P29 | S | S | 48 | 5  | 20 | 5 | 110 | 1,5 | e |
| 563 | Yld(%) | 72  | S01 | Pd(OAc) <sub>2</sub>               | L01B | PMP                 | 2  | P01 | S | S | 36 | 10 | 28 | 2 | 80  | 24  | a |
| 564 | Yld(%) | 82  | S01 | Pd(dba) <sub>2</sub>               | L01B | PMP                 | 2  | P01 | S | S | 48 | 10 | 28 | 2 | 80  | 24  | a |
| 565 | Yld(%) | 66  | S01 | Pd <sub>2</sub> (dba) <sub>3</sub> | L01B | PMP                 | 3  | P01 | S | S | 48 | 10 | 28 | 2 | 80  | 24  | a |
| 566 | Yld(%) | 11  | S01 | Pd(OAc) <sub>2</sub>               | L01B | PMP                 | 3  | P01 | S | S | 36 | 10 | 28 | 2 | 80  | 48  | a |
| 567 | Yld(%) | 10  | S01 | Pd(OAc) <sub>2</sub>               | L01B | PMP                 | 2  | P01 | S | S | 36 | 10 | 28 | 2 | 40  | 72  | a |
| 568 | Yld(%) | 65  | S01 | Pd(OAc) <sub>2</sub>               | L01B | Cy <sub>2</sub> NMe | 2  | P01 | S | S | 36 | 10 | 28 | 2 | 80  | 30  | a |
| 569 | Yld(%) | 76  | S01 | Pd(OAc) <sub>2</sub>               | L01B | PMP                 | 2  | P01 | S | S | 36 | 10 | 28 | 1 | 80  | 48  | a |
| 570 | Yld(%) | 43  | S01 | Pd(OAc) <sub>2</sub>               | L01B | PMP                 | 2  | P01 | S | S | 36 | 10 | 28 | 3 | 80  | 48  | a |
| 571 | Yld(%) | 46  | S01 | Pd(OAc) <sub>2</sub>               | L01B | PMP                 | 2  | P01 | S | S | 36 | 10 | 28 | 2 | 80  | 24  | a |
| 572 | Yld(%) | 13  | S01 | Pd(OAc) <sub>2</sub>               | L01B | Et <sub>3</sub> N   | 4  | P01 | S | S | 36 | 10 | 28 | 2 | 80  | 72  | a |
| 573 | Yld(%) | 19  | S01 | Pd(OAc) <sub>2</sub>               | L01B | Et <sub>3</sub> N   | 5  | P01 | S | S | 36 | 10 | 28 | 2 | 80  | 72  | a |
| 574 | Yld(%) | 75  | S01 | Pd(OAc) <sub>2</sub>               | L01B | PMP                 | 2  | P01 | S | S | 36 | 10 | 28 | 2 | 80  | 31  | a |
| 575 | Yld(%) | 5   | S01 | Pd(OAc) <sub>2</sub>               | L01B | PMP                 | 6  | P01 | S | S | 36 | 10 | 28 | 2 | 80  | 24  | a |
| 576 | Yld(%) | 33  | S01 | Pd(OAc) <sub>2</sub>               | L01B | PMP                 | 3  | P01 | S | S | 36 | 10 | 28 | 2 | 80  | 24  | a |
| 577 | Yld(%) | 54  | S01 | Pd(OAc) <sub>2</sub>               | L03B | PMP                 | 2  | P01 | S | S | 36 | 10 | 28 | 2 | 80  | 31  | a |
| 578 | Yld(%) | 70  | S01 | Pd(OAc) <sub>2</sub>               | L04B | PMP                 | 2  | P01 | S | S | 36 | 10 | 28 | 2 | 80  | 24  | a |

|     |        |    |     |                                    |      |                     |   |     |    |   |    |     |    |   |     |    |   |
|-----|--------|----|-----|------------------------------------|------|---------------------|---|-----|----|---|----|-----|----|---|-----|----|---|
| 579 | Yld(%) | 18 | S01 | Pd(OAc) <sub>2</sub>               | L05B | PMP                 | 2 | P01 | SS | S | 37 | 10  | 28 | 2 | 80  | 31 | a |
| 580 | Yld(%) | 73 | S01 | Pd(OAc) <sub>2</sub>               | L06B | PMP                 | 1 | P01 | SS | S | 37 | 10  | 28 | 2 | 80  | 48 | a |
| 581 | Yld(%) | 59 | S01 | Pd(OAc) <sub>2</sub>               | L06B | Et <sub>3</sub> N   | 1 | P01 | SS | S | 37 | 10  | 28 | 2 | 40  | 72 | a |
| 582 | Yld(%) | 44 | S01 | Pd(OAc) <sub>2</sub>               | L06B | Et <sub>3</sub> N   | 2 | P01 | SS | S | 37 | 10  | 28 | 2 | 80  | 24 | a |
| 583 | Yld(%) | 69 | S01 | Pd(OAc) <sub>2</sub>               | L06B | Et <sub>3</sub> N   | 4 | P01 | SS | S | 37 | 10  | 28 | 2 | 80  | 72 | a |
| 584 | Yld(%) | 43 | S01 | Pd(OAc) <sub>2</sub>               | L06B | Et <sub>3</sub> N   | 4 | P01 | SS | S | 37 | 10  | 28 | 2 | 80  | 72 | a |
| 585 | Yld(%) | 24 | S01 | Pd(OAc) <sub>2</sub>               | L06B | PMP                 | 4 | P01 | SS | S | 37 | 10  | 28 | 2 | 40  | 72 | a |
| 586 | Yld(%) | 18 | S01 | Pd(OAc) <sub>2</sub>               | L06B | Et <sub>3</sub> N   | 5 | P01 | SS | S | 37 | 10  | 28 | 2 | 80  | 72 | a |
| 587 | Yld(%) | 8  | S01 | Pd(OAc) <sub>2</sub>               | L06B | Et <sub>3</sub> N   | 5 | P01 | SS | S | 37 | 10  | 20 | 3 | 80  | 72 | a |
| 588 | Yld(%) | 75 | S01 | Pd(OAc) <sub>2</sub>               | L06B | Cy <sub>2</sub> NMe | 1 | P01 | SS | S | 37 | 10  | 20 | 3 | 80  | 48 | a |
| 589 | Yld(%) | 34 | S01 | Pd(OAc) <sub>2</sub>               | L06B | Cy <sub>2</sub> NMe | 1 | P01 | SS | S | 37 | 10  | 20 | 2 | 80  | 9  | a |
| 590 | Yld(%) | 8  | S01 | Pd(OAc) <sub>2</sub>               | L06B | Cy <sub>2</sub> NMe | 2 | P01 | SS | S | 37 | 10  | 20 | 2 | 80  | 24 | a |
| 591 | Yld(%) | 9  | S01 | Pd(OAc) <sub>2</sub>               | L07B | Et <sub>3</sub> N   | 1 | P01 | SS | S | 37 | 10  | 28 | 2 | 80  | 72 | a |
| 592 | Yld(%) | 4  | S01 | Pd(OAc) <sub>2</sub>               | L01B | Et <sub>3</sub> N   | 1 | P01 | S  | S | 48 | 5   | 14 | 2 | 80  | 72 | a |
| 593 | Yld(%) | 66 | S12 | Pd(OAc) <sub>2</sub>               | L01B | PMP                 | 2 | P12 | S  | S | 36 | 10  | 28 | 2 | 80  | 48 | a |
| 594 | Yld(%) | 51 | S12 | Pd(OAc) <sub>2</sub>               | L01A | PMP                 | 2 | P12 | R  | R | 51 | 10  | 28 | 2 | 80  | 48 | a |
| 595 | Yld(%) | 54 | S12 | Pd(OAc) <sub>2</sub>               | L01B | PMP                 | 2 | P12 | S  | S | 36 | 10  | 14 | 2 | 80  | 48 | a |
| 596 | Yld(%) | 58 | S02 | Pd(OAc) <sub>2</sub>               | L01B | PMP                 | 2 | P02 | S  | S | 36 | 10  | 28 | 2 | 80  | 48 | a |
| 597 | Yld(%) | 38 | S03 | Pd(OAc) <sub>2</sub>               | L01B | PMP                 | 2 | P03 | S  | S | 36 | 10  | 28 | 2 | 80  | 48 | a |
| 598 | Yld(%) | 60 | S04 | Pd(OAc) <sub>2</sub>               | L01B | PMP                 | 2 | P04 | S  | S | 36 | 10  | 28 | 2 | 80  | 48 | a |
| 599 | Yld(%) | 60 | S05 | Pd(OAc) <sub>2</sub>               | L01B | PMP                 | 2 | P05 | S  | S | 36 | 10  | 28 | 2 | 80  | 48 | a |
| 600 | Yld(%) | 55 | S06 | Pd(OAc) <sub>2</sub>               | L01B | PMP                 | 2 | P06 | S  | S | 36 | 10  | 28 | 2 | 80  | 48 | a |
| 601 | Yld(%) | 51 | S07 | Pd(OAc) <sub>2</sub>               | L01B | PMP                 | 2 | P07 | S  | S | 36 | 10  | 28 | 2 | 80  | 48 | a |
| 602 | Yld(%) | 13 | S08 | Pd(OAc) <sub>2</sub>               | L01B | PMP                 | 2 | P08 | S  | S | 36 | 10  | 28 | 2 | 80  | 48 | a |
| 603 | Yld(%) | 66 | S09 | Pd(OAc) <sub>2</sub>               | L01B | PMP                 | 2 | P09 | S  | S | 36 | 10  | 28 | 2 | 80  | 48 | a |
| 604 | Yld(%) | 46 | S10 | Pd(OAc) <sub>2</sub>               | L01B | PMP                 | 2 | P10 | S  | S | 36 | 10  | 28 | 2 | 80  | 48 | a |
| 605 | Yld(%) | 54 | S11 | Pd(OAc) <sub>2</sub>               | L01B | PMP                 | 2 | P11 | S  | S | 36 | 10  | 28 | 2 | 80  | 48 | a |
| 606 | Yld(%) | 68 | S12 | Pd(OAc) <sub>2</sub>               | L01B | PMP                 | 2 | P12 | S  | S | 36 | 10  | 28 | 2 | 80  | 48 | a |
| 607 | Yld(%) | 10 | S13 | Pd(OAc) <sub>2</sub>               | L01B | PMP                 | 2 | P13 | S  | S | 36 | 10  | 28 | 2 | 80  | 48 | a |
| 608 | Yld(%) | 49 | S14 | Pd(OAc) <sub>2</sub>               | L01B | PMP                 | 2 | P14 | S  | S | 36 | 10  | 28 | 2 | 80  | 48 | a |
| 609 | Yld(%) | 0  | S15 | Pd(OAc) <sub>2</sub>               | L01B | PMP                 | 2 | P15 | S  | S | 36 | 10  | 28 | 2 | 80  | 48 | a |
| 610 | Yld(%) | 11 | S16 | Pd(OAc) <sub>2</sub>               | L01B | PMP                 | 2 | P16 | S  | S | 36 | 10  | 28 | 2 | 80  | 48 | a |
| 611 | Yld(%) | 45 | S17 | Pd(OAc) <sub>2</sub>               | L01B | PMP                 | 2 | P17 | S  | S | 36 | 10  | 28 | 2 | 80  | 48 | a |
| 612 | Yld(%) | 0  | S18 | Pd(OAc) <sub>2</sub>               | L01B | PMP                 | 2 | P18 | S  | S | 36 | 10  | 28 | 2 | 80  | 48 | a |
| 613 | Yld(%) | 0  | S19 | Pd(OAc) <sub>2</sub>               | L01B | PMP                 | 2 | P19 | S  | S | 36 | 10  | 28 | 2 | 80  | 48 | a |
| 614 | Yld(%) | 0  | S20 | Pd(OAc) <sub>2</sub>               | L01B | PMP                 | 2 | P20 | S  | S | 36 | 10  | 28 | 2 | 80  | 48 | a |
| 615 | Yld(%) | 5  | S01 | Pd(OAc) <sub>2</sub>               | L01B | Et <sub>3</sub> N   | 1 | P01 | S  | S | 36 | 5   | 14 | 2 | 80  | 72 | a |
| 616 | Yld(%) | 82 | S21 | Pd <sub>2</sub> (dba) <sub>3</sub> | L01A | PMP                 | 6 | P21 | R  | R | 71 | 2,5 | 10 | 8 | 110 | 12 | b |
| 618 | Yld(%) | 78 | S23 | Pd <sub>2</sub> (dba) <sub>3</sub> | L01B | PMP                 | 6 | P30 | S  | S | 48 | 5   | 10 | 5 | 110 | 48 | c |
| 619 | Yld(%) | 17 | S01 | Pd(OAc) <sub>2</sub>               | L01B | Et <sub>3</sub> N   | 1 | P01 | S  | S | 36 | 10  | 28 | 2 | 80  | 72 | a |
| 620 | Yld(%) | 7  | S25 | Pd <sub>2</sub> (dba) <sub>3</sub> | L01B | PMP                 | 6 | P31 | S  | S | 48 | 5   | 10 | 5 | 110 | 72 | c |
| 621 | Yld(%) | 71 | S26 | Pd <sub>2</sub> (dba) <sub>3</sub> | L01B | PMP                 | 6 | P27 | S  | S | 48 | 5   | 10 | 5 | 110 | 72 | c |
| 622 | Yld(%) | 68 | S27 | Pd <sub>2</sub> (dba) <sub>3</sub> | L01B | PMP                 | 6 | P28 | S  | S | 48 | 5   | 10 | 5 | 110 | 72 | c |
| 623 | Yld(%) | 63 | S24 | Pd <sub>2</sub> (dba) <sub>3</sub> | L01B | PMP                 | 6 | P29 | S  | S | 48 | 5   | 10 | 5 | 110 | 48 | c |
| 624 | Yld(%) | 60 | S24 | Pd <sub>2</sub> (dba) <sub>3</sub> | L01B | PMP                 | 6 | P29 | S  | S | 48 | 5   | 10 | 5 | 60  | 48 | c |
| 625 | Yld(%) | 54 | S24 | Pd <sub>2</sub> (dba) <sub>3</sub> | L01B | PMP                 | 6 | P29 | S  | S | 48 | 5   | 10 | 5 | 60  | 48 | c |

|     |        |    |     |                                    |      |                                |   |     |    |   |    |    |    |   |     |    |   |
|-----|--------|----|-----|------------------------------------|------|--------------------------------|---|-----|----|---|----|----|----|---|-----|----|---|
| 626 | Yld(%) | 74 | S24 | Pd <sub>2</sub> (dba) <sub>3</sub> | L01B | K <sub>2</sub> CO <sub>3</sub> | 6 | P29 | S  | S | 48 | 5  | 10 | 5 | 110 | 72 | c |
| 627 | Yld(%) | 61 | S23 | Pd <sub>2</sub> (dba) <sub>3</sub> | L05B | PMP                            | 6 | P24 | SS | R | 64 | 5  | 10 | 5 | 110 | 72 | c |
| 628 | Yld(%) | 66 | S25 | Pd <sub>2</sub> (dba) <sub>3</sub> | L05B | PMP                            | 6 | P26 | SS | R | 64 | 5  | 10 | 5 | 110 | 96 | c |
| 629 | Yld(%) | 7  | S01 | Pd(OAc) <sub>2</sub>               | L01B | PMP                            | 1 | P01 | S  | S | 36 | 10 | 28 | 2 | 80  | 72 | a |
| 630 | Yld(%) | 0  | S25 | Pd <sub>2</sub> (dba) <sub>3</sub> | L01B | K <sub>2</sub> CO <sub>3</sub> | 6 | P31 | S  | S | 48 | 5  | 10 | 5 | 110 | 96 | c |
| 631 | Yld(%) | 88 | S24 | Pd <sub>2</sub> (dba) <sub>3</sub> | L01A | PMP                            | 6 | P25 | R  | R | 71 | 5  | 20 | 5 | 110 | 48 | d |
| 632 | Yld(%) | 0  | S24 | Pd <sub>2</sub> (dba) <sub>3</sub> | L08A | PMP                            | 6 | P29 | R  | S | 59 | 5  | 20 | 5 | 110 | 48 | d |
| 633 | Yld(%) | 93 | S24 | Pd <sub>2</sub> (dba) <sub>3</sub> | L09A | PMP                            | 6 | P29 | R  | S | 59 | 5  | 20 | 5 | 110 | 48 | d |
| 634 | Yld(%) | 84 | S24 | Pd <sub>2</sub> (dba) <sub>3</sub> | L10A | PMP                            | 6 | P29 | R  | S | 59 | 5  | 20 | 5 | 110 | 48 | d |
| 635 | Yld(%) | 73 | S24 | Pd <sub>2</sub> (dba) <sub>3</sub> | L11A | PMP                            | 6 | P29 | R  | S | 59 | 5  | 20 | 5 | 110 | 48 | d |
| 636 | Yld(%) | 42 | S24 | Pd <sub>2</sub> (dba) <sub>3</sub> | L03B | PMP                            | 6 | P29 | S  | S | 48 | 5  | 20 | 5 | 110 | 48 | d |
| 637 | Yld(%) | 90 | S24 | Pd <sub>2</sub> (dba) <sub>3</sub> | L12B | PMP                            | 6 | P25 | S  | R | 89 | 5  | 20 | 5 | 110 | 48 | d |
| 638 | Yld(%) | 77 | S24 | Pd <sub>2</sub> (dba) <sub>3</sub> | L12A | PMP                            | 6 | P29 | R  | S | 59 | 5  | 20 | 5 | 110 | 48 | d |
| 639 | Yld(%) | 88 | S24 | Pd <sub>2</sub> (dba) <sub>3</sub> | L13B | PMP                            | 6 | P25 | S  | R | 89 | 5  | 20 | 5 | 110 | 44 | d |
| 640 | Yld(%) | 3  | S01 | Pd(OAc) <sub>2</sub>               | L01B | Et <sub>3</sub> N              | 1 | P01 | S  | S | 36 | 10 | 28 | 2 | 110 | 72 | a |

## 2. Dataset: Input variables and model results

**TableS 2.** Input variables and model results

| n  | p     | $P_{\epsilon_{ij}}(\%)$ |      |       | $Y_1V_1$<br>(Sub.) | $Y_2V_2$<br>(Sub.) | $Y_5V_5$<br>(lig.) | $Y_4V_4$<br>(base) | $Y_3V_3$<br>(prod.) | $Y_6V_6$<br>(solv.) |
|----|-------|-------------------------|------|-------|--------------------|--------------------|--------------------|--------------------|---------------------|---------------------|
|    |       | obs                     | pred | res   |                    |                    |                    |                    |                     |                     |
| 1  | ee(%) | 56                      | 26.4 | 29.6  | -37.2              | 1078.1             | 87696.6            | 44.4               | 170.6               | 1014194.0           |
| 2  | ee(%) | 63                      | 31.6 | 31.4  | -37.2              | 1078.1             | 350786.3           | 44.4               | 170.6               | 1014194.0           |
| 3  | ee(%) | 0                       | 37.3 | -37.3 | -37.2              | 1078.1             | 350786.3           | 221.4              | 170.6               | 1014194.0           |
| 4  | ee(%) | 29                      | 25.1 | 3.9   | -37.2              | 1078.1             | 350786.3           | 44.4               | 170.6               | 1394516.8           |
| 5  | ee(%) | 30                      | 42.2 | -12.2 | -37.2              | 1078.1             | 350786.3           | 372.2              | 170.6               | 1014194.0           |
| 6  | ee(%) | 0                       | 31.6 | -31.6 | -37.2              | 1078.1             | 350786.3           | 44.4               | 170.6               | 1014194.0           |
| 7  | ee(%) | 67                      | 31.1 | 35.9  | -37.2              | 1078.1             | 350786.3           | 44.4               | 170.6               | 1042071.1           |
| 8  | ee(%) | 65                      | 48.8 | 16.2  | -37.2              | 1078.1             | 350786.3           | 221.4              | 170.6               | 347357.0            |
| 9  | ee(%) | 66                      | 48.8 | 17.2  | -37.2              | 1078.1             | 350786.3           | 221.4              | 170.6               | 347357.0            |
| 10 | ee(%) | 66                      | 74.0 | -8.0  | -56.4              | 1633.7             | 531567.1           | 335.5              | 258.5               | 526370.4            |
| 11 | ee(%) | 70                      | 79.1 | -9.1  | -56.4              | 1633.7             | 531567.1           | 335.5              | 258.5               | 226641.0            |
| 12 | ee(%) | 68                      | 49.6 | 18.4  | -37.2              | 1078.1             | 350786.3           | 221.4              | 170.6               | 299125.3            |
| 13 | ee(%) | 0                       | 45.8 | -45.8 | -37.2              | 1078.1             | 350786.3           | 221.4              | 170.6               | 521035.5            |
| 14 | ee(%) | 63                      | 52.2 | 10.8  | -37.2              | 1078.1             | 350786.3           | 372.2              | 170.6               | 434196.3            |
| 15 | ee(%) | 63                      | 39.2 | 23.8  | -37.2              | 1078.1             | 350786.3           | 110.7              | 170.6               | 694714.0            |
| 16 | ee(%) | 63                      | 46.4 | 16.6  | -37.2              | 1078.1             | 350786.3           | 332.1              | 170.6               | 694714.0            |
| 17 | ee(%) | 58                      | 48.8 | 9.2   | -37.2              | 1078.1             | 350786.3           | 221.4              | 170.6               | 347357.0            |
| 18 | ee(%) | 0                       | 41.0 | -41.0 | -37.2              | 1078.1             | 350786.3           | 44.4               | 170.6               | 464617.7            |
| 19 | ee(%) | 62                      | 39.6 | 22.4  | -37.2              | 1078.1             | 350786.3           | 44.4               | 170.6               | 546921.4            |
| 20 | ee(%) | 49                      | 47.0 | 2.0   | -37.2              | 1078.1             | 350786.3           | 221.4              | 170.6               | 448669.5            |
| 21 | ee(%) | 40                      | 54.2 | -14.2 | -37.2              | 1078.1             | 350786.3           | 221.4              | 170.6               | 33187.0             |
| 22 | ee(%) | 57                      | 52.2 | 4.8   | -37.2              | 1078.1             | 350786.3           | 221.4              | 170.6               | 149562.6            |
| 23 | ee(%) | 55                      | 47.0 | 8.0   | -37.2              | 1078.1             | 350786.3           | 221.4              | 170.6               | 448669.5            |
| 24 | ee(%) | 11                      | 53.5 | -42.5 | -37.2              | 1078.1             | 589032.0           | 221.4              | 170.6               | 347357.0            |
| 25 | ee(%) | 34                      | 43.5 | -9.5  | -34.4              | 996.8              | 324320.1           | 204.7              | 157.7               | 414818.2            |
| 26 | ee(%) | 41                      | 46.2 | -5.2  | -34.4              | 996.8              | 641361.5           | 204.7              | 157.7               | 625116.6            |
| 27 | ee(%) | 53                      | 43.6 | 9.4   | -34.4              | 996.8              | 641361.5           | 41.1               | 157.7               | 468837.4            |
| 28 | ee(%) | 28                      | 46.1 | -18.1 | -34.4              | 996.8              | 641361.5           | 41.1               | 157.7               | 321149.5            |
| 29 | ee(%) | 57                      | 44.2 | 12.8  | -34.4              | 996.8              | 641361.5           | 41.1               | 157.7               | 429563.1            |
| 30 | ee(%) | 55                      | 44.2 | 10.8  | -34.4              | 996.8              | 641361.5           | 41.1               | 157.7               | 429563.1            |
| 31 | ee(%) | 46                      | 53.2 | -7.2  | -34.4              | 996.8              | 641361.5           | 204.7              | 157.7               | 214781.5            |
| 32 | ee(%) | 56                      | 42.9 | 13.1  | -34.4              | 996.8              | 641361.5           | 41.1               | 157.7               | 505657.1            |
| 33 | ee(%) | 54                      | 43.8 | 10.2  | -34.4              | 996.8              | 458115.4           | 61.6               | 157.7               | 282284.3            |
| 34 | ee(%) | 30                      | 52.7 | -22.7 | -34.4              | 996.8              | 458115.4           | 516.1              | 157.7               | 625116.6            |
| 35 | ee(%) | 37                      | 55.8 | -18.8 | -34.4              | 996.8              | 458115.4           | 344.1              | 157.7               | 117209.4            |
| 36 | ee(%) | 53                      | 52.3 | 0.7   | -34.4              | 996.8              | 458115.4           | 344.1              | 157.7               | 321149.5            |
| 37 | ee(%) | 10                      | 31.1 | -21.1 | -34.4              | 996.8              | 419778.6           | 41.1               | 157.7               | 937674.8            |
| 38 | ee(%) | 50                      | 40.0 | 10.0  | -56.4              | 1633.7             | 132891.8           | 67.3               | 258.5               | 1536867.6           |
| 39 | ee(%) | 71                      | 56.6 | 14.4  | -38.0              | 1503.6             | 350786.3           | 221.4              | 242.8               | 694714.0            |

|    |       |     |       |       |       |         |           |         |        |            |
|----|-------|-----|-------|-------|-------|---------|-----------|---------|--------|------------|
| 40 | ee(%) | -69 | -84.7 | 15.7  | 56.9  | -2250.8 | -525117.6 | -331.5  | -363.5 | -1039968.0 |
| 41 | ee(%) | 61  | 53.1  | 7.9   | -38.0 | 1503.6  | 175393.2  | 221.4   | 242.8  | 694714.0   |
| 42 | ee(%) | 63  | 42.2  | 20.8  | -36.7 | 1078.1  | 350786.3  | 221.4   | 161.4  | 694714.0   |
| 43 | ee(%) | 72  | 44.3  | 27.7  | -40.2 | 227.2   | 350786.3  | 221.4   | 172.1  | 694714.0   |
| 44 | ee(%) | 67  | 44.8  | 22.2  | -38.5 | 652.7   | 350786.3  | 221.4   | 171.3  | 694714.0   |
| 45 | ee(%) | 69  | 63.6  | 5.4   | -40.3 | 652.7   | 350786.3  | 221.4   | 244.3  | 694714.0   |
| 46 | ee(%) | 7   | 42.8  | -35.8 | -37.2 | 1078.1  | 350786.3  | 221.4   | 170.6  | 694714.0   |
| 47 | ee(%) | 63  | 42.8  | 20.2  | -37.2 | 1078.1  | 350786.3  | 221.4   | 170.6  | 694714.0   |
| 48 | ee(%) | 30  | 39.5  | -9.5  | -36.0 | 1503.6  | 350786.3  | 221.4   | 169.8  | 694714.0   |
| 49 | ee(%) | 71  | 60.6  | 10.4  | -39.1 | 1078.1  | 350786.3  | 221.4   | 243.6  | 694714.0   |
| 50 | ee(%) | 66  | 82.9  | -16.9 | -40.3 | 1078.1  | 350786.3  | 221.4   | 316.6  | 694714.0   |
| 51 | ee(%) | 61  | 32.2  | 28.8  | -35.4 | 3190.1  | 350786.3  | 221.4   | 245.3  | 694714.0   |
| 52 | ee(%) | 61  | 56.6  | 4.4   | -38.0 | 1503.6  | 350786.3  | 221.4   | 242.8  | 694714.0   |
| 53 | ee(%) | 28  | 29.6  | -1.6  | -34.6 | 2339.2  | 350786.3  | 221.4   | 173.8  | 694714.0   |
| 54 | ee(%) | 64  | 63.1  | 0.9   | -38.2 | 227.2   | 350786.3  | 221.4   | 181.6  | 694714.0   |
| 55 | ee(%) | 0   | 32.4  | -32.4 | -37.7 | 821.4   | 350786.3  | 221.4   | 138.8  | 694714.0   |
| 56 | ee(%) | 99  | 47.9  | 51.1  | -39.2 | 821.4   | 350786.3  | 221.4   | 200.4  | 694714.0   |
| 57 | ee(%) | 64  | 53.3  | 10.7  | -37.2 | 227.2   | 350786.3  | 221.4   | 142.7  | 694714.0   |
| 58 | ee(%) | 0   | 49.0  | -49.0 | -37.6 | 1078.1  | 350786.3  | 221.4   | 191.1  | 694714.0   |
| 59 | ee(%) | 0   | 4.7   | -4.7  | -36.0 | 1503.6  | 350786.3  | 221.4   | 88.5   | 694714.0   |
| 60 | ee(%) | 0   | 26.7  | -26.7 | -36.2 | 2014.3  | 350786.3  | 221.4   | 173.9  | 694714.0   |
| 61 | ee(%) | -68 | -61.1 | -6.9  | 45.9  | -6289.4 | -46432.5  | -1313.1 | -289.3 | -33825.0   |
| 62 | ee(%) | 90  | 72.5  | 17.5  | -46.0 | 5139.4  | 94922.7   | 838.9   | 265.8  | 138298.0   |
| 63 | ee(%) | 71  | 65.6  | 5.4   | -45.1 | 5139.4  | 94922.7   | 838.9   | 234.5  | 138298.0   |
| 65 | ee(%) | 96  | 72.5  | 23.5  | -46.0 | 5139.4  | 94922.7   | 838.9   | 268.5  | 207446.9   |
| 66 | ee(%) | 71  | 79.9  | -8.9  | -46.9 | 5139.4  | 94922.7   | 838.9   | 299.7  | 207446.9   |
| 67 | ee(%) | 16  | 65.6  | -49.6 | -45.1 | 5139.4  | 94922.7   | 838.9   | 234.5  | 138298.0   |
| 68 | ee(%) | 60  | 55.2  | 4.8   | -45.1 | 5139.4  | 94922.7   | 838.9   | 234.5  | 748317.7   |
| 69 | ee(%) | 7   | 55.2  | -48.2 | -45.1 | 5139.4  | 94922.7   | 838.9   | 234.5  | 748317.7   |
| 70 | ee(%) | 69  | 39.1  | 29.9  | -45.1 | 5139.4  | 94922.7   | 56.6    | 234.5  | 207446.9   |
| 71 | ee(%) | -24 | -51.5 | 27.5  | 33.3  | -3715.8 | -68629.5  | -606.5  | -192.2 | -149985.0  |
| 72 | ee(%) | -77 | -53.9 | -23.1 | 36.0  | -3715.8 | -68629.5  | -606.5  | -244.3 | -199980.0  |
| 73 | ee(%) | 0   | 49.2  | -49.2 | -49.7 | 5139.4  | 94922.7   | 56.6    | 337.9  | 276595.9   |
| 74 | ee(%) | -72 | -66.0 | -6.0  | 44.1  | -5028.0 | -185730.0 | -820.7  | -229.5 | -135300.0  |
| 75 | ee(%) | 0   | 41.6  | -41.6 | -26.8 | 3053.6  | 189406.0  | 498.4   | 139.4  | 82170.0    |
| 76 | ee(%) | 74  | 41.6  | 32.4  | -26.8 | 3053.6  | 189406.0  | 498.4   | 139.4  | 82170.0    |
| 77 | ee(%) | 46  | 41.6  | 4.4   | -26.8 | 3053.6  | 189406.0  | 498.4   | 139.4  | 82170.0    |
| 78 | ee(%) | 14  | 44.4  | -30.4 | -26.8 | 3053.6  | 331087.0  | 498.4   | 139.4  | 82170.0    |
| 79 | ee(%) | 28  | 67.5  | -39.5 | -45.1 | 5139.4  | 189845.4  | 838.9   | 234.5  | 138298.0   |
| 80 | ee(%) | -29 | -34.6 | 5.6   | 22.3  | -2538.5 | -157458.0 | -414.3  | -115.9 | -68310.0   |
| 81 | ee(%) | 47  | 41.6  | 5.4   | -26.8 | 3053.6  | 189406.0  | 498.4   | 139.4  | 82170.0    |
| 82 | ee(%) | -40 | -34.6 | -5.4  | 22.3  | -2538.5 | -157458.0 | -414.3  | -115.9 | -68310.0   |
| 83 | ee(%) | 28  | 67.7  | -39.7 | -45.1 | 5139.4  | 189845.4  | 838.9   | 234.5  | 126773.1   |
| 84 | ee(%) | -65 | -66.2 | 1.2   | 44.1  | -5028.0 | -185730.0 | -820.7  | -229.5 | -124025.0  |
| 85 | ee(%) | 85  | 72.8  | 12.2  | -45.1 | 5139.4  | 447722.2  | 838.9   | 234.5  | 126773.1   |
| 86 | ee(%) | 70  | 67.7  | 2.3   | -45.1 | 5139.4  | 189845.4  | 838.9   | 234.5  | 126773.1   |
| 87 | ee(%) | 71  | 72.8  | -1.8  | -45.1 | 5139.4  | 447722.2  | 838.9   | 234.5  | 126773.1   |

|     |       |     |       |       |       |         |           |        |        |           |
|-----|-------|-----|-------|-------|-------|---------|-----------|--------|--------|-----------|
| 88  | ee(%) | 81  | 70.3  | 10.7  | -45.1 | 5139.4  | 318783.8  | 838.9  | 234.5  | 126773.1  |
| 89  | ee(%) | 94  | 72.8  | 21.2  | -45.1 | 5139.4  | 447722.2  | 838.9  | 234.5  | 126773.1  |
| 90  | ee(%) | 74  | 76.4  | -2.4  | -45.1 | 5139.4  | 627788.9  | 838.9  | 234.5  | 126773.1  |
| 91  | ee(%) | 82  | 70.3  | 11.7  | -45.1 | 5139.4  | 318783.8  | 838.9  | 234.5  | 126773.1  |
| 92  | ee(%) | 62  | 69.6  | -7.6  | -45.1 | 5139.4  | 189845.4  | 838.9  | 234.5  | 19477.0   |
| 93  | ee(%) | 68  | 41.3  | 26.7  | -26.8 | 3053.6  | 112797.0  | 498.4  | 139.4  | 11572.3   |
| 94  | ee(%) | 90  | 74.7  | 15.3  | -45.1 | 5139.4  | 447722.2  | 838.9  | 234.5  | 19477.0   |
| 95  | ee(%) | 71  | 69.6  | 1.4   | -45.1 | 5139.4  | 189845.4  | 838.9  | 234.5  | 19477.0   |
| 96  | ee(%) | 81  | 74.7  | 6.3   | -45.1 | 5139.4  | 447722.2  | 838.9  | 234.5  | 19477.0   |
| 97  | ee(%) | 86  | 72.1  | 13.9  | -45.1 | 5139.4  | 318783.8  | 838.9  | 234.5  | 19477.0   |
| 98  | ee(%) | 97  | 74.7  | 22.3  | -45.1 | 5139.4  | 447722.2  | 838.9  | 234.5  | 19477.0   |
| 99  | ee(%) | 93  | 78.2  | 14.8  | -45.1 | 5139.4  | 627788.9  | 838.9  | 234.5  | 19477.0   |
| 100 | ee(%) | 84  | 72.1  | 11.9  | -45.1 | 5139.4  | 318783.8  | 838.9  | 234.5  | 19477.0   |
| 101 | ee(%) | 0   | 69.1  | -69.1 | -45.1 | 5139.4  | 189845.4  | 838.9  | 234.5  | 47136.6   |
| 102 | ee(%) | 72  | 69.1  | 2.9   | -45.1 | 5139.4  | 189845.4  | 838.9  | 234.5  | 46329.8   |
| 103 | ee(%) | 61  | 69.1  | -8.1  | -45.1 | 5139.4  | 189845.4  | 838.9  | 234.5  | 44024.9   |
| 104 | ee(%) | 70  | 69.8  | 0.2   | -45.1 | 5139.4  | 189845.4  | 838.9  | 234.5  | 4321.8    |
| 105 | ee(%) | 71  | 69.6  | 1.4   | -45.1 | 5139.4  | 189845.4  | 838.9  | 234.5  | 19477.0   |
| 106 | ee(%) | 68  | 69.6  | -1.6  | -45.1 | 5139.4  | 189845.4  | 838.9  | 234.5  | 18439.7   |
| 107 | ee(%) | 27  | 67.7  | -40.7 | -45.1 | 5139.4  | 189845.4  | 838.9  | 234.5  | 126773.1  |
| 108 | ee(%) | 85  | 72.8  | 12.2  | -45.1 | 5139.4  | 447722.2  | 838.9  | 234.5  | 126773.1  |
| 109 | ee(%) | 70  | 67.7  | 2.3   | -45.1 | 5139.4  | 189845.4  | 838.9  | 234.5  | 126773.1  |
| 110 | ee(%) | 71  | 72.8  | -1.8  | -45.1 | 5139.4  | 447722.2  | 838.9  | 234.5  | 126773.1  |
| 111 | ee(%) | 94  | 72.8  | 21.2  | -45.1 | 5139.4  | 447722.2  | 838.9  | 234.5  | 126773.1  |
| 112 | ee(%) | 74  | 76.4  | -2.4  | -45.1 | 5139.4  | 627788.9  | 838.9  | 234.5  | 126773.1  |
| 113 | ee(%) | 23  | 67.7  | -44.7 | -45.1 | 5139.4  | 189845.4  | 838.9  | 234.5  | 126773.1  |
| 114 | ee(%) | 78  | 72.8  | 5.2   | -45.1 | 5139.4  | 447722.2  | 838.9  | 234.5  | 126773.1  |
| 115 | ee(%) | 70  | 67.7  | 2.3   | -45.1 | 5139.4  | 189845.4  | 838.9  | 234.5  | 126773.1  |
| 116 | ee(%) | 65  | 72.8  | -7.8  | -45.1 | 5139.4  | 447722.2  | 838.9  | 234.5  | 126773.1  |
| 117 | ee(%) | 94  | 72.8  | 21.2  | -45.1 | 5139.4  | 447722.2  | 838.9  | 234.5  | 126773.1  |
| 118 | ee(%) | 83  | 76.4  | 6.6   | -45.1 | 5139.4  | 627788.9  | 838.9  | 234.5  | 126773.1  |
| 119 | ee(%) | 63  | 69.6  | -6.6  | -45.1 | 5139.4  | 189845.4  | 838.9  | 234.5  | 19477.0   |
| 120 | ee(%) | 92  | 74.7  | 17.3  | -45.1 | 5139.4  | 447722.2  | 838.9  | 234.5  | 19477.0   |
| 121 | ee(%) | 74  | 69.6  | 4.4   | -45.1 | 5139.4  | 189845.4  | 838.9  | 234.5  | 19477.0   |
| 122 | ee(%) | 85  | 74.7  | 10.3  | -45.1 | 5139.4  | 447722.2  | 838.9  | 234.5  | 19477.0   |
| 123 | ee(%) | 99  | 74.7  | 24.3  | -45.1 | 5139.4  | 447722.2  | 838.9  | 234.5  | 19477.0   |
| 124 | ee(%) | 95  | 78.2  | 16.8  | -45.1 | 5139.4  | 627788.9  | 838.9  | 234.5  | 19477.0   |
| 125 | ee(%) | 62  | 69.6  | -7.6  | -45.1 | 5139.4  | 189845.4  | 838.9  | 234.5  | 19477.0   |
| 126 | ee(%) | 90  | 74.7  | 15.3  | -45.1 | 5139.4  | 447722.2  | 838.9  | 234.5  | 19477.0   |
| 127 | ee(%) | 71  | 69.6  | 1.4   | -45.1 | 5139.4  | 189845.4  | 838.9  | 234.5  | 19477.0   |
| 128 | ee(%) | 81  | 74.7  | 6.3   | -45.1 | 5139.4  | 447722.2  | 838.9  | 234.5  | 19477.0   |
| 129 | ee(%) | 97  | 74.7  | 22.3  | -45.1 | 5139.4  | 447722.2  | 838.9  | 234.5  | 19477.0   |
| 130 | ee(%) | 93  | 78.2  | 14.8  | -45.1 | 5139.4  | 627788.9  | 838.9  | 234.5  | 19477.0   |
| 131 | ee(%) | -28 | -67.2 | 39.2  | 44.8  | -5105.4 | -188591.1 | -833.3 | -233.0 | -125935.5 |
| 132 | ee(%) | 65  | 66.2  | -1.2  | -44.1 | 5021.8  | 185503.5  | 819.7  | 229.2  | 123873.8  |
| 133 | ee(%) | -85 | -72.3 | -12.7 | 44.8  | -5105.4 | -444764.0 | -833.3 | -233.0 | -125935.5 |
| 134 | ee(%) | -70 | -67.2 | -2.8  | 44.8  | -5105.4 | -188591.1 | -833.3 | -233.0 | -125935.5 |



|     |       |     |       |       |      |         |           |        |        |            |
|-----|-------|-----|-------|-------|------|---------|-----------|--------|--------|------------|
| 135 | ee(%) | -71 | -72.3 | 1.3   | 44.8 | -5105.4 | -444764.0 | -833.3 | -233.0 | -125935.5  |
| 136 | ee(%) | -81 | -69.8 | -11.2 | 44.8 | -5105.4 | -316677.5 | -833.3 | -233.0 | -125935.5  |
| 137 | ee(%) | -94 | -72.3 | -21.7 | 44.8 | -5105.4 | -444764.0 | -833.3 | -233.0 | -125935.5  |
| 138 | ee(%) | -74 | -75.8 | 1.8   | 44.8 | -5105.4 | -623641.1 | -833.3 | -233.0 | -125935.5  |
| 139 | ee(%) | -82 | -69.8 | -12.2 | 44.8 | -5105.4 | -316677.5 | -833.3 | -233.0 | -125935.5  |
| 140 | ee(%) | -30 | -44.3 | 14.3  | 39.0 | -1130.7 | -367897.9 | -390.3 | -178.9 | -1063666.9 |
| 141 | ee(%) | -62 | -69.1 | 7.1   | 44.8 | -5105.4 | -188591.1 | -833.3 | -233.0 | -19348.3   |
| 142 | ee(%) | -68 | -48.9 | -19.1 | 31.7 | -3615.9 | -133570.3 | -590.2 | -165.0 | -13703.5   |
| 143 | ee(%) | -90 | -74.1 | -15.9 | 44.8 | -5105.4 | -444764.0 | -833.3 | -233.0 | -19348.3   |
| 144 | ee(%) | -71 | -69.1 | -1.9  | 44.8 | -5105.4 | -188591.1 | -833.3 | -233.0 | -19348.3   |
| 145 | ee(%) | -81 | -74.1 | -6.9  | 44.8 | -5105.4 | -444764.0 | -833.3 | -233.0 | -19348.3   |
| 146 | ee(%) | -86 | -71.6 | -14.4 | 44.8 | -5105.4 | -316677.5 | -833.3 | -233.0 | -19348.3   |
| 147 | ee(%) | -97 | -74.1 | -22.9 | 44.8 | -5105.4 | -444764.0 | -833.3 | -233.0 | -19348.3   |
| 148 | ee(%) | -93 | -77.7 | -15.3 | 44.8 | -5105.4 | -623641.1 | -833.3 | -233.0 | -19348.3   |
| 149 | ee(%) | -84 | -71.6 | -12.4 | 44.8 | -5105.4 | -316677.5 | -833.3 | -233.0 | -19348.3   |
| 150 | ee(%) | 0   | -33.1 | 33.1  | 39.0 | -1130.7 | -367897.9 | -46.6  | -178.9 | -1063666.9 |
| 151 | ee(%) | 0   | -68.6 | 68.6  | 44.8 | -5105.4 | -188591.1 | -833.3 | -233.0 | -46825.1   |
| 152 | ee(%) | -72 | -68.6 | -3.4  | 44.8 | -5105.4 | -188591.1 | -833.3 | -233.0 | -46023.7   |
| 153 | ee(%) | -61 | -68.7 | 7.7   | 44.8 | -5105.4 | -188591.1 | -833.3 | -233.0 | -43734.0   |
| 154 | ee(%) | -70 | -69.3 | -0.7  | 44.8 | -5105.4 | -188591.1 | -833.3 | -233.0 | -4293.3    |
| 155 | ee(%) | -71 | -69.1 | -1.9  | 44.8 | -5105.4 | -188591.1 | -833.3 | -233.0 | -19348.3   |
| 156 | ee(%) | -68 | -69.1 | 1.1   | 44.8 | -5105.4 | -188591.1 | -833.3 | -233.0 | -18317.9   |
| 157 | ee(%) | -27 | -67.2 | 40.2  | 44.8 | -5105.4 | -188591.1 | -833.3 | -233.0 | -125935.5  |
| 158 | ee(%) | -85 | -72.3 | -12.7 | 44.8 | -5105.4 | -444764.0 | -833.3 | -233.0 | -125935.5  |
| 159 | ee(%) | -70 | -67.2 | -2.8  | 44.8 | -5105.4 | -188591.1 | -833.3 | -233.0 | -125935.5  |
| 160 | ee(%) | -71 | -72.3 | 1.3   | 44.8 | -5105.4 | -444764.0 | -833.3 | -233.0 | -125935.5  |
| 161 | ee(%) | -67 | -32.6 | -34.4 | 39.0 | -1130.7 | -367897.9 | -46.6  | -178.9 | -1092903.8 |
| 162 | ee(%) | -94 | -72.3 | -21.7 | 44.8 | -5105.4 | -444764.0 | -833.3 | -233.0 | -125935.5  |
| 163 | ee(%) | -74 | -75.8 | 1.8   | 44.8 | -5105.4 | -623641.1 | -833.3 | -233.0 | -125935.5  |
| 164 | ee(%) | -23 | -67.2 | 44.2  | 44.8 | -5105.4 | -188591.1 | -833.3 | -233.0 | -125935.5  |
| 165 | ee(%) | -78 | -72.3 | -5.7  | 44.8 | -5105.4 | -444764.0 | -833.3 | -233.0 | -125935.5  |
| 166 | ee(%) | -70 | -67.2 | -2.8  | 44.8 | -5105.4 | -188591.1 | -833.3 | -233.0 | -125935.5  |
| 167 | ee(%) | -65 | -72.3 | 7.3   | 44.8 | -5105.4 | -444764.0 | -833.3 | -233.0 | -125935.5  |
| 168 | ee(%) | -94 | -72.3 | -21.7 | 44.8 | -5105.4 | -444764.0 | -833.3 | -233.0 | -125935.5  |
| 169 | ee(%) | -83 | -75.8 | -7.2  | 44.8 | -5105.4 | -623641.1 | -833.3 | -233.0 | -125935.5  |
| 170 | ee(%) | -63 | -69.1 | 6.1   | 44.8 | -5105.4 | -188591.1 | -833.3 | -233.0 | -19348.3   |
| 171 | ee(%) | -92 | -74.1 | -17.9 | 44.8 | -5105.4 | -444764.0 | -833.3 | -233.0 | -19348.3   |
| 172 | ee(%) | -65 | -51.1 | -13.9 | 39.0 | -1130.7 | -367897.9 | -232.2 | -178.9 | -364301.3  |
| 173 | ee(%) | -74 | -69.1 | -4.9  | 44.8 | -5105.4 | -188591.1 | -833.3 | -233.0 | -19348.3   |
| 174 | ee(%) | -85 | -74.1 | -10.9 | 44.8 | -5105.4 | -444764.0 | -833.3 | -233.0 | -19348.3   |
| 175 | ee(%) | -99 | -74.1 | -24.9 | 44.8 | -5105.4 | -444764.0 | -833.3 | -233.0 | -19348.3   |
| 176 | ee(%) | -95 | -55.0 | -40.0 | 31.7 | -3615.9 | -441696.0 | -590.2 | -165.0 | -13703.5   |
| 177 | ee(%) | -62 | -69.1 | 7.1   | 44.8 | -5105.4 | -188591.1 | -833.3 | -233.0 | -19348.3   |
| 178 | ee(%) | -90 | -74.1 | -15.9 | 44.8 | -5105.4 | -444764.0 | -833.3 | -233.0 | -19348.3   |
| 179 | ee(%) | -71 | -69.1 | -1.9  | 44.8 | -5105.4 | -188591.1 | -833.3 | -233.0 | -19348.3   |
| 180 | ee(%) | -81 | -74.1 | -6.9  | 44.8 | -5105.4 | -444764.0 | -833.3 | -233.0 | -19348.3   |
| 181 | ee(%) | -97 | -74.1 | -22.9 | 44.8 | -5105.4 | -444764.0 | -833.3 | -233.0 | -19348.3   |

|     |       |     |       |       |       |         |           |        |        |            |
|-----|-------|-----|-------|-------|-------|---------|-----------|--------|--------|------------|
| 182 | ee(%) | -93 | -77.7 | -15.3 | 44.8  | -5105.4 | -623641.1 | -833.3 | -233.0 | -19348.3   |
| 183 | ee(%) | -66 | -51.1 | -14.9 | 39.0  | -1130.7 | -367897.9 | -232.2 | -178.9 | -364301.3  |
| 184 | ee(%) | -66 | -73.4 | 7.4   | 56.0  | -1622.9 | -528054.9 | -333.3 | -256.8 | -522892.6  |
| 185 | ee(%) | -70 | -78.6 | 8.6   | 56.0  | -1622.9 | -528054.9 | -333.3 | -256.8 | -225143.6  |
| 186 | ee(%) | -68 | -52.0 | -16.0 | 39.0  | -1130.7 | -367897.9 | -232.2 | -178.9 | -313716.8  |
| 188 | ee(%) | -63 | -54.7 | -8.3  | 39.0  | -1130.7 | -367897.9 | -390.3 | -178.9 | -455376.6  |
| 189 | ee(%) | -63 | -41.1 | -21.9 | 39.0  | -1130.7 | -367897.9 | -116.1 | -178.9 | -728602.5  |
| 190 | ee(%) | -63 | -48.6 | -14.4 | 39.0  | -1130.7 | -367897.9 | -348.3 | -178.9 | -728602.5  |
| 191 | ee(%) | -58 | -51.1 | -6.9  | 39.0  | -1130.7 | -367897.9 | -232.2 | -178.9 | -364301.3  |
| 193 | ee(%) | -62 | -41.5 | -20.5 | 39.0  | -1130.7 | -367897.9 | -46.6  | -178.9 | -573600.5  |
| 194 | ee(%) | -49 | -49.3 | 0.3   | 39.0  | -1130.7 | -367897.9 | -232.2 | -178.9 | -470555.8  |
| 195 | ee(%) | -40 | -56.8 | 16.8  | 39.0  | -1130.7 | -367897.9 | -232.2 | -178.9 | -34805.9   |
| 196 | ee(%) | -57 | -54.7 | -2.3  | 39.0  | -1130.7 | -367897.9 | -232.2 | -178.9 | -156858.4  |
| 197 | ee(%) | -55 | -49.3 | -5.7  | 39.0  | -1130.7 | -367897.9 | -232.2 | -178.9 | -470555.8  |
| 198 | ee(%) | -11 | -56.1 | 45.1  | 39.0  | -1130.7 | -617765.2 | -232.2 | -178.9 | -364301.3  |
| 199 | ee(%) | -34 | -43.5 | 9.5   | 34.4  | -996.8  | -324320.1 | -204.7 | -157.7 | -414818.2  |
| 200 | ee(%) | -41 | -46.2 | 5.2   | 34.4  | -996.8  | -641361.5 | -204.7 | -157.7 | -625116.6  |
| 201 | ee(%) | -53 | -43.5 | -9.5  | 34.4  | -996.8  | -641361.5 | -41.1  | -157.7 | -468837.4  |
| 202 | ee(%) | -28 | -46.1 | 18.1  | 34.4  | -996.8  | -641361.5 | -41.1  | -157.7 | -321149.5  |
| 203 | ee(%) | -57 | -44.2 | -12.8 | 34.4  | -996.8  | -641361.5 | -41.1  | -157.7 | -429563.1  |
| 204 | ee(%) | -55 | -44.2 | -10.8 | 34.4  | -996.8  | -641361.5 | -41.1  | -157.7 | -429563.1  |
| 205 | ee(%) | -46 | -53.2 | 7.2   | 34.4  | -996.8  | -641361.5 | -204.7 | -157.7 | -214781.5  |
| 206 | ee(%) | -56 | -42.9 | -13.1 | 34.4  | -996.8  | -641361.5 | -41.1  | -157.7 | -505657.1  |
| 207 | ee(%) | -54 | -43.8 | -10.2 | 34.4  | -996.8  | -458115.4 | -61.6  | -157.7 | -282284.3  |
| 208 | ee(%) | -30 | -55.5 | 25.5  | 34.4  | -996.8  | -458115.4 | -516.1 | -157.7 | -461473.5  |
| 209 | ee(%) | -37 | -55.8 | 18.8  | 34.4  | -996.8  | -458115.4 | -344.1 | -157.7 | -117209.4  |
| 210 | ee(%) | -53 | -52.3 | -0.7  | 34.4  | -996.8  | -458115.4 | -344.1 | -157.7 | -321149.5  |
| 211 | ee(%) | -10 | -31.1 | 21.1  | 34.4  | -996.8  | -419778.6 | -41.1  | -157.7 | -937674.8  |
| 212 | ee(%) | -50 | -39.7 | -10.3 | 56.0  | -1622.9 | -132013.7 | -66.9  | -256.8 | -1526713.3 |
| 213 | ee(%) | -71 | -59.3 | -11.7 | 39.9  | -1576.9 | -367897.9 | -232.2 | -254.7 | -728602.5  |
| 214 | ee(%) | 69  | 84.7  | -15.7 | -56.9 | 2250.8  | 525117.6  | 331.5  | 363.5  | 1039968.0  |
| 215 | ee(%) | -61 | -55.7 | -5.3  | 39.9  | -1576.9 | -183948.9 | -232.2 | -254.7 | -728602.5  |
| 216 | ee(%) | -63 | -44.2 | -18.8 | 38.5  | -1130.7 | -367897.9 | -232.2 | -169.2 | -728602.5  |
| 217 | ee(%) | -72 | -46.4 | -25.6 | 42.2  | -238.3  | -367897.9 | -232.2 | -180.5 | -728602.5  |
| 218 | ee(%) | -67 | -47.0 | -20.0 | 40.4  | -684.5  | -367897.9 | -232.2 | -179.7 | -728602.5  |
| 219 | ee(%) | -69 | -66.6 | -2.4  | 42.3  | -684.5  | -367897.9 | -232.2 | -256.2 | -728602.5  |
| 220 | ee(%) | -7  | -44.9 | 37.9  | 39.0  | -1130.7 | -367897.9 | -232.2 | -178.9 | -728602.5  |
| 221 | ee(%) | -63 | -44.9 | -18.1 | 39.0  | -1130.7 | -367897.9 | -232.2 | -178.9 | -728602.5  |
| 222 | ee(%) | -30 | -41.4 | 11.4  | 37.8  | -1576.9 | -367897.9 | -232.2 | -178.1 | -728602.5  |
| 223 | ee(%) | -71 | -63.5 | -7.5  | 41.0  | -1130.7 | -367897.9 | -232.2 | -255.4 | -728602.5  |
| 224 | ee(%) | -66 | -86.9 | 20.9  | 42.3  | -1130.7 | -367897.9 | -232.2 | -332.0 | -728602.5  |
| 225 | ee(%) | -61 | -33.7 | -27.3 | 37.1  | -3345.7 | -367897.9 | -232.2 | -257.3 | -728602.5  |
| 226 | ee(%) | -61 | -59.3 | -1.7  | 39.9  | -1576.9 | -367897.9 | -232.2 | -254.7 | -728602.5  |
| 227 | ee(%) | -28 | -31.0 | 3.0   | 36.3  | -2453.3 | -367897.9 | -232.2 | -182.3 | -728602.5  |
| 228 | ee(%) | -64 | -66.1 | 2.1   | 40.0  | -238.3  | -367897.9 | -232.2 | -190.4 | -728602.5  |
| 229 | ee(%) | 0   | -33.9 | 33.9  | 39.5  | -861.4  | -367897.9 | -232.2 | -145.6 | -728602.5  |
| 230 | ee(%) | -99 | -50.2 | -48.8 | 41.1  | -861.4  | -367897.9 | -232.2 | -210.2 | -728602.5  |

|     |        |     |       |       |       |         |           |        |        |            |
|-----|--------|-----|-------|-------|-------|---------|-----------|--------|--------|------------|
| 231 | ee(%)  | -64 | -55.9 | -8.1  | 39.0  | -238.3  | -367897.9 | -232.2 | -149.7 | -728602.5  |
| 232 | ee(%)  | 0   | -51.3 | 51.3  | 39.4  | -1130.7 | -367897.9 | -232.2 | -200.5 | -728602.5  |
| 233 | ee(%)  | 0   | -4.9  | 4.9   | 37.8  | -1576.9 | -367897.9 | -232.2 | -92.8  | -728602.5  |
| 234 | ee(%)  | 0   | -28.0 | 28.0  | 37.9  | -2112.5 | -367897.9 | -232.2 | -182.3 | -728602.5  |
| 235 | ee(%)  | -56 | -27.6 | -28.4 | 39.0  | -1130.7 | -91974.5  | -46.6  | -178.9 | -1063666.9 |
| 236 | ee(%)  | 68  | 61.1  | 6.9   | -45.8 | 6281.7  | 46375.9   | 1311.5 | 289.0  | 33783.8    |
| 237 | ee(%)  | 68  | 53.0  | 15.0  | -46.4 | 6281.7  | 92751.8   | 819.7  | 319.4  | 135135.0   |
| 238 | ee(%)  | -90 | -72.0 | -18.0 | 45.7  | -5105.4 | -94295.5  | -833.3 | -264.0 | -137384.2  |
| 239 | ee(%)  | -63 | -33.1 | -29.9 | 39.0  | -1130.7 | -367897.9 | -46.6  | -178.9 | -1063666.9 |
| 241 | ee(%)  | -96 | -72.0 | -24.0 | 45.7  | -5105.4 | -94295.5  | -833.3 | -266.7 | -206076.3  |
| 242 | ee(%)  | -71 | -79.3 | 8.3   | 46.6  | -5105.4 | -94295.5  | -833.3 | -297.7 | -206076.3  |
| 243 | ee(%)  | -16 | -65.2 | 49.2  | 44.8  | -5105.4 | -94295.5  | -833.3 | -233.0 | -137384.2  |
| 244 | ee(%)  | -60 | -54.8 | -5.2  | 44.8  | -5105.4 | -94295.5  | -833.3 | -233.0 | -743373.5  |
| 245 | ee(%)  | -7  | -54.8 | 47.8  | 44.8  | -5105.4 | -94295.5  | -833.3 | -233.0 | -743373.5  |
| 246 | ee(%)  | -69 | -38.8 | -30.2 | 44.8  | -5105.4 | -94295.5  | -56.2  | -233.0 | -206076.3  |
| 247 | ee(%)  | 24  | 51.6  | -27.6 | -33.3 | 3715.8  | 68629.5   | 606.5  | 192.2  | 149985.0   |
| 248 | ee(%)  | 77  | 53.9  | 23.1  | -36.0 | 3715.8  | 68629.5   | 606.5  | 244.3  | 199980.0   |
| 249 | ee(%)  | 0   | -39.1 | 39.1  | 39.0  | -1130.7 | -367897.9 | -232.2 | -178.9 | -1063666.9 |
| 250 | ee(%)  | 0   | -48.9 | 48.9  | 49.4  | -5105.4 | -94295.5  | -56.2  | -335.6 | -274768.4  |
| 251 | ee(%)  | 72  | 66.0  | 6.0   | -44.1 | 5021.8  | 185503.5  | 819.7  | 229.2  | 135135.0   |
| 252 | ee(%)  | 0   | -49.2 | 49.2  | 31.7  | -3615.9 | -224288.0 | -590.2 | -165.0 | -97302.9   |
| 253 | ee(%)  | -74 | -49.2 | -24.8 | 31.7  | -3615.9 | -224288.0 | -590.2 | -165.0 | -97302.9   |
| 254 | ee(%)  | -46 | -49.2 | 3.2   | 31.7  | -3615.9 | -224288.0 | -590.2 | -165.0 | -97302.9   |
| 255 | ee(%)  | -14 | -52.6 | 38.6  | 31.7  | -3615.9 | -392061.7 | -590.2 | -165.0 | -97302.9   |
| 256 | ee(%)  | -28 | -67.0 | 39.0  | 44.8  | -5105.4 | -188591.1 | -833.3 | -233.0 | -137384.2  |
| 257 | ee(%)  | 29  | 34.6  | -5.6  | -22.3 | 2538.5  | 157458.0  | 414.3  | 115.9  | 68310.0    |
| 258 | ee(%)  | -47 | -49.2 | 2.2   | 31.7  | -3615.9 | -224288.0 | -590.2 | -165.0 | -97302.9   |
| 259 | ee(%)  | 40  | 34.7  | 5.3   | -22.3 | 2538.5  | 157458.0  | 414.3  | 115.9  | 62617.5    |
| 260 | ee(%)  | -29 | -26.2 | -2.8  | 39.0  | -1130.7 | -367897.9 | -46.6  | -178.9 | -1462542.0 |
| 381 | Yld(%) | 5   | 20.5  | -15.5 | -28.9 | 837.1   | 68095.4   | 34.5   | 132.5  | 787509.9   |
| 382 | Yld(%) | 17  | 24.5  | -7.5  | -28.9 | 837.1   | 272381.5  | 34.5   | 132.5  | 787509.9   |
| 383 | Yld(%) | 7   | 29.0  | -22.0 | -28.9 | 837.1   | 272381.5  | 171.9  | 132.5  | 787509.9   |
| 384 | Yld(%) | 3   | 19.5  | -16.5 | -28.9 | 837.1   | 272381.5  | 34.5   | 132.5  | 1082826.1  |
| 385 | Yld(%) | 8   | 32.8  | -24.8 | -28.9 | 837.1   | 272381.5  | 289.0  | 132.5  | 787509.9   |
| 386 | Yld(%) | 0   | 24.5  | -24.5 | -28.9 | 837.1   | 272381.5  | 34.5   | 132.5  | 787509.9   |
| 387 | Yld(%) | 33  | 24.2  | 8.8   | -28.9 | 837.1   | 272381.5  | 34.5   | 132.5  | 809156.1   |
| 388 | Yld(%) | 70  | 37.9  | 32.1  | -28.9 | 837.1   | 272381.5  | 171.9  | 132.5  | 269718.7   |
| 389 | Yld(%) | 72  | 37.9  | 34.1  | -28.9 | 837.1   | 272381.5  | 171.9  | 132.5  | 269718.7   |
| 390 | Yld(%) | 82  | 50.4  | 31.6  | -38.4 | 1112.4  | 361925.3  | 228.5  | 176.0  | 358387.0   |
| 391 | Yld(%) | 66  | 53.9  | 12.1  | -38.4 | 1112.4  | 361925.3  | 228.5  | 176.0  | 154311.9   |
| 392 | Yld(%) | 11  | 38.5  | -27.5 | -28.9 | 837.1   | 272381.5  | 171.9  | 132.5  | 232267.3   |
| 393 | Yld(%) | 10  | 35.6  | -25.6 | -28.9 | 837.1   | 272381.5  | 171.9  | 132.5  | 404578.0   |
| 394 | Yld(%) | 65  | 40.5  | 24.5  | -28.9 | 837.1   | 272381.5  | 289.0  | 132.5  | 337148.4   |
| 395 | Yld(%) | 76  | 30.5  | 45.5  | -28.9 | 837.1   | 272381.5  | 86.0   | 132.5  | 539437.4   |
| 396 | Yld(%) | 43  | 36.1  | 6.9   | -28.9 | 837.1   | 272381.5  | 257.9  | 132.5  | 539437.4   |
| 397 | Yld(%) | 46  | 37.9  | 8.1   | -28.9 | 837.1   | 272381.5  | 171.9  | 132.5  | 269718.7   |
| 398 | Yld(%) | 13  | 31.9  | -18.9 | -28.9 | 837.1   | 272381.5  | 34.5   | 132.5  | 360770.2   |

|     |        |    |      |       |       |        |          |        |       |           |
|-----|--------|----|------|-------|-------|--------|----------|--------|-------|-----------|
| 399 | Yld(%) | 19 | 30.8 | -11.8 | -28.9 | 837.1  | 272381.5 | 34.5   | 132.5 | 424678.1  |
| 400 | Yld(%) | 75 | 36.5 | 38.5  | -28.9 | 837.1  | 272381.5 | 171.9  | 132.5 | 348386.7  |
| 401 | Yld(%) | 5  | 42.1 | -37.1 | -28.9 | 837.1  | 272381.5 | 171.9  | 132.5 | 25769.3   |
| 402 | Yld(%) | 33 | 40.5 | -7.5  | -28.9 | 837.1  | 272381.5 | 171.9  | 132.5 | 116133.7  |
| 403 | Yld(%) | 54 | 36.5 | 17.5  | -28.9 | 837.1  | 272381.5 | 171.9  | 132.5 | 348386.7  |
| 404 | Yld(%) | 70 | 41.6 | 28.4  | -28.9 | 837.1  | 457376.5 | 171.9  | 132.5 | 269718.7  |
| 405 | Yld(%) | 18 | 37.9 | -19.9 | -29.9 | 867.2  | 282170.2 | 178.1  | 137.2 | 360906.8  |
| 406 | Yld(%) | 73 | 40.2 | 32.8  | -29.9 | 867.2  | 558007.7 | 178.1  | 137.2 | 543874.0  |
| 407 | Yld(%) | 59 | 37.9 | 21.1  | -29.9 | 867.2  | 558007.7 | 35.7   | 137.2 | 407905.5  |
| 408 | Yld(%) | 44 | 40.1 | 3.9   | -29.9 | 867.2  | 558007.7 | 35.7   | 137.2 | 279411.7  |
| 409 | Yld(%) | 69 | 38.5 | 30.5  | -29.9 | 867.2  | 558007.7 | 35.7   | 137.2 | 373735.4  |
| 410 | Yld(%) | 43 | 38.5 | 4.5   | -29.9 | 867.2  | 558007.7 | 35.7   | 137.2 | 373735.4  |
| 411 | Yld(%) | 24 | 46.3 | -22.3 | -29.9 | 867.2  | 558007.7 | 178.1  | 137.2 | 186867.7  |
| 412 | Yld(%) | 18 | 37.4 | -19.4 | -29.9 | 867.2  | 558007.7 | 35.7   | 137.2 | 439939.9  |
| 413 | Yld(%) | 8  | 38.1 | -30.1 | -29.9 | 867.2  | 398576.9 | 53.6   | 137.2 | 245597.5  |
| 414 | Yld(%) | 75 | 45.8 | 29.2  | -29.9 | 867.2  | 398576.9 | 449.0  | 137.2 | 543874.0  |
| 415 | Yld(%) | 34 | 48.6 | -14.6 | -29.9 | 867.2  | 398576.9 | 299.4  | 137.2 | 101976.4  |
| 416 | Yld(%) | 8  | 45.5 | -37.5 | -29.9 | 867.2  | 398576.9 | 299.4  | 137.2 | 279411.7  |
| 417 | Yld(%) | 9  | 27.1 | -18.1 | -29.9 | 867.2  | 365222.5 | 35.7   | 137.2 | 815811.0  |
| 418 | Yld(%) | 4  | 27.3 | -23.3 | -38.4 | 1112.4 | 90481.3  | 45.8   | 176.0 | 1046398.8 |
| 419 | Yld(%) | 66 | 43.9 | 22.1  | -29.5 | 1167.5 | 272381.5 | 171.9  | 188.5 | 539437.4  |
| 420 | Yld(%) | 51 | 62.6 | -11.6 | -42.1 | 1663.6 | 388130.4 | 245.0  | 268.7 | 768672.0  |
| 421 | Yld(%) | 54 | 41.2 | 12.8  | -29.5 | 1167.5 | 136190.8 | 171.9  | 188.5 | 539437.4  |
| 422 | Yld(%) | 58 | 32.8 | 25.2  | -28.5 | 837.1  | 272381.5 | 171.9  | 125.3 | 539437.4  |
| 423 | Yld(%) | 38 | 34.4 | 3.6   | -31.2 | 176.4  | 272381.5 | 171.9  | 133.6 | 539437.4  |
| 424 | Yld(%) | 60 | 34.8 | 25.2  | -29.9 | 506.8  | 272381.5 | 171.9  | 133.0 | 539437.4  |
| 425 | Yld(%) | 60 | 49.4 | 10.6  | -31.3 | 506.8  | 272381.5 | 171.9  | 189.7 | 539437.4  |
| 426 | Yld(%) | 55 | 33.3 | 21.7  | -28.9 | 837.1  | 272381.5 | 171.9  | 132.5 | 539437.4  |
| 427 | Yld(%) | 51 | 33.3 | 17.7  | -28.9 | 837.1  | 272381.5 | 171.9  | 132.5 | 539437.4  |
| 428 | Yld(%) | 13 | 30.7 | -17.7 | -28.0 | 1167.5 | 272381.5 | 171.9  | 131.9 | 539437.4  |
| 429 | Yld(%) | 66 | 47.0 | 19.0  | -30.4 | 837.1  | 272381.5 | 171.9  | 189.1 | 539437.4  |
| 430 | Yld(%) | 46 | 64.4 | -18.4 | -31.3 | 837.1  | 272381.5 | 171.9  | 245.8 | 539437.4  |
| 431 | Yld(%) | 54 | 25.0 | 29.0  | -27.5 | 2477.1 | 272381.5 | 171.9  | 190.5 | 539437.4  |
| 432 | Yld(%) | 68 | 43.9 | 24.1  | -29.5 | 1167.5 | 272381.5 | 171.9  | 188.5 | 539437.4  |
| 433 | Yld(%) | 10 | 23.0 | -13.0 | -26.8 | 1816.4 | 272381.5 | 171.9  | 135.0 | 539437.4  |
| 434 | Yld(%) | 49 | 49.0 | 0.0   | -29.6 | 176.4  | 272381.5 | 171.9  | 141.0 | 539437.4  |
| 435 | Yld(%) | 0  | 25.2 | -25.2 | -29.3 | 637.8  | 272381.5 | 171.9  | 107.8 | 539437.4  |
| 436 | Yld(%) | 11 | 37.2 | -26.2 | -30.5 | 637.8  | 272381.5 | 171.9  | 155.6 | 539437.4  |
| 437 | Yld(%) | 45 | 41.4 | 3.6   | -28.9 | 176.4  | 272381.5 | 171.9  | 110.8 | 539437.4  |
| 438 | Yld(%) | 0  | 38.1 | -38.1 | -29.2 | 837.1  | 272381.5 | 171.9  | 148.4 | 539437.4  |
| 439 | Yld(%) | 0  | 3.7  | -3.7  | -28.0 | 1167.5 | 272381.5 | 171.9  | 68.7  | 539437.4  |
| 440 | Yld(%) | 0  | 20.8 | -20.8 | -28.1 | 1564.1 | 272381.5 | 171.9  | 135.0 | 539437.4  |
| 441 | Yld(%) | 82 | 63.3 | 18.7  | -47.4 | 6504.2 | 48018.0  | 1357.9 | 299.2 | 34980.0   |
| 442 | Yld(%) | 78 | 49.4 | 28.6  | -31.3 | 3499.2 | 64629.5  | 571.2  | 181.0 | 94162.2   |
| 443 | Yld(%) | 83 | 44.7 | 38.3  | -30.7 | 3499.2 | 64629.5  | 571.2  | 159.7 | 94162.2   |
| 444 | Yld(%) | 7  | 51.6 | -44.6 | -33.9 | 3499.2 | 64629.5  | 571.2  | 230.0 | 141243.3  |
| 445 | Yld(%) | 71 | 49.4 | 21.6  | -31.3 | 3499.2 | 64629.5  | 571.2  | 182.8 | 141243.3  |

|     |        |    |      |       |       |        |          |        |       |          |
|-----|--------|----|------|-------|-------|--------|----------|--------|-------|----------|
| 446 | Yld(%) | 68 | 54.4 | 13.6  | -31.9 | 3499.2 | 64629.5  | 571.2  | 204.1 | 141243.3 |
| 447 | Yld(%) | 63 | 44.7 | 18.3  | -30.7 | 3499.2 | 64629.5  | 571.2  | 159.7 | 94162.2  |
| 448 | Yld(%) | 60 | 37.6 | 22.4  | -30.7 | 3499.2 | 64629.5  | 571.2  | 159.7 | 509503.1 |
| 449 | Yld(%) | 54 | 37.6 | 16.4  | -30.7 | 3499.2 | 64629.5  | 571.2  | 159.7 | 509503.1 |
| 450 | Yld(%) | 74 | 26.6 | 47.4  | -30.7 | 3499.2 | 64629.5  | 38.5   | 159.7 | 141243.3 |
| 451 | Yld(%) | 61 | 64.8 | -3.8  | -41.8 | 4672.3 | 86296.5  | 762.6  | 241.6 | 188595.0 |
| 452 | Yld(%) | 66 | 67.8 | -1.8  | -45.2 | 4672.3 | 86296.5  | 762.6  | 307.1 | 251460.0 |
| 453 | Yld(%) | 0  | 33.5 | -33.5 | -33.9 | 3499.2 | 64629.5  | 38.5   | 230.0 | 188324.4 |
| 454 | Yld(%) | 88 | 68.3 | 19.7  | -45.7 | 5199.7 | 192072.0 | 848.7  | 237.3 | 139920.0 |
| 455 | Yld(%) | 0  | 68.0 | -68.0 | -43.8 | 4991.2 | 309591.3 | 814.7  | 227.8 | 134310.0 |
| 456 | Yld(%) | 93 | 68.0 | 25.0  | -43.8 | 4991.2 | 309591.3 | 814.7  | 227.8 | 134310.0 |
| 457 | Yld(%) | 84 | 68.0 | 16.0  | -43.8 | 4991.2 | 309591.3 | 814.7  | 227.8 | 134310.0 |
| 458 | Yld(%) | 73 | 72.6 | 0.4   | -43.8 | 4991.2 | 541174.3 | 814.7  | 227.8 | 134310.0 |
| 459 | Yld(%) | 42 | 46.0 | -4.0  | -30.7 | 3499.2 | 129259.0 | 571.2  | 159.7 | 94162.2  |
| 460 | Yld(%) | 90 | 89.3 | 0.7   | -57.5 | 6548.6 | 406196.0 | 1068.9 | 298.9 | 176220.0 |
| 461 | Yld(%) | 77 | 68.0 | 9.0   | -43.8 | 4991.2 | 309591.3 | 814.7  | 227.8 | 134310.0 |
| 462 | Yld(%) | 88 | 89.3 | -1.3  | -57.5 | 6548.6 | 406196.0 | 1068.9 | 298.9 | 176220.0 |
| 463 | Yld(%) | 98 | 46.1 | 51.9  | -30.7 | 3499.2 | 129259.0 | 571.2  | 159.7 | 86315.4  |
| 464 | Yld(%) | 42 | 68.5 | -26.5 | -45.7 | 5199.7 | 192072.0 | 848.7  | 237.3 | 128260.0 |
| 465 | Yld(%) | 53 | 49.6 | 3.4   | -30.7 | 3499.2 | 304838.2 | 571.2  | 159.7 | 86315.4  |
| 466 | Yld(%) | 91 | 46.1 | 44.9  | -30.7 | 3499.2 | 129259.0 | 571.2  | 159.7 | 86315.4  |
| 467 | Yld(%) | 93 | 49.6 | 43.4  | -30.7 | 3499.2 | 304838.2 | 571.2  | 159.7 | 86315.4  |
| 468 | Yld(%) | 54 | 47.9 | 6.1   | -30.7 | 3499.2 | 217048.6 | 571.2  | 159.7 | 86315.4  |
| 469 | Yld(%) | 76 | 49.6 | 26.4  | -30.7 | 3499.2 | 304838.2 | 571.2  | 159.7 | 86315.4  |
| 470 | Yld(%) | 59 | 52.0 | 7.0   | -30.7 | 3499.2 | 427439.3 | 571.2  | 159.7 | 86315.4  |
| 471 | Yld(%) | 18 | 47.9 | -29.9 | -30.7 | 3499.2 | 217048.6 | 571.2  | 159.7 | 86315.4  |
| 472 | Yld(%) | 55 | 47.4 | 7.6   | -30.7 | 3499.2 | 129259.0 | 571.2  | 159.7 | 13261.2  |
| 473 | Yld(%) | 80 | 67.5 | 12.5  | -43.8 | 4991.2 | 184371.0 | 814.7  | 227.8 | 18915.3  |
| 474 | Yld(%) | 35 | 50.8 | -15.8 | -30.7 | 3499.2 | 304838.2 | 571.2  | 159.7 | 13261.2  |
| 475 | Yld(%) | 35 | 47.4 | -12.4 | -30.7 | 3499.2 | 129259.0 | 571.2  | 159.7 | 13261.2  |
| 476 | Yld(%) | 56 | 50.8 | 5.2   | -30.7 | 3499.2 | 304838.2 | 571.2  | 159.7 | 13261.2  |
| 477 | Yld(%) | 56 | 49.1 | 6.9   | -30.7 | 3499.2 | 217048.6 | 571.2  | 159.7 | 13261.2  |
| 478 | Yld(%) | 6  | 50.8 | -44.8 | -30.7 | 3499.2 | 304838.2 | 571.2  | 159.7 | 13261.2  |
| 479 | Yld(%) | 19 | 53.3 | -34.3 | -30.7 | 3499.2 | 427439.3 | 571.2  | 159.7 | 13261.2  |
| 480 | Yld(%) | 18 | 49.1 | -31.1 | -30.7 | 3499.2 | 217048.6 | 571.2  | 159.7 | 13261.2  |
| 481 | Yld(%) | 0  | 47.1 | -47.1 | -30.7 | 3499.2 | 129259.0 | 571.2  | 159.7 | 32093.6  |
| 482 | Yld(%) | 9  | 47.1 | -38.1 | -30.7 | 3499.2 | 129259.0 | 571.2  | 159.7 | 31544.3  |
| 483 | Yld(%) | 24 | 47.1 | -23.1 | -30.7 | 3499.2 | 129259.0 | 571.2  | 159.7 | 29975.0  |
| 484 | Yld(%) | 71 | 47.6 | 23.4  | -30.7 | 3499.2 | 129259.0 | 571.2  | 159.7 | 2942.6   |
| 485 | Yld(%) | 46 | 47.4 | -1.4  | -30.7 | 3499.2 | 129259.0 | 571.2  | 159.7 | 13261.2  |
| 486 | Yld(%) | 57 | 47.4 | 9.6   | -30.7 | 3499.2 | 129259.0 | 571.2  | 159.7 | 12555.0  |
| 487 | Yld(%) | 96 | 46.1 | 49.9  | -30.7 | 3499.2 | 129259.0 | 571.2  | 159.7 | 86315.4  |
| 488 | Yld(%) | 50 | 49.6 | 0.4   | -30.7 | 3499.2 | 304838.2 | 571.2  | 159.7 | 86315.4  |
| 489 | Yld(%) | 87 | 46.1 | 40.9  | -30.7 | 3499.2 | 129259.0 | 571.2  | 159.7 | 86315.4  |
| 490 | Yld(%) | 91 | 49.6 | 41.4  | -30.7 | 3499.2 | 304838.2 | 571.2  | 159.7 | 86315.4  |
| 491 | Yld(%) | 58 | 49.6 | 8.4   | -30.7 | 3499.2 | 304838.2 | 571.2  | 159.7 | 86315.4  |
| 492 | Yld(%) | 58 | 52.0 | 6.0   | -30.7 | 3499.2 | 427439.3 | 571.2  | 159.7 | 86315.4  |

|     |        |     |      |       |       |        |          |       |       |          |
|-----|--------|-----|------|-------|-------|--------|----------|-------|-------|----------|
| 493 | Yld(%) | 96  | 46.1 | 49.9  | -30.7 | 3499.2 | 129259.0 | 571.2 | 159.7 | 86315.4  |
| 494 | Yld(%) | 39  | 49.6 | -10.6 | -30.7 | 3499.2 | 304838.2 | 571.2 | 159.7 | 86315.4  |
| 495 | Yld(%) | 54  | 46.1 | 7.9   | -30.7 | 3499.2 | 129259.0 | 571.2 | 159.7 | 86315.4  |
| 496 | Yld(%) | 70  | 49.6 | 20.4  | -30.7 | 3499.2 | 304838.2 | 571.2 | 159.7 | 86315.4  |
| 497 | Yld(%) | 16  | 49.6 | -33.6 | -30.7 | 3499.2 | 304838.2 | 571.2 | 159.7 | 86315.4  |
| 498 | Yld(%) | 3   | 52.0 | -49.0 | -30.7 | 3499.2 | 427439.3 | 571.2 | 159.7 | 86315.4  |
| 499 | Yld(%) | 45  | 47.4 | -2.4  | -30.7 | 3499.2 | 129259.0 | 571.2 | 159.7 | 13261.2  |
| 500 | Yld(%) | 31  | 50.8 | -19.8 | -30.7 | 3499.2 | 304838.2 | 571.2 | 159.7 | 13261.2  |
| 501 | Yld(%) | 52  | 47.4 | 4.6   | -30.7 | 3499.2 | 129259.0 | 571.2 | 159.7 | 13261.2  |
| 502 | Yld(%) | 63  | 50.8 | 12.2  | -30.7 | 3499.2 | 304838.2 | 571.2 | 159.7 | 13261.2  |
| 503 | Yld(%) | 3   | 50.8 | -47.8 | -30.7 | 3499.2 | 304838.2 | 571.2 | 159.7 | 13261.2  |
| 504 | Yld(%) | 9   | 53.3 | -44.3 | -30.7 | 3499.2 | 427439.3 | 571.2 | 159.7 | 13261.2  |
| 505 | Yld(%) | 51  | 47.4 | 3.6   | -30.7 | 3499.2 | 129259.0 | 571.2 | 159.7 | 13261.2  |
| 506 | Yld(%) | 16  | 50.8 | -34.8 | -30.7 | 3499.2 | 304838.2 | 571.2 | 159.7 | 13261.2  |
| 507 | Yld(%) | 33  | 47.4 | -14.4 | -30.7 | 3499.2 | 129259.0 | 571.2 | 159.7 | 13261.2  |
| 508 | Yld(%) | 47  | 50.8 | -3.8  | -30.7 | 3499.2 | 304838.2 | 571.2 | 159.7 | 13261.2  |
| 509 | Yld(%) | 0,4 | 50.8 | -50.4 | -30.7 | 3499.2 | 304838.2 | 571.2 | 159.7 | 13261.2  |
| 510 | Yld(%) | 4   | 53.3 | -49.3 | -30.7 | 3499.2 | 427439.3 | 571.2 | 159.7 | 13261.2  |
| 511 | Yld(%) | 98  | 46.2 | 51.8  | -30.8 | 3503.2 | 129404.9 | 571.8 | 159.9 | 86412.8  |
| 512 | Yld(%) | 42  | 68.5 | -26.5 | -45.7 | 5199.7 | 192072.0 | 848.7 | 237.3 | 128260.0 |
| 513 | Yld(%) | 53  | 49.6 | 3.4   | -30.8 | 3503.2 | 305182.3 | 571.8 | 159.9 | 86412.8  |
| 514 | Yld(%) | 91  | 46.2 | 44.8  | -30.8 | 3503.2 | 129404.9 | 571.8 | 159.9 | 86412.8  |
| 515 | Yld(%) | 93  | 49.6 | 43.4  | -30.8 | 3503.2 | 305182.3 | 571.8 | 159.9 | 86412.8  |
| 516 | Yld(%) | 54  | 47.9 | 6.1   | -30.8 | 3503.2 | 217293.6 | 571.8 | 159.9 | 86412.8  |
| 517 | Yld(%) | 76  | 49.6 | 26.4  | -30.8 | 3503.2 | 305182.3 | 571.8 | 159.9 | 86412.8  |
| 518 | Yld(%) | 59  | 52.1 | 6.9   | -30.8 | 3503.2 | 427921.8 | 571.8 | 159.9 | 86412.8  |
| 519 | Yld(%) | 18  | 47.9 | -29.9 | -30.8 | 3503.2 | 217293.6 | 571.8 | 159.9 | 86412.8  |
| 520 | Yld(%) | 8   | 32.8 | -24.8 | -28.9 | 837.1  | 272381.5 | 289.0 | 132.5 | 787509.9 |
| 521 | Yld(%) | 55  | 47.4 | 7.6   | -30.8 | 3503.2 | 129404.9 | 571.8 | 159.9 | 13276.1  |
| 522 | Yld(%) | 80  | 59.2 | 20.8  | -38.4 | 4372.8 | 161526.9 | 713.7 | 199.6 | 16571.7  |
| 523 | Yld(%) | 35  | 50.9 | -15.9 | -30.8 | 3503.2 | 305182.3 | 571.8 | 159.9 | 13276.1  |
| 524 | Yld(%) | 35  | 47.4 | -12.4 | -30.8 | 3503.2 | 129404.9 | 571.8 | 159.9 | 13276.1  |
| 525 | Yld(%) | 56  | 50.9 | 5.1   | -30.8 | 3503.2 | 305182.3 | 571.8 | 159.9 | 13276.1  |
| 526 | Yld(%) | 56  | 49.1 | 6.9   | -30.8 | 3503.2 | 217293.6 | 571.8 | 159.9 | 13276.1  |
| 527 | Yld(%) | 6   | 50.9 | -44.9 | -30.8 | 3503.2 | 305182.3 | 571.8 | 159.9 | 13276.1  |
| 528 | Yld(%) | 19  | 53.3 | -34.3 | -30.8 | 3503.2 | 427921.8 | 571.8 | 159.9 | 13276.1  |
| 529 | Yld(%) | 18  | 49.1 | -31.1 | -30.8 | 3503.2 | 217293.6 | 571.8 | 159.9 | 13276.1  |
| 530 | Yld(%) | 0   | 24.5 | -24.5 | -28.9 | 837.1  | 272381.5 | 34.5  | 132.5 | 787509.9 |
| 531 | Yld(%) | 0   | 47.1 | -47.1 | -30.8 | 3503.2 | 129404.9 | 571.8 | 159.9 | 32129.8  |
| 532 | Yld(%) | 9   | 47.1 | -38.1 | -30.8 | 3503.2 | 129404.9 | 571.8 | 159.9 | 31579.9  |
| 533 | Yld(%) | 24  | 47.1 | -23.1 | -30.8 | 3503.2 | 129404.9 | 571.8 | 159.9 | 30008.8  |
| 534 | Yld(%) | 71  | 47.6 | 23.4  | -30.8 | 3503.2 | 129404.9 | 571.8 | 159.9 | 2945.9   |
| 535 | Yld(%) | 46  | 47.4 | -1.4  | -30.8 | 3503.2 | 129404.9 | 571.8 | 159.9 | 13276.1  |
| 536 | Yld(%) | 57  | 47.4 | 9.6   | -30.8 | 3503.2 | 129404.9 | 571.8 | 159.9 | 12569.1  |
| 537 | Yld(%) | 96  | 46.2 | 49.8  | -30.8 | 3503.2 | 129404.9 | 571.8 | 159.9 | 86412.8  |
| 538 | Yld(%) | 50  | 49.6 | 0.4   | -30.8 | 3503.2 | 305182.3 | 571.8 | 159.9 | 86412.8  |
| 539 | Yld(%) | 87  | 46.2 | 40.8  | -30.8 | 3503.2 | 129404.9 | 571.8 | 159.9 | 86412.8  |

|     |        |     |      |       |       |        |          |       |       |          |
|-----|--------|-----|------|-------|-------|--------|----------|-------|-------|----------|
| 540 | Yld(%) | 91  | 49.6 | 41.4  | -30.8 | 3503.2 | 305182.3 | 571.8 | 159.9 | 86412.8  |
| 541 | Yld(%) | 33  | 24.2 | 8.8   | -28.9 | 837.1  | 272381.5 | 34.5  | 132.5 | 809156.1 |
| 542 | Yld(%) | 58  | 49.6 | 8.4   | -30.8 | 3503.2 | 305182.3 | 571.8 | 159.9 | 86412.8  |
| 543 | Yld(%) | 58  | 52.1 | 5.9   | -30.8 | 3503.2 | 427921.8 | 571.8 | 159.9 | 86412.8  |
| 544 | Yld(%) | 96  | 46.2 | 49.8  | -30.8 | 3503.2 | 129404.9 | 571.8 | 159.9 | 86412.8  |
| 545 | Yld(%) | 39  | 49.6 | -10.6 | -30.8 | 3503.2 | 305182.3 | 571.8 | 159.9 | 86412.8  |
| 546 | Yld(%) | 54  | 46.2 | 7.8   | -30.8 | 3503.2 | 129404.9 | 571.8 | 159.9 | 86412.8  |
| 547 | Yld(%) | 70  | 49.6 | 20.4  | -30.8 | 3503.2 | 305182.3 | 571.8 | 159.9 | 86412.8  |
| 548 | Yld(%) | 16  | 49.6 | -33.6 | -30.8 | 3503.2 | 305182.3 | 571.8 | 159.9 | 86412.8  |
| 549 | Yld(%) | 3   | 52.1 | -49.1 | -30.8 | 3503.2 | 427921.8 | 571.8 | 159.9 | 86412.8  |
| 550 | Yld(%) | 45  | 47.4 | -2.4  | -30.8 | 3503.2 | 129404.9 | 571.8 | 159.9 | 13276.1  |
| 551 | Yld(%) | 31  | 50.9 | -19.9 | -30.8 | 3503.2 | 305182.3 | 571.8 | 159.9 | 13276.1  |
| 552 | Yld(%) | 70  | 37.9 | 32.1  | -28.9 | 837.1  | 272381.5 | 171.9 | 132.5 | 269718.7 |
| 553 | Yld(%) | 52  | 47.4 | 4.6   | -30.8 | 3503.2 | 129404.9 | 571.8 | 159.9 | 13276.1  |
| 554 | Yld(%) | 63  | 50.9 | 12.1  | -30.8 | 3503.2 | 305182.3 | 571.8 | 159.9 | 13276.1  |
| 555 | Yld(%) | 3   | 50.9 | -47.9 | -30.8 | 3503.2 | 305182.3 | 571.8 | 159.9 | 13276.1  |
| 556 | Yld(%) | 9   | 66.6 | -57.6 | -38.4 | 4372.8 | 534144.0 | 713.7 | 199.6 | 16571.7  |
| 557 | Yld(%) | 51  | 47.4 | 3.6   | -30.8 | 3503.2 | 129404.9 | 571.8 | 159.9 | 13276.1  |
| 558 | Yld(%) | 16  | 50.9 | -34.9 | -30.8 | 3503.2 | 305182.3 | 571.8 | 159.9 | 13276.1  |
| 559 | Yld(%) | 33  | 47.4 | -14.4 | -30.8 | 3503.2 | 129404.9 | 571.8 | 159.9 | 13276.1  |
| 560 | Yld(%) | 47  | 50.9 | -3.9  | -30.8 | 3503.2 | 305182.3 | 571.8 | 159.9 | 13276.1  |
| 561 | Yld(%) | 0,4 | 50.9 | -50.5 | -30.8 | 3503.2 | 305182.3 | 571.8 | 159.9 | 13276.1  |
| 562 | Yld(%) | 4   | 53.3 | -49.3 | -30.8 | 3503.2 | 427921.8 | 571.8 | 159.9 | 13276.1  |
| 563 | Yld(%) | 72  | 37.9 | 34.1  | -28.9 | 837.1  | 272381.5 | 171.9 | 132.5 | 269718.7 |
| 564 | Yld(%) | 82  | 50.4 | 31.6  | -38.4 | 1113.6 | 362333.8 | 228.7 | 176.2 | 358791.6 |
| 565 | Yld(%) | 66  | 53.9 | 12.1  | -38.4 | 1113.6 | 362333.8 | 228.7 | 176.2 | 154486.0 |
| 566 | Yld(%) | 11  | 38.5 | -27.5 | -28.9 | 837.1  | 272381.5 | 171.9 | 132.5 | 232267.3 |
| 567 | Yld(%) | 10  | 35.6 | -25.6 | -28.9 | 837.1  | 272381.5 | 171.9 | 132.5 | 404578.0 |
| 568 | Yld(%) | 65  | 40.5 | 24.5  | -28.9 | 837.1  | 272381.5 | 289.0 | 132.5 | 337148.4 |
| 569 | Yld(%) | 76  | 30.5 | 45.5  | -28.9 | 837.1  | 272381.5 | 86.0  | 132.5 | 539437.4 |
| 570 | Yld(%) | 43  | 36.1 | 6.9   | -28.9 | 837.1  | 272381.5 | 257.9 | 132.5 | 539437.4 |
| 571 | Yld(%) | 46  | 37.9 | 8.1   | -28.9 | 837.1  | 272381.5 | 171.9 | 132.5 | 269718.7 |
| 572 | Yld(%) | 13  | 31.9 | -18.9 | -28.9 | 837.1  | 272381.5 | 34.5  | 132.5 | 360770.2 |
| 573 | Yld(%) | 19  | 30.8 | -11.8 | -28.9 | 837.1  | 272381.5 | 34.5  | 132.5 | 424678.1 |
| 574 | Yld(%) | 75  | 36.5 | 38.5  | -28.9 | 837.1  | 272381.5 | 171.9 | 132.5 | 348386.7 |
| 575 | Yld(%) | 5   | 42.1 | -37.1 | -28.9 | 837.1  | 272381.5 | 171.9 | 132.5 | 25769.3  |
| 576 | Yld(%) | 33  | 40.5 | -7.5  | -28.9 | 837.1  | 272381.5 | 171.9 | 132.5 | 116133.7 |
| 577 | Yld(%) | 54  | 36.5 | 17.5  | -28.9 | 837.1  | 272381.5 | 171.9 | 132.5 | 348386.7 |
| 578 | Yld(%) | 70  | 41.6 | 28.4  | -28.9 | 837.1  | 457376.5 | 171.9 | 132.5 | 269718.7 |
| 579 | Yld(%) | 18  | 37.9 | -19.9 | -29.9 | 867.2  | 282170.2 | 178.1 | 137.2 | 360906.8 |
| 580 | Yld(%) | 73  | 40.2 | 32.8  | -29.9 | 867.2  | 558007.7 | 178.1 | 137.2 | 543874.0 |
| 581 | Yld(%) | 59  | 37.9 | 21.1  | -29.9 | 867.2  | 558007.7 | 35.7  | 137.2 | 407905.5 |
| 582 | Yld(%) | 44  | 40.1 | 3.9   | -29.9 | 867.2  | 558007.7 | 35.7  | 137.2 | 279411.7 |
| 583 | Yld(%) | 69  | 38.5 | 30.5  | -29.9 | 867.2  | 558007.7 | 35.7  | 137.2 | 373735.4 |
| 584 | Yld(%) | 43  | 38.5 | 4.5   | -29.9 | 867.2  | 558007.7 | 35.7  | 137.2 | 373735.4 |
| 585 | Yld(%) | 24  | 46.3 | -22.3 | -29.9 | 867.2  | 558007.7 | 178.1 | 137.2 | 186867.7 |
| 586 | Yld(%) | 18  | 37.4 | -19.4 | -29.9 | 867.2  | 558007.7 | 35.7  | 137.2 | 439939.9 |

|     |        |    |      |       |       |        |          |        |       |           |
|-----|--------|----|------|-------|-------|--------|----------|--------|-------|-----------|
| 587 | Yld(%) | 8  | 38.1 | -30.1 | -29.9 | 867.2  | 398576.9 | 53.6   | 137.2 | 245597.5  |
| 588 | Yld(%) | 75 | 48.3 | 26.7  | -29.9 | 867.2  | 398576.9 | 449.0  | 137.2 | 401498.6  |
| 589 | Yld(%) | 34 | 48.6 | -14.6 | -29.9 | 867.2  | 398576.9 | 299.4  | 137.2 | 101976.4  |
| 590 | Yld(%) | 8  | 45.5 | -37.5 | -29.9 | 867.2  | 398576.9 | 299.4  | 137.2 | 279411.7  |
| 591 | Yld(%) | 9  | 27.1 | -18.1 | -29.9 | 867.2  | 365222.5 | 35.7   | 137.2 | 815811.0  |
| 592 | Yld(%) | 4  | 27.3 | -23.3 | -38.4 | 1113.6 | 90583.4  | 45.9   | 176.2 | 1047579.9 |
| 593 | Yld(%) | 66 | 43.9 | 22.1  | -29.5 | 1167.5 | 272381.5 | 171.9  | 188.5 | 539437.4  |
| 594 | Yld(%) | 51 | 62.6 | -11.6 | -42.1 | 1663.6 | 388130.4 | 245.0  | 268.7 | 768672.0  |
| 595 | Yld(%) | 54 | 41.2 | 12.8  | -29.5 | 1167.5 | 136190.8 | 171.9  | 188.5 | 539437.4  |
| 596 | Yld(%) | 58 | 32.8 | 25.2  | -28.5 | 837.1  | 272381.5 | 171.9  | 125.3 | 539437.4  |
| 597 | Yld(%) | 38 | 34.4 | 3.6   | -31.2 | 176.4  | 272381.5 | 171.9  | 133.6 | 539437.4  |
| 598 | Yld(%) | 60 | 34.8 | 25.2  | -29.9 | 506.8  | 272381.5 | 171.9  | 133.0 | 539437.4  |
| 599 | Yld(%) | 60 | 49.4 | 10.6  | -31.3 | 506.8  | 272381.5 | 171.9  | 189.7 | 539437.4  |
| 600 | Yld(%) | 55 | 33.3 | 21.7  | -28.9 | 837.1  | 272381.5 | 171.9  | 132.5 | 539437.4  |
| 601 | Yld(%) | 51 | 33.3 | 17.7  | -28.9 | 837.1  | 272381.5 | 171.9  | 132.5 | 539437.4  |
| 602 | Yld(%) | 13 | 30.7 | -17.7 | -28.0 | 1167.5 | 272381.5 | 171.9  | 131.9 | 539437.4  |
| 603 | Yld(%) | 66 | 47.0 | 19.0  | -30.4 | 837.1  | 272381.5 | 171.9  | 189.1 | 539437.4  |
| 604 | Yld(%) | 46 | 64.4 | -18.4 | -31.3 | 837.1  | 272381.5 | 171.9  | 245.8 | 539437.4  |
| 605 | Yld(%) | 54 | 25.0 | 29.0  | -27.5 | 2477.1 | 272381.5 | 171.9  | 190.5 | 539437.4  |
| 606 | Yld(%) | 68 | 43.9 | 24.1  | -29.5 | 1167.5 | 272381.5 | 171.9  | 188.5 | 539437.4  |
| 607 | Yld(%) | 10 | 23.0 | -13.0 | -26.8 | 1816.4 | 272381.5 | 171.9  | 135.0 | 539437.4  |
| 608 | Yld(%) | 49 | 49.0 | 0.0   | -29.6 | 176.4  | 272381.5 | 171.9  | 141.0 | 539437.4  |
| 609 | Yld(%) | 0  | 25.2 | -25.2 | -29.3 | 637.8  | 272381.5 | 171.9  | 107.8 | 539437.4  |
| 610 | Yld(%) | 11 | 37.2 | -26.2 | -30.5 | 637.8  | 272381.5 | 171.9  | 155.6 | 539437.4  |
| 611 | Yld(%) | 45 | 41.4 | 3.6   | -28.9 | 176.4  | 272381.5 | 171.9  | 110.8 | 539437.4  |
| 612 | Yld(%) | 0  | 38.1 | -38.1 | -29.2 | 837.1  | 272381.5 | 171.9  | 148.4 | 539437.4  |
| 613 | Yld(%) | 0  | 3.7  | -3.7  | -28.0 | 1167.5 | 272381.5 | 171.9  | 68.7  | 539437.4  |
| 614 | Yld(%) | 0  | 20.8 | -20.8 | -28.1 | 1564.1 | 272381.5 | 171.9  | 135.0 | 539437.4  |
| 615 | Yld(%) | 5  | 20.5 | -15.5 | -28.9 | 837.1  | 68095.4  | 34.5   | 132.5 | 787509.9  |
| 616 | Yld(%) | 82 | 63.3 | 18.7  | -47.4 | 6504.2 | 48018.0  | 1357.9 | 299.2 | 34980.0   |
| 618 | Yld(%) | 78 | 49.4 | 28.6  | -31.4 | 3503.2 | 64702.5  | 571.8  | 181.2 | 94268.5   |
| 619 | Yld(%) | 17 | 24.5 | -7.5  | -28.9 | 837.1  | 272381.5 | 34.5   | 132.5 | 787509.9  |
| 620 | Yld(%) | 7  | 51.7 | -44.7 | -33.9 | 3503.2 | 64702.5  | 571.8  | 230.3 | 141402.7  |
| 621 | Yld(%) | 71 | 49.4 | 21.6  | -31.4 | 3503.2 | 64702.5  | 571.8  | 183.0 | 141402.7  |
| 622 | Yld(%) | 68 | 54.4 | 13.6  | -31.9 | 3503.2 | 64702.5  | 571.8  | 204.3 | 141402.7  |
| 623 | Yld(%) | 63 | 44.7 | 18.3  | -30.8 | 3503.2 | 64702.5  | 571.8  | 159.9 | 94268.5   |
| 624 | Yld(%) | 60 | 37.6 | 22.4  | -30.8 | 3503.2 | 64702.5  | 571.8  | 159.9 | 510078.2  |
| 625 | Yld(%) | 54 | 37.6 | 16.4  | -30.8 | 3503.2 | 64702.5  | 571.8  | 159.9 | 510078.2  |
| 626 | Yld(%) | 74 | 26.6 | 47.4  | -30.8 | 3503.2 | 64702.5  | 38.6   | 159.9 | 141402.7  |
| 627 | Yld(%) | 61 | 64.8 | -3.8  | -41.8 | 4672.3 | 86296.5  | 762.6  | 241.6 | 188595.0  |
| 628 | Yld(%) | 66 | 67.8 | -1.8  | -45.2 | 4672.3 | 86296.5  | 762.6  | 307.1 | 251460.0  |
| 629 | Yld(%) | 7  | 29.0 | -22.0 | -28.9 | 837.1  | 272381.5 | 171.9  | 132.5 | 787509.9  |
| 630 | Yld(%) | 0  | 33.6 | -33.6 | -33.9 | 3503.2 | 64702.5  | 38.6   | 230.3 | 188537.0  |
| 631 | Yld(%) | 88 | 68.3 | 19.7  | -45.7 | 5199.7 | 192072.0 | 848.7  | 237.3 | 139920.0  |
| 632 | Yld(%) | 0  | 59.6 | -59.6 | -38.4 | 4372.8 | 271232.0 | 713.7  | 199.6 | 117668.6  |
| 633 | Yld(%) | 93 | 59.6 | 33.4  | -38.4 | 4372.8 | 271232.0 | 713.7  | 199.6 | 117668.6  |
| 634 | Yld(%) | 84 | 59.6 | 24.4  | -38.4 | 4372.8 | 271232.0 | 713.7  | 199.6 | 117668.6  |



|     |        |    |      |       |       |        |          |        |       |           |
|-----|--------|----|------|-------|-------|--------|----------|--------|-------|-----------|
| 635 | Yld(%) | 73 | 63.6 | 9.4   | -38.4 | 4372.8 | 474121.1 | 713.7  | 199.6 | 117668.6  |
| 636 | Yld(%) | 42 | 46.0 | -4.0  | -30.8 | 3503.2 | 129404.9 | 571.8  | 159.9 | 94268.5   |
| 637 | Yld(%) | 90 | 89.3 | 0.7   | -57.5 | 6548.6 | 406196.0 | 1068.9 | 298.9 | 176220.0  |
| 638 | Yld(%) | 77 | 59.6 | 17.4  | -38.4 | 4372.8 | 271232.0 | 713.7  | 199.6 | 117668.6  |
| 639 | Yld(%) | 88 | 89.5 | -1.5  | -57.5 | 6548.6 | 406196.0 | 1068.9 | 298.9 | 161535.0  |
| 640 | Yld(%) | 3  | 19.5 | -16.5 | -28.9 | 837.1  | 272381.5 | 34.5   | 132.5 | 1082826.1 |

### 3. Molecule codes

- SUBSTRATES**

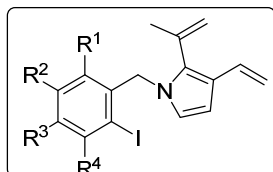

|            |                                                            |            |                                                                                   |
|------------|------------------------------------------------------------|------------|-----------------------------------------------------------------------------------|
| <b>S01</b> | $R^1 = R^4 = \text{H}, R^2 = R^3 = \text{CH}_3\text{O}$    | <b>S08</b> | $R^1 = \text{H}, R^2 = R^3 = R^4 = \text{CH}_3\text{O}$                           |
| <b>S02</b> | $R^1 = R^4 = \text{H}, R^2 = R^3 = -\text{OCH}_2\text{O}-$ | <b>S09</b> | $R^1 = R^4 = \text{H}, R^2 = \text{BnO}, R^3 = \text{CH}_3\text{O}$               |
| <b>S03</b> | $R^1 = R^2 = R^3 = R^4 = \text{H}$                         | <b>S10</b> | $R^1 = R^4 = \text{H}, R^2 = R^3 = \text{BnO}$                                    |
| <b>S04</b> | $R^1 = R^3 = R^4 = \text{H}, R^2 = \text{CH}_3\text{O}$    | <b>S11</b> | $R^1 = R^4 = \text{H}, R^2 = 3\text{-NO}_2\text{BnO}, R^3 = \text{CH}_3\text{O}$  |
| <b>S05</b> | $R^1 = R^3 = R^4 = \text{H}, R^2 = \text{BnO}$             | <b>S12</b> | $R^1 = R^4 = \text{H}, R^2 = 3\text{-CH}_3\text{OBnO}, R^3 = \text{CH}_3\text{O}$ |
| <b>S06</b> | $R^1 = R^3 = \text{H}, R^2 = R^4 = \text{CH}_3\text{O}$    | <b>S13</b> | $R^1 = R^3 = R^4 = \text{H}, R^2 = \text{NO}_2$                                   |
| <b>S07</b> | $R^1 = R^2 = \text{CH}_3\text{O}, R^3 = R^4 = \text{H}$    | <b>S14</b> | $R^1 = R^3 = R^4 = \text{H}, R^2 = \text{F}$                                      |

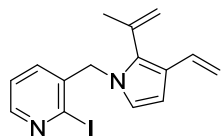

S15

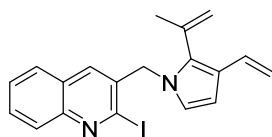

S16

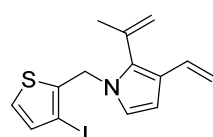

S17

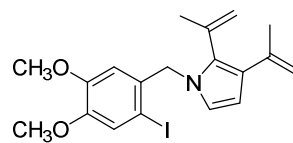

S18

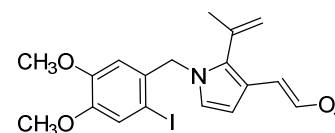

S19

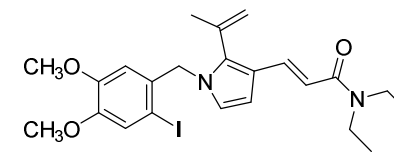

S20

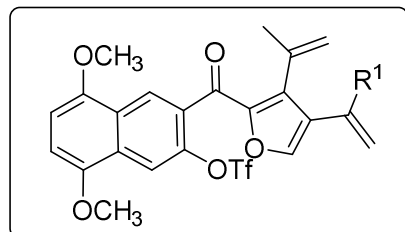

|            |                     |
|------------|---------------------|
| <b>S21</b> | $R^1 = \text{H}$    |
| <b>S22</b> | $R^1 = \text{CH}_3$ |

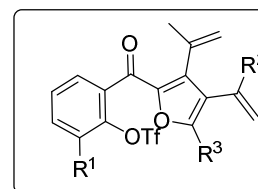

|            |                                           |
|------------|-------------------------------------------|
| <b>S23</b> | $R^1 = R^3 = \text{H}, R^2 = \text{CH}_3$ |
| <b>S24</b> | $R^1 = R^2 = R^3 = \text{H}$              |
| <b>S25</b> | $R^1 = R^3 = \text{H}, R^2 = \text{Ph}$   |
| <b>S26</b> | $R^1 = \text{CH}_3, R^2 = R^3 = \text{H}$ |
| <b>S27</b> | $R^1 = R^2 = \text{CH}_3, R^3 = \text{H}$ |

• PRODUCTS

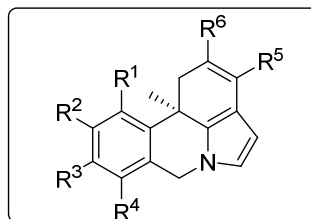

|            |                                                |            |                                                            |            |                                                         |
|------------|------------------------------------------------|------------|------------------------------------------------------------|------------|---------------------------------------------------------|
| <b>P01</b> | $R^1 = R^4 = R^5 = R^6 = H, R^2 = R^3 = CH_3O$ | <b>P07</b> | $R^1 = R^2 = R^5 = R^6 = H, R^3 = R^4 = CH_3O$             | <b>P13</b> | $R^1 = R^2 = R^4 = R^5 = H, R^3 = NO_2$                 |
| <b>P02</b> | $R^1 = R^4 = H, R^2 = R^3 = -OCH_2O-$          | <b>P08</b> | $R^1 = R^2 = R^3 = CH_3O, R^4 = R^5 = R^6 = H$             | <b>P14</b> | $R^1 = R^2 = R^4 = R^5 = H, R^3 = F$                    |
| <b>P03</b> | $R^1 = R^2 = R^3 = R^4 = R^5 = R^6 = H$        | <b>P09</b> | $R^1 = R^4 = R^5 = R^6 = H, R^2 = CH_3O, R^3 = BnO$        | <b>P18</b> | $R^1 = R^4 = R^6 = H, R^2 = R^3 = CH_3O, R^5 = CH_3$    |
| <b>P04</b> | $R^1 = R^2 = R^4 = R^5 = R^6 = H, R^3 = CH_3O$ | <b>P10</b> | $R^1 = R^4 = R^5 = R^6 = H, R^2 = R^3 = BnO$               | <b>P19</b> | $R^1 = R^4 = R^5 = H, R^2 = R^3 = R^6 = CH_3O$          |
| <b>P05</b> | $R^1 = R^2 = R^4 = R^5 = R^6 = H, R^3 = BnO$   | <b>P11</b> | $R^1 = R^4 = R^5 = R^6 = H, R^2 = CH_3O, R^3 = 3-NO_2BnO$  | <b>P20</b> | $R^1 = R^4 = R^5 = H, R^2 = R^3 = CH_3O, R^6 = CONEt_2$ |
| <b>P06</b> | $R^2 = R^4 = R^5 = R^6 = H, R^1 = R^3 = CH_3O$ | <b>P12</b> | $R^1 = R^4 = R^5 = R^6 = H, R^2 = CH_3O, R^3 = 3-CH_3OBnO$ |            |                                                         |

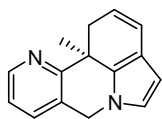

**P15**

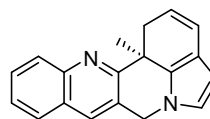

**P16**

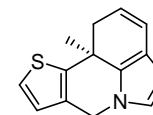

**P17**

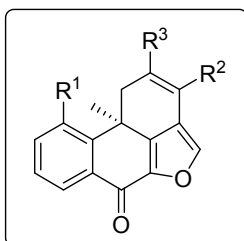

|            |                             |
|------------|-----------------------------|
| <b>P24</b> | $R^1 = R^3 = H, R^2 = CH_3$ |
| <b>P25</b> | $R^1 = R^2 = R^3 = H$       |
| <b>P26</b> | $R^1 = R^3 = H, R^2 = Ph$   |
| <b>P27</b> | $R^1 = CH_3, R^2 = R^3 = H$ |
| <b>P28</b> | $R^1 = R^2 = CH_3, R^3 = H$ |

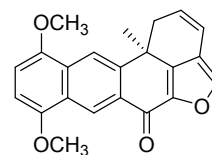

**P21**

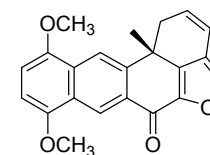

**P22**

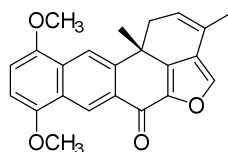

**P23**

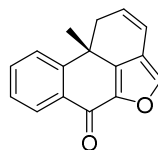

**P29**

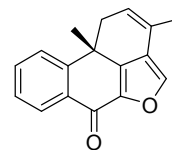

**P30**

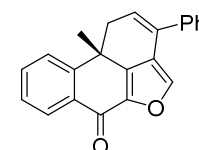

**P31**

• **LIGANDS**

(R) LXA  
(S) LXB

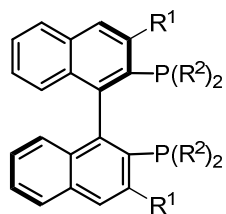

- L01A**  $R^1 = H, R^2 = Ph$   
**L03A**  $R^1 = H, R^2 = 3,5-(CH_3)_2Ph$   
**L08A**  $R^1 = OCH_3, R^2 = Ph$   
**L09A**  $R^1 = OiPr, R^2 = Ph$   
**L10A**  $R^1 = OBn, R^2 = Ph$   
**L11A**  $R^1 = OPiv, R^2 = Ph$   
**L13A**  $R^1 = OiPr, R^2 = 3,5-(CH_3)_2Ph$   
**L14A**  $R^1 = H, R^2 = 3-CH_3Ph$

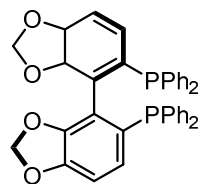

**L02A**

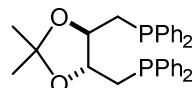

**L04A**

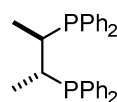

**L05A**

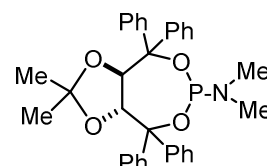

**L06A**

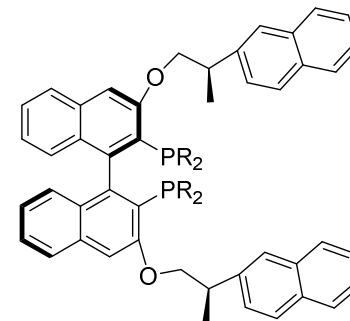

**L12A**  $R = 3,5-(CH_3)_2Ph$

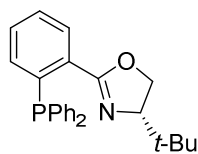

**L07A**

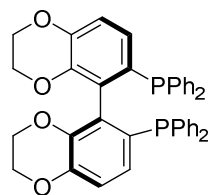

**L15A**

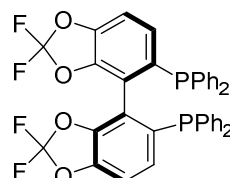

**L16A**

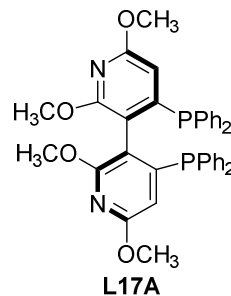

**L17A**

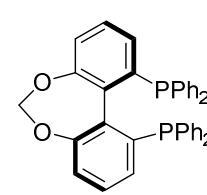

**L18A**

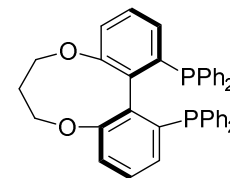

**L19A**

#### 4. Experimental procedure for the synthesis of (*R*)-9,10-dimethoxy-11b-methyl-7,11b-dihydro-1H-pyrrolo[3,2,1-*de*]phenanthridine.<sup>1</sup>

##### 4.1 Reaction of 1-(2-iodo-4,5-dimethoxybenzyl)-2-(prop-1-en-2-yl)-3-vinyl-1H-pyrrole with Pd(*dba*)<sub>2</sub>/PMP in EtOH.

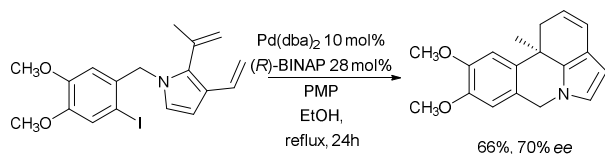

To a solution of 1-(2-iodo-4,5-dimethoxybenzyl)-2-(prop-1-en-2-yl)-3-vinyl-1H-pyrrole (53 mg, 0.13 mmol) in anhydrous EtOH (2 mL) under an argon atmosphere, (*R*)-BINAP (23 mg, 0.04 mmol), PMP (0.05 mL, 0.26 mmol) and Pd(*dba*)<sub>2</sub> (7.5 mg, 0.013 mmol) were added. The mixture was heated under reflux for 24 h. Then the reaction mixture was diluted with AcOEt (50 mL), washed with saturated NH<sub>4</sub>Cl (1×30 mL) and H<sub>2</sub>O (2×30 mL). The combined organic extracts were dried (Na<sub>2</sub>SO<sub>4</sub>), and concentrated under vacuum. Flash column chromatography (silica gel, hexane/AcOEt) afforded the pyrrolophenanthridine as an oil; yield: 24 mg (66%). IR (ATR):  $\nu=1511$  cm<sup>-1</sup> (C=C); <sup>1</sup>H NMR (300 MHz, CDCl<sub>3</sub>):  $\delta$  = 1.28 (s, 3H, CH<sub>3</sub>), 2.56–2.82 (m, 2H, 2×H-1), 3.89 (s, 3H, OCH<sub>3</sub>), 3.92 (s, 3H, OCH<sub>3</sub>), 5.01 (d, *J*=15.4 Hz, 1H, H-7a), 5.04 (d, *J*=15.4 Hz, 1H, H-7b), 5.52–5.70 (m, 1H, H-2), 6.10 (d, *J*=2.6 Hz, 1H, H-4), 6.49 (dd, *J*=9.4, 3.1 Hz, 1H, H-3), 6.61 (d, *J*=2.6 Hz, 1H, H-5), 6.72 (s, 1H, H-11), 6.86 (s, 1H, H-8); <sup>13</sup>C NMR (75.5 MHz, CDCl<sub>3</sub>):  $\delta$  = 27.4 (CH<sub>3</sub>), 34.1 (C-11b), 37.1 (C-1), 47.0 (C-7), 56.4 (2×OCH<sub>3</sub>), 105.7 (C-4), 107.8 (C-11), 109.9 (C-8), 113.4 (C-3a), 117.0 (C-5), 117.8 (C-2), 122.9 (C-11a), 123.1 (C-3), 132.0 (C-3a1), 135.6 (C-7a), 147.3 (C-9), 148.8 (C-10); MS (CI): *m/z* (rel. intensity)=282 (MH<sup>+</sup>, 100), 281 (M<sup>+</sup>, 67), 267 (22), 266 (78); HR-MS (CI): *m/z*=282.1489, calcd. for C<sub>18</sub>H<sub>20</sub>NO<sub>2</sub> [MH]<sup>+</sup>: 282.1494. [ $\alpha$ ]<sub>D</sub><sup>20</sup>: +22.7 (c=0.32, CH<sub>2</sub>Cl<sub>2</sub>). The enantiomeric excess was determined by HPLC to be 70%, [Chiralcel OZ3, hexane/isopropyl alcohol 98:2, 0.8 mL.min<sup>-1</sup>, *t*<sub>r</sub> (minor)=15.8 min (14.86%), *t*<sub>r</sub> (major)= 16.7 min (85.14%)].

##### 4.1 Reaction of 1-(2-iodo-4,5-dimethoxybenzyl)-2-(prop-1-en-2-yl)-3-vinyl-1H-pyrrole with Pd(OAc)<sub>2</sub>/PMP in EtOH.

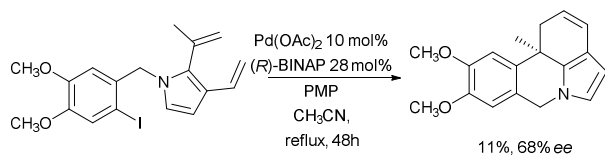

<sup>1</sup> E. Coya, N. Sotomayor, E. Lete, *Adv. Synt. Catal.* 2015, **357**, 3206-3214 (Highlighted in: *SYNFACTS*, 2016, **12**, 0067-0067).

To a solution of 1-(2-iodo-4,5-dimethoxybenzyl)-2-(prop-1-en-2-yl)-3-vinyl-1H-pyrrole (47 mg, 0.11 mmol) in anhydrous EtOH (2 mL) under an argon atmosphere, (*R*)-BINAP (20 mg, 0.01 mmol), PMP (0.04 mL, 0.23 mmol) and Pd(OAc)<sub>2</sub> (2.6 mg, 0.011 mmol) were added. The mixture was heated under reflux for 48 h. Then the reaction mixture was diluted with AcOEt (50 mL), washed with saturated NH<sub>4</sub>Cl (1×30 mL) and H<sub>2</sub>O (2×30 mL). The combined organic extracts were dried (Na<sub>2</sub>SO<sub>4</sub>), and concentrated under vacuum. Flash column chromatography (silica gel, hexane/AcOEt) afforded the pyrrolophenanthridine as an oil; yield: 9.9 mg (11%). The enantiomeric excess was determined by HPLC to be 68%, [Chiralcel OZ3, hexane/isopropyl alcohol 98:2, 1 mL.min<sup>-1</sup>, tr (minor)= 12.3 min (16.21%), tr (major)= 12.9 min (83.79%)].

### 5. Copies of HPLC chromatograms

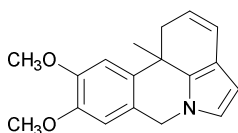

Racemic mixture

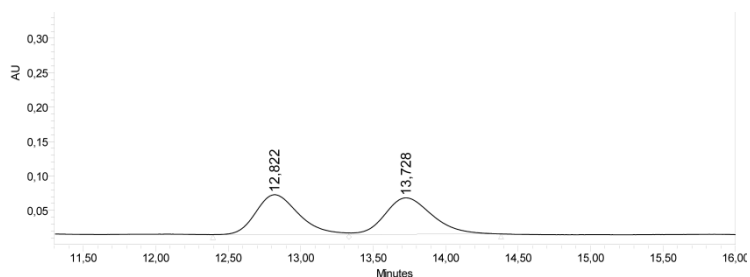

|   | RT     | Area    | % Area | Height |
|---|--------|---------|--------|--------|
| 1 | 12,822 | 1182037 | 49,81  | 57840  |
| 2 | 13,728 | 1190822 | 50,19  | 52806  |

Chiralcel OZ3, hexane/isopropyl alcohol 98:2, 1 mL.min<sup>-1</sup>

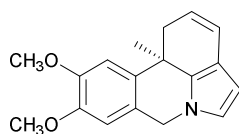

Scheme 4. (*R*)-9,10-dimethoxy-11b-methyl-7,11b-dihydro-1H-pyrrolo[3,2,1-*de*]phenanthridine

(Pd(*dba*)<sub>2</sub>/PMP in EtOH)

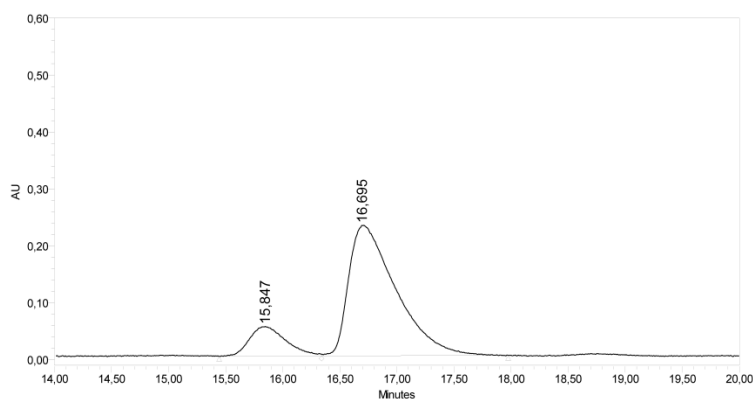

|   | RT     | Area    | % Area | Height |
|---|--------|---------|--------|--------|
| 1 | 15,847 | 1153186 | 14,86  | 52035  |
| 2 | 16,695 | 6605511 | 85,14  | 229342 |

Chiralcel OZ3, hexane/isopropyl alcohol 98:2, 0.8 mL.min<sup>-1</sup>

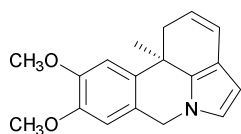

(*R*)-9,10-dimethoxy-11b-methyl-7,11b-dihydro-1H-pyrrolo[3,2,1-*de*]phenanthridine  
(Pd(OAc)<sub>2</sub>/PMP in EtOH)

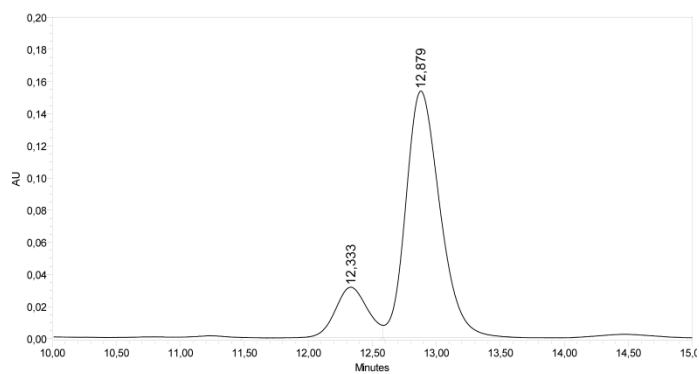

|   | RT     | Area    | % Area | Height |
|---|--------|---------|--------|--------|
| 1 | 12,333 | 550012  | 16,21  | 31353  |
| 2 | 12,879 | 2843771 | 83,79  | 153423 |

Chiralcel OZ3, hexane/isopropyl alcohol 98:2, 1 mL.min<sup>-1</sup>
